# Supplementary material for: The hsa-miR-1246 is overexpressed in Spheroids-derived cancer stem cells from tumor cell lines
Source: Research Square preprint supplement (doi:10.21203/rs.3.rs-6222076/v1), 2025-04-03
Supplement: Supplementary file 1 [file fe4f0b7a9ae3b8d25d36bdea.xlsx]

## Sheet: Table 1 Small RNA dataset from 
Supplementary table 1: Results from bioinformatic analysis on Galaxy.org of small RNA-seq in spheroid-derived cancer stem cells compared to adherent cells in the lung cancer NCI-H1975 cell line (P value < 0,05)
Down regulated miRNAs CSCs vs adherent cells				Up regulated miRNAs CSCs vs adherent cells
miRNAs	log2FoldChange	pvalue		miRNAs	log2FoldChange	pvalue
hsa-miR-1247-5p	-8.05727	2.72e-06		hsa-miR-423-3p	0.681052	0.0151
hsa-miR-489-3p	-7.25816	6.77e-05		hsa-miR-328-3p	0.68263	0.00657
hsa-miR-129-1-3p	-6.4877	0.000692501		hsa-miR-450b-5p	0.700057	0.0416364
hsa-miR-212-3p	-6.19201	0.00183027		hsa-miR-92b-3p	0.707538	0.00655
hsa-miR-548q	-6.01647	0.00318823		hsa-miR-193a-5p	0.793129	0.00327998
hsa-miR-1247-3p	-5.73756	0.00656684		hsa-miR-423-5p	0.797437	0.00292856
hsa-miR-203b-3p	-5.61713	0.0175		hsa-miR-193b-5p	0.842114	0.0115837
hsa-miR-514a-3p	-5.61112	0.00874		hsa-miR-197-3p	0.893865	0.000176
hsa-miR-514a-3p,1	-5.61112	0.00873641		hsa-miR-3615	0.907049	0.00696272
hsa-miR-514a-3p,2	-5.61112	0.00874		hsa-miR-4326	0.945484	0.00281
hsa-miR-141-5p	-5.39095	0.0214814		hsa-miR-615-3p	0.960345	0.000592
hsa-miR-205-5p	-5.29658	1.15e-28		hsa-miR-148a-3p	0.979285	0.0305198
hsa-miR-506-3p	-5.22228	0.0254746		hsa-let-7a-3p	1.01052	0.00762687
hsa-miR-509-3p	-5.16158	0.0328116		hsa-let-7a-3p,1	1.01052	0.00762687
hsa-miR-509-3p,1	-5.16158	0.0328116		hsa-miR-21-5p	1.02278	0.00015241
hsa-miR-509-3p,2	-5.16158	0.0328116		hsa-miR-1307-3p	1.07963	0.000152
hsa-miR-577	-5.1133	0.0305198		hsa-miR-151a-3p	1.09485	0.0467038
hsa-miR-4454	-4.65135	5.69e-09		hsa-miR-1292-5p	1.11279	0.00319689
hsa-miR-200b-5p	-4.54678	3.18e-08		hsa-miR-516a-5p	1.16951	0.00874
hsa-miR-200c-3p	-3.96012	2.33e-37		hsa-miR-516a-5p,1	1.16951	0.00874
hsa-miR-4697-3p	-3.83512	0.00327998		hsa-miR-744-5p	1.18801	1.16e-06
hsa-miR-504-5p	-3.81333	4.24e-17		hsa-miR-4787-3p	1.21471	0.0151
hsa-miR-4443	-3.66213	1.75e-10		hsa-miR-2110	1.26119	1.97e-05
hsa-miR-203a-3p	-3.64346	4.61e-16		hsa-miR-146a-5p	1.29329	1.57e-07
hsa-miR-500b-3p	-3.59707	0.00386358		hsa-miR-548o-3p	1.30159	0.0294962
hsa-miR-224-5p	-3.39787	5.38e-08		hsa-miR-548o-3p,1	1.30159	0.0294962
hsa-miR-452-5p	-3.23489	0.000362536		hsa-miR-32-5p	1.31121	0.0133
hsa-miR-3173-5p	-3.10559	0.00328		hsa-miR-455-5p	1.31755	0.000133699
hsa-miR-194-3p	-2.95167	1.96e-07		hsa-miR-486-5p,1	1.34991	7.05e-07
hsa-miR-371a-5p	-2.92307	0.0155		hsa-miR-2277-5p	1.36309	7.61e-05
hsa-miR-642a-5p	-2.912	0.000176962		hsa-miR-486-5p	1.36983	4.71e-07
hsa-miR-200b-3p	-2.89631	1.53e-34		hsa-miR-15b-3p	1.40695	0.0152
hsa-miR-200a-5p	-2.89049	6.12e-05		hsa-miR-101-3p	1.4283	6.97e-06
hsa-miR-130a-3p	-2.82217	0.00015241		hsa-miR-101-3p,1	1.44296	5.24e-06
hsa-miR-200a-3p	-2.71994	8.92e-05		hsa-miR-6511b-3p	1.45432	0.00506132
hsa-miR-1266-5p	-2.71098	0.0382586		hsa-miR-1343-3p	1.45638	0.000157801
hsa-miR-372-3p	-2.69042	0.0309424		hsa-miR-125a-3p	1.51392	0.000247389
hsa-miR-335-3p	-2.63217	7.45e-08		hsa-miR-92b-5p	1.53786	3.04e-06
hsa-miR-642b-5p	-2.6256	0.00051966		hsa-miR-7-5p,1	1.56258	0.00109317
hsa-miR-3661	-2.55627	0.0404096		hsa-miR-7-5p,2	1.56341	0.00109317
hsa-miR-29b-1-5p	-2.30996	0.0215307		hsa-miR-7-5p	1.5658	0.00113732
hsa-miR-1291	-2.27965	8.92e-05		hsa-miR-574-3p	1.63796	1.39e-07
hsa-miR-424-3p	-2.2277	4.84e-21		hsa-let-7b-3p	1.64136	0.000481379
hsa-miR-362-5p	-2.19654	5.58e-06		hsa-miR-3187-3p	1.66107	0.0204319
hsa-miR-3614-5p	-2.18692	0.0228216		hsa-miR-4521	1.67338	0.010648
hsa-miR-31-5p	-2.17751	2.48e-10		hsa-miR-877-5p	1.68534	1.4e-06
hsa-miR-1293	-2.1414	3.18e-08		hsa-miR-147b-3p	1.7409	5.56e-05
hsa-miR-339-5p	-2.1304	1.4e-06		hsa-miR-210-5p	1.74401	1.37e-06
hsa-miR-5100	-2.11165	8.74e-10		hsa-miR-1843	1.74582	0.00328
hsa-miR-4286	-2.08885	2.96e-09		hsa-miR-486-3p	1.75748	0.0213786
hsa-miR-378i	-2.06176	3.67e-06		hsa-miR-340-3p	1.80057	0.00977473
hsa-miR-1270	-2.04384	0.00632709		hsa-miR-1303	1.88244	5.68e-10
hsa-miR-339-3p	-1.98536	3.84e-18		hsa-miR-522-3p	1.89083	0
hsa-miR-138-5p	-1.95078	0.0201565		hsa-miR-365b-5p	1.89685	1.66e-06
hsa-miR-653-5p	-1.92428	0.000481379		hsa-miR-342-5p	1.90565	0.0397121
hsa-miR-141-3p	-1.91783	0.00131		hsa-miR-1910-5p	1.95651	0.00772872
hsa-miR-1271-5p	-1.87727	0.0111128		hsa-miR-7974	1.97349	0.00696282
hsa-miR-3940-3p	-1.82751	0.00328		hsa-miR-199b-5p	1.98162	0.00213839
hsa-miR-502-3p	-1.81983	1.65e-14		hsa-miR-4508	2.02549	0.0273741
hsa-miR-642a-3p	-1.75341	0.00319689		hsa-miR-6511b-3p,1	2.02696	0.00327998
hsa-miR-130b-3p	-1.72893	0.00223778		hsa-miR-1248	2.06061	0.00140722
hsa-miR-132-5p	-1.64727	0.0140878		hsa-miR-6842-3p	2.09034	0.0201565
hsa-miR-34c-5p	-1.63983	0.0111086		hsa-miR-6510-3p	2.17725	0.00158948
hsa-miR-375-3p	-1.61385	0.0111128		hsa-miR-210-3p	2.25234	8.49e-08
hsa-miR-29a-3p	-1.60027	7.61e-05		hsa-miR-197-5p	2.32047	0.00520034
hsa-miR-181c-3p	-1.59647	0.0346048		hsa-miR-760	2.32992	2.4e-08
hsa-miR-20a-5p	-1.57027	0.00233549		hsa-miR-1268a	2.40012	2.91e-07
hsa-miR-625-3p	-1.55579	7.79e-12		hsa-miR-1268b	2.42691	2.49e-07
hsa-miR-378c	-1.51052	0.00241934		hsa-miR-6860	2.42962	0.000580858
hsa-miR-181a-3p	-1.4781	0.000158		hsa-miR-935	2.43014	2.68e-18
hsa-miR-10b-5p	-1.42313	0.00340365		hsa-miR-193a-3p	2.45866	0.0305198
hsa-miR-125b-5p	-1.40195	0.000122		hsa-miR-499a-5p	2.56108	0.0346048
hsa-miR-181d-5p	-1.36781	2.63e-05		hsa-miR-199a-3p	2.59932	0.000575537
hsa-miR-425-3p	-1.35371	2.38e-05		hsa-miR-199b-3p	2.59932	0.000575537
hsa-miR-5010-3p	-1.32918	0.00351		hsa-miR-199a-3p,1	2.60265	0.00054973
hsa-miR-7977	-1.32564	0.000176837		hsa-miR-4449	2.72913	0.000616
hsa-miR-345-5p	-1.31716	0.000581		hsa-miR-7704	2.86373	2.4e-08
hsa-miR-125b-5p,1	-1.30797	0.000344729		hsa-miR-6726-3p	2.89359	0.030278
hsa-miR-1260b	-1.30121	0.00404		hsa-miR-4488	2.90281	0.00327998
hsa-miR-92a-1-5p	-1.29713	0.00015241		hsa-miR-671-5p	3.03849	9.4e-16
hsa-miR-500a-3p	-1.28799	6.96e-07		hsa-miR-188-5p	3.13062	0.0213786
hsa-miR-1260a	-1.2852	0.0044		hsa-miR-1908-5p	3.45711	7.96e-25
hsa-miR-149-5p	-1.23152	1.73e-05		hsa-miR-574-5p	3.58077	3.14e-32
hsa-miR-93-5p	-1.21146	0.0032		hsa-miR-4709-5p	3.63009	6.77e-05
hsa-miR-27a-5p	-1.19724	3.32e-06		hsa-miR-122-5p	3.70275	6e-14
hsa-miR-16-5p	-1.1607	0.0328116		hsa-miR-1246	3.80596	4.7e-40
hsa-miR-125b-1-3p	-1.15366	0.000514201		hsa-miR-6763-5p	3.83647	0.00114
hsa-miR-378a-5p	-1.15014	0.0111		hsa-miR-6721-5p	4.05021	0.00147673
hsa-miR-361-3p	-1.14212	2.66e-05		hsa-miR-1290	4.29147	1.02e-23
hsa-miR-221-3p	-1.13085	1.44e-05		hsa-miR-1908-3p	4.53759	1.72e-06
hsa-miR-107	-1.123	0.0433342		hsa-miR-10400-5p	4.56844	0.00838085
hsa-miR-378a-3p	-1.12131	0.000609072		hsa-miR-4516	4.60773	0.0183977
hsa-miR-550a-5p	-1.11482	0.0215307		hsa-miR-4492	4.80348	0.00102
hsa-miR-550a-5p,1	-1.11482	0.0215307		hsa-miR-1973	4.95267	0.00128
hsa-miR-16-5p,1	-1.11285	0.0440773		hsa-miR-3648	5.21548	0.0346048
hsa-miR-550a-3-5p	-1.11221	0.0215307		hsa-miR-3648,1	5.21548	0.0346048
hsa-miR-550a-3-5p,1	-1.11221	0.0215307		hsa-miR-9901	5.99244	0.000294
hsa-miR-361-5p	-1.07763	0.00977473		hsa-miR-5684	6.83251	0.00017394
hsa-miR-25-5p	-1.0686	0.00015241
hsa-miR-484	-1.06389	0.0155
hsa-miR-501-3p	-1.05753	0.000322
hsa-miR-532-3p	-1.04774	0.00130941
hsa-miR-28-3p	-1.04457	9.99e-06
hsa-miR-874-3p	-1.04287	0.00421
hsa-miR-221-5p	-1.0203	4.52e-05
hsa-miR-185-5p	-1.01415	0.0126405
hsa-miR-192-5p	-0.993231	0.000539337
hsa-miR-21-3p	-0.975041	0.00658014
hsa-miR-652-3p	-0.964528	0.00873641
hsa-miR-140-3p	-0.943238	0.0163642
hsa-miR-181b-5p,1	-0.922976	0.000914
hsa-let-7d-5p	-0.885193	0.00288
hsa-miR-181b-5p	-0.880302	0.00101062
hsa-miR-100-5p	-0.859397	0.00213314
hsa-miR-92a-3p	-0.83081	0.000575537
hsa-let-7b-5p	-0.826712	0.0034
hsa-miR-503-5p	-0.823121	0.00696272
hsa-miR-342-3p	-0.80359	0.0169
hsa-miR-23b-3p	-0.801564	0.00154763
hsa-miR-629-5p	-0.740626	0.0157339
hsa-miR-183-5p	-0.737324	0.00372732
hsa-miR-182-5p	-0.696565	0.00390421
hsa-miR-1275	-0.696081	0.0451414
hsa-miR-92a-3p,1	-0.650442	0.00874
hsa-miR-25-3p	-0.541905	0.0313963

## Sheet: Table 2Upregulated miRNAs invol
Supplementary table 2: Pathways involving upregulated miRNAs in spheroid-derived cancer stem cells from the NCI-H1975 cancer cell line
Term Name	Term Genes	miRNAs (n)	miRNA Names	Merged P-value	Merged FDR
Proteoglycans in cancer	220	15	hsa-miR-21-5p,hsa-miR-32-5p,hsa-miR-101-3p,hsa-miR-197-3p,hsa-miR-199a-3p,hsa-miR-148a-3p,hsa-miR-7-5p,hsa-miR-193a-3p,hsa-miR-423-3p,hsa-miR-92b-3p,hsa-miR-125a-3p,hsa-miR-423-5p,hsa-miR-450b-5p,hsa-miR-877-5p,hsa-miR-365b-5p	1.0369e-40	1.4206e-38
Cell cycle	129	15	hsa-miR-21-5p,hsa-miR-32-5p,hsa-miR-101-3p,hsa-miR-197-3p,hsa-miR-148a-3p,hsa-miR-7-5p,hsa-miR-146a-5p,hsa-miR-423-3p,hsa-miR-92b-3p,hsa-miR-671-5p,hsa-miR-125a-3p,hsa-miR-423-5p,hsa-miR-450b-5p,hsa-miR-1908-5p,hsa-miR-3615	6.3845e-40	4.3733e-38
Focal adhesion	213	15	hsa-miR-21-5p,hsa-miR-32-5p,hsa-miR-101-3p,hsa-miR-199a-3p,hsa-miR-148a-3p,hsa-miR-7-5p,hsa-miR-423-3p,hsa-miR-92b-3p,hsa-let-7a-3p,hsa-let-7b-3p,hsa-miR-125a-3p,hsa-miR-423-5p,hsa-miR-450b-5p,hsa-miR-877-5p,hsa-miR-1908-5p	3.2953e-39	1.5048e-37
FoxO signaling pathway	139	12	hsa-miR-21-5p,hsa-miR-32-5p,hsa-miR-101-3p,hsa-miR-148a-3p,hsa-miR-7-5p,hsa-miR-423-3p,hsa-miR-92b-3p,hsa-miR-671-5p,hsa-miR-125a-3p,hsa-miR-423-5p,hsa-miR-1290,hsa-miR-1908-5p	4.7471e-38	1.6259e-36
Pathways in cancer	555	12	hsa-miR-199a-3p,hsa-miR-148a-3p,hsa-miR-7-5p,hsa-miR-193a-3p,hsa-miR-423-3p,hsa-miR-92b-3p,hsa-let-7a-3p,hsa-let-7b-3p,hsa-miR-125a-3p,hsa-miR-423-5p,hsa-miR-450b-5p,hsa-miR-1908-5p	2.7288e-33	6.4237e-32
Chronic myeloid leukemia	79	11	hsa-miR-21-5p,hsa-miR-32-5p,hsa-miR-148a-3p,hsa-miR-7-5p,hsa-miR-423-3p,hsa-miR-92b-3p,hsa-miR-671-5p,hsa-miR-125a-3p,hsa-miR-423-5p,hsa-miR-1908-5p,hsa-miR-1343-3p	2.8133e-33	6.4237e-32
Hepatocellular carcinoma	177	12	hsa-miR-21-5p,hsa-miR-199a-3p,hsa-miR-7-5p,hsa-miR-423-3p,hsa-miR-92b-3p,hsa-miR-671-5p,hsa-miR-125a-3p,hsa-miR-423-5p,hsa-miR-450b-5p,hsa-miR-548o-3p,hsa-miR-1908-5p,hsa-miR-365b-5p	9.3518e-32	1.8303e-30
Adherens junction	79	10	hsa-miR-21-5p,hsa-miR-32-5p,hsa-miR-101-3p,hsa-miR-197-3p,hsa-miR-7-5p,hsa-miR-92b-3p,hsa-miR-125a-3p,hsa-miR-423-5p,hsa-miR-760,hsa-miR-365b-5p	2.0211e-28	3.4611e-27
p53 signaling pathway	75	9	hsa-miR-21-5p,hsa-miR-101-3p,hsa-miR-197-3p,hsa-miR-148a-3p,hsa-miR-7-5p,hsa-miR-92b-3p,hsa-miR-671-5p,hsa-miR-450b-5p,hsa-miR-1307-3p	1.5321e-24	2.2738e-23
Colorectal cancer	88	10	hsa-miR-32-5p,hsa-miR-101-3p,hsa-miR-199a-3p,hsa-miR-148a-3p,hsa-miR-7-5p,hsa-miR-151a-3p,hsa-miR-423-3p,hsa-miR-92b-3p,hsa-miR-125a-3p,hsa-miR-1908-5p	1.6597e-24	2.2738e-23
Regulation of actin cytoskeleton	224	9	hsa-miR-32-5p,hsa-miR-101-3p,hsa-miR-199a-3p,hsa-miR-148a-3p,hsa-miR-7-5p,hsa-miR-92b-3p,hsa-let-7a-3p,hsa-let-7b-3p,hsa-miR-423-5p	3.556e-24	4.4288e-23
Endocrine resistance	118	10	hsa-miR-21-5p,hsa-miR-32-5p,hsa-miR-148a-3p,hsa-miR-7-5p,hsa-miR-193a-3p,hsa-miR-423-3p,hsa-miR-423-5p,hsa-miR-1290,hsa-miR-1908-5p,hsa-miR-1343-3p	1.5058e-23	1.7191e-22
Prostate cancer	101	10	hsa-miR-21-5p,hsa-miR-32-5p,hsa-miR-148a-3p,hsa-miR-7-5p,hsa-miR-423-3p,hsa-miR-92b-3p,hsa-miR-125a-3p,hsa-miR-423-5p,hsa-miR-450b-5p,hsa-miR-1908-5p	1.755e-21	1.8495e-20
Protein processing in endoplasmic reticulum	194	7	hsa-miR-101-3p,hsa-miR-197-3p,hsa-miR-199a-3p,hsa-miR-7-5p,hsa-miR-423-3p,hsa-miR-671-5p,hsa-miR-450b-5p	5.5209e-21	5.4026e-20
Cellular senescence	219	9	hsa-miR-32-5p,hsa-miR-101-3p,hsa-miR-199a-3p,hsa-miR-148a-3p,hsa-miR-7-5p,hsa-miR-423-3p,hsa-miR-125a-3p,hsa-miR-423-5p,hsa-miR-1908-5p	4.4082e-20	4.0261e-19
MicroRNAs in cancer	334	7	hsa-miR-21-5p,hsa-miR-148a-3p,hsa-miR-7-5p,hsa-miR-193a-3p,hsa-miR-671-5p,hsa-let-7a-3p,hsa-let-7b-3p	5.2613e-20	4.505e-19
Hippo signaling pathway	164	8	hsa-miR-101-3p,hsa-miR-197-3p,hsa-miR-7-5p,hsa-miR-423-3p,hsa-miR-671-5p,hsa-let-7a-3p,hsa-miR-125a-3p,hsa-miR-423-5p	7.8632e-20	6.3368e-19
Shigellosis	268	10	hsa-miR-21-5p,hsa-miR-32-5p,hsa-miR-199a-3p,hsa-miR-148a-3p,hsa-miR-7-5p,hsa-miR-423-3p,hsa-miR-92b-3p,hsa-miR-423-5p,hsa-miR-450b-5p,hsa-miR-1908-5p	1.1657e-19	8.8721e-19
Bacterial invasion of epithelial cells	80	8	hsa-miR-21-5p,hsa-miR-32-5p,hsa-miR-199a-3p,hsa-miR-7-5p,hsa-miR-92b-3p,hsa-let-7b-3p,hsa-miR-423-5p,hsa-miR-450b-5p	5.8369e-19	4.2087e-18
PI3K-Akt signaling pathway	372	8	hsa-miR-101-3p,hsa-miR-148a-3p,hsa-miR-7-5p,hsa-miR-423-3p,hsa-let-7a-3p,hsa-miR-125a-3p,hsa-miR-450b-5p,hsa-miR-877-5p	1.7575e-18	1.2039e-17
Viral carcinogenesis	265	6	hsa-miR-101-3p,hsa-miR-197-3p,hsa-miR-148a-3p,hsa-miR-7-5p,hsa-miR-188-5p,hsa-miR-125a-3p	4.1399e-18	2.7008e-17
EGFR tyrosine kinase inhibitor resistance	82	8	hsa-miR-21-5p,hsa-miR-32-5p,hsa-miR-7-5p,hsa-miR-486-5p,hsa-miR-92b-3p,hsa-miR-423-5p,hsa-miR-450b-5p,hsa-miR-1908-5p	8.0616e-18	5.0202e-17
Renal cell carcinoma	70	7	hsa-miR-101-3p,hsa-miR-199a-3p,hsa-miR-148a-3p,hsa-miR-7-5p,hsa-miR-92b-3p,hsa-miR-423-5p,hsa-miR-450b-5p	3.8759e-17	2.3087e-16
Thyroid hormone signaling pathway	137	9	hsa-miR-21-5p,hsa-miR-32-5p,hsa-miR-101-3p,hsa-miR-148a-3p,hsa-miR-7-5p,hsa-miR-423-3p,hsa-miR-92b-3p,hsa-miR-125a-3p,hsa-miR-423-5p	9.2448e-17	5.2773e-16
Glioma	79	7	hsa-miR-148a-3p,hsa-miR-7-5p,hsa-miR-92b-3p,hsa-miR-671-5p,hsa-miR-423-5p,hsa-miR-1908-5p,hsa-miR-1343-3p	1.0727e-16	5.8785e-16
Endocytosis	311	5	hsa-miR-148a-3p,hsa-miR-7-5p,hsa-miR-574-3p,hsa-let-7b-3p,hsa-miR-1290	1.2095e-15	6.3732e-15
Hepatitis B	177	8	hsa-miR-21-5p,hsa-miR-32-5p,hsa-miR-199a-3p,hsa-miR-148a-3p,hsa-miR-7-5p,hsa-miR-423-3p,hsa-miR-92b-3p,hsa-miR-1908-5p	1.5299e-15	7.7627e-15
Salmonella infection	277	5	hsa-miR-7-5p,hsa-miR-423-3p,hsa-miR-125a-3p,hsa-miR-423-5p,hsa-miR-365b-5p	3.3334e-15	1.631e-14
Oocyte meiosis	134	5	hsa-miR-101-3p,hsa-miR-197-3p,hsa-miR-148a-3p,hsa-miR-671-5p,hsa-miR-1910-5p	3.5379e-15	1.6714e-14
ErbB signaling pathway	86	5	hsa-miR-32-5p,hsa-miR-7-5p,hsa-miR-92b-3p,hsa-miR-450b-5p,hsa-miR-1908-5p	1.1605e-14	5.2995e-14
Neurotrophin signaling pathway	124	6	hsa-miR-21-5p,hsa-miR-101-3p,hsa-miR-7-5p,hsa-miR-423-5p,hsa-miR-450b-5p,hsa-miR-1908-5p	2.222e-14	9.8198e-14
Bladder cancer	43	6	hsa-miR-148a-3p,hsa-miR-7-5p,hsa-miR-423-3p,hsa-miR-92b-3p,hsa-miR-671-5p,hsa-miR-423-5p	2.8307e-14	1.2119e-13
Human papillomavirus infection	406	5	hsa-miR-148a-3p,hsa-miR-7-5p,hsa-let-7a-3p,hsa-let-7b-3p,hsa-miR-125a-3p	3.1694e-14	1.3158e-13
Autophagy - animal	146	6	hsa-miR-32-5p,hsa-miR-199a-3p,hsa-miR-148a-3p,hsa-miR-7-5p,hsa-miR-125a-3p,hsa-miR-1908-5p	9.0967e-14	3.6654e-13
Endometrial cancer	61	7	hsa-miR-32-5p,hsa-miR-7-5p,hsa-miR-423-3p,hsa-miR-92b-3p,hsa-miR-125a-3p,hsa-miR-423-5p,hsa-miR-1908-5p	1.7518e-13	6.8569e-13
Amyotrophic lateral sclerosis	408	5	hsa-miR-101-3p,hsa-miR-7-5p,hsa-miR-122-5p,hsa-miR-423-3p,hsa-miR-193a-5p	1.9939e-13	7.588e-13
Ubiquitin mediated proteolysis	142	5	hsa-miR-32-5p,hsa-miR-101-3p,hsa-miR-148a-3p,hsa-miR-7-5p,hsa-miR-423-3p	3.7327e-13	1.3821e-12
MAPK signaling pathway	329	6	hsa-miR-21-5p,hsa-miR-101-3p,hsa-miR-148a-3p,hsa-miR-92b-3p,hsa-miR-423-5p,hsa-miR-450b-5p	9.2057e-13	3.3189e-12
cGMP-PKG signaling pathway	175	6	hsa-miR-101-3p,hsa-miR-197-3p,hsa-miR-7-5p,hsa-miR-423-3p,hsa-miR-574-5p,hsa-miR-450b-5p	1.0174e-12	3.5741e-12
Progesterone-mediated oocyte maturation	104	5	hsa-miR-101-3p,hsa-miR-199a-3p,hsa-miR-148a-3p,hsa-miR-92b-3p,hsa-miR-1910-5p	1.0914e-12	3.7381e-12
AMPK signaling pathway	130	5	hsa-miR-148a-3p,hsa-miR-7-5p,hsa-miR-151a-3p,hsa-miR-423-5p,hsa-miR-1908-5p	3.5094e-12	1.1727e-11
Signaling pathways regulating pluripotency of stem cells	156	4	hsa-miR-32-5p,hsa-miR-148a-3p,hsa-miR-7-5p,hsa-miR-92b-3p	4.0098e-12	1.308e-11
Insulin signaling pathway	153	5	hsa-miR-148a-3p,hsa-miR-7-5p,hsa-miR-423-5p,hsa-miR-1290,hsa-miR-1908-5p	4.1899e-12	1.3349e-11
Apelin signaling pathway	140	5	hsa-miR-101-3p,hsa-miR-92b-3p,hsa-miR-671-5p,hsa-miR-450b-5p,hsa-miR-1290	2.5159e-11	7.8336e-11
Alzheimer disease	426	3	hsa-miR-7-5p,hsa-miR-122-5p,hsa-miR-1908-5p	3.3356e-11	1.0155e-10
HIF-1 signaling pathway	112	3	hsa-miR-148a-3p,hsa-miR-7-5p,hsa-miR-125a-3p	5.2003e-11	1.5488e-10
Oxytocin signaling pathway	161	5	hsa-miR-101-3p,hsa-miR-7-5p,hsa-miR-671-5p,hsa-miR-450b-5p,hsa-miR-1290	6.7978e-11	1.9815e-10
Gastric cancer	162	5	hsa-miR-7-5p,hsa-miR-423-3p,hsa-miR-92b-3p,hsa-miR-125a-3p,hsa-miR-1908-5p	7.6649e-11	2.1877e-10
TGF-beta signaling pathway	103	4	hsa-miR-101-3p,hsa-miR-148a-3p,hsa-miR-92b-3p,hsa-miR-125a-3p	9.5713e-11	2.6761e-10
Small cell lung cancer	100	4	hsa-miR-7-5p,hsa-let-7a-3p,hsa-let-7b-3p,hsa-miR-1908-5p	1.1005e-10	3.0153e-10
Non-small cell lung cancer	81	4	hsa-miR-21-5p,hsa-miR-199a-3p,hsa-miR-148a-3p,hsa-miR-7-5p	3.3921e-10	9.1122e-10
Pancreatic cancer	78	4	hsa-miR-199a-3p,hsa-miR-148a-3p,hsa-miR-7-5p,hsa-miR-548o-3p	3.9065e-10	1.0292e-09
Lysine degradation	69	4	hsa-miR-21-5p,hsa-miR-7-5p,hsa-miR-92b-3p,hsa-miR-1908-5p	4.3757e-10	1.1311e-09
Breast cancer	163	4	hsa-miR-148a-3p,hsa-miR-7-5p,hsa-miR-92b-3p,hsa-miR-423-5p	7.6979e-10	1.953e-09
Transcriptional misregulation in cancer	206	5	hsa-miR-21-5p,hsa-miR-148a-3p,hsa-miR-7-5p,hsa-miR-423-3p,hsa-miR-423-5p	7.9905e-10	1.9904e-09
Longevity regulating pathway	105	4	hsa-miR-32-5p,hsa-miR-7-5p,hsa-miR-1290,hsa-miR-1908-5p	8.8858e-10	2.1739e-09
Hepatitis C	173	3	hsa-miR-7-5p,hsa-miR-1303,hsa-miR-1908-5p	9.3094e-10	2.2375e-09
Growth hormone synthesis, secretion and action	129	4	hsa-miR-32-5p,hsa-miR-148a-3p,hsa-miR-7-5p,hsa-miR-92b-3p	1.4591e-09	3.4465e-09
Longevity regulating pathway - multiple species	79	4	hsa-miR-7-5p,hsa-miR-423-3p,hsa-miR-671-5p,hsa-miR-1290	1.9425e-09	4.5104e-09
Rap1 signaling pathway	214	4	hsa-miR-101-3p,hsa-miR-7-5p,hsa-let-7b-3p,hsa-miR-450b-5p	3.3502e-09	7.6497e-09
Prion disease	331	3	hsa-miR-21-5p,hsa-miR-122-5p,hsa-miR-1908-5p	4.4869e-09	1.0077e-08
Ras signaling pathway	241	3	hsa-miR-101-3p,hsa-miR-7-5p,hsa-miR-450b-5p	6.2604e-09	1.3833e-08
cAMP signaling pathway	226	3	hsa-miR-7-5p,hsa-miR-574-5p,hsa-miR-1908-5p	7.4218e-09	1.614e-08
Prolactin signaling pathway	73	4	hsa-miR-21-5p,hsa-miR-32-5p,hsa-miR-148a-3p,hsa-miR-7-5p	7.7351e-09	1.6558e-08
Long-term potentiation	71	2	hsa-miR-101-3p,hsa-miR-7-5p	1.6007e-08	3.3226e-08
Pathogenic Escherichia coli infection	222	4	hsa-miR-32-5p,hsa-miR-101-3p,hsa-miR-199a-3p,hsa-miR-7-5p	1.5959e-08	3.3226e-08
Thermogenesis	252	3	hsa-miR-122-5p,hsa-miR-423-5p,hsa-miR-1908-5p	2.3344e-08	4.7733e-08
Tight junction	182	4	hsa-miR-101-3p,hsa-miR-7-5p,hsa-let-7a-3p,hsa-miR-423-5p	3.9469e-08	7.9517e-08
Thyroid cancer	43	4	hsa-miR-21-5p,hsa-miR-423-3p,hsa-miR-92b-3p,hsa-miR-125a-3p	6.5306e-08	1.2967e-07
Spinocerebellar ataxia	145	4	hsa-miR-32-5p,hsa-miR-7-5p,hsa-miR-423-3p,hsa-miR-1908-5p	1.4373e-07	2.8131e-07
Relaxin signaling pathway	138	4	hsa-miR-32-5p,hsa-miR-148a-3p,hsa-miR-92b-3p,hsa-miR-423-5p	1.4669e-07	2.8305e-07
AGE-RAGE signaling pathway in diabetic complications	115	3	hsa-miR-7-5p,hsa-miR-125a-3p,hsa-miR-1908-5p	1.7296e-07	3.291e-07
Vasopressin-regulated water reabsorption	47	2	hsa-miR-574-3p,hsa-miR-423-5p	1.9457e-07	3.6515e-07
Ferroptosis	41	2	hsa-miR-32-5p,hsa-miR-92b-3p	2.79e-07	5.1652e-07
Oxidative phosphorylation	157	1	hsa-miR-122-5p	3.404e-07	6.2179e-07
Melanogenesis	107	3	hsa-miR-7-5p,hsa-miR-92b-3p,hsa-miR-423-5p	4.4311e-07	7.9876e-07
Alcoholism	195	3	hsa-miR-7-5p,hsa-miR-423-3p,hsa-miR-760	8.7404e-07	1.5551e-06
GnRH signaling pathway	97	3	hsa-miR-7-5p,hsa-miR-423-5p,hsa-miR-1908-5p	9.1914e-07	1.6144e-06
Sphingolipid signaling pathway	133	3	hsa-miR-101-3p,hsa-miR-7-5p,hsa-miR-1908-5p	1.1192e-06	1.9409e-06
Central carbon metabolism in cancer	74	3	hsa-miR-148a-3p,hsa-miR-125a-3p,hsa-miR-1908-5p	1.7986e-06	3.08e-06
Human immunodeficiency virus 1 infection	277	3	hsa-miR-101-3p,hsa-miR-148a-3p,hsa-miR-92b-3p	2.1449e-06	3.6277e-06
Yersinia infection	147	3	hsa-miR-32-5p,hsa-miR-101-3p,hsa-miR-92b-3p	2.6432e-06	4.416e-06
Acute myeloid leukemia	69	3	hsa-miR-7-5p,hsa-miR-423-3p,hsa-miR-1908-5p	3.2996e-06	5.4464e-06
mRNA surveillance pathway	108	2	hsa-miR-1908-5p,hsa-miR-3615	3.4362e-06	5.6043e-06
Melanoma	76	2	hsa-miR-7-5p,hsa-miR-92b-3p	3.9094e-06	6.3011e-06
Axon guidance	186	2	hsa-miR-7-5p,hsa-miR-1908-5p	6.8405e-06	1.0897e-05
Fluid shear stress and atherosclerosis	149	3	hsa-miR-101-3p,hsa-miR-7-5p,hsa-miR-423-3p	6.9623e-06	1.0964e-05
Parkinson disease	282	2	hsa-miR-122-5p,hsa-miR-1908-5p	7.4589e-06	1.1612e-05
Gap junction	99	2	hsa-miR-101-3p,hsa-miR-148a-3p	1.0117e-05	1.5573e-05
ECM-receptor interaction	104	2	hsa-let-7a-3p,hsa-let-7b-3p	1.0754e-05	1.637e-05
Circadian rhythm	31	2	hsa-miR-32-5p,hsa-miR-1290	1.3251e-05	1.9949e-05
N-Glycan biosynthesis	51	1	hsa-miR-423-5p	1.376e-05	2.0491e-05
Cushing syndrome	176	2	hsa-miR-7-5p,hsa-miR-423-5p	1.4644e-05	2.1573e-05
Dopaminergic synapse	143	1	hsa-miR-101-3p	1.486e-05	2.1657e-05
Huntington disease	339	2	hsa-miR-21-5p,hsa-miR-122-5p	1.6178e-05	2.3331e-05
Pathways of neurodegeneration - multiple diseases	539	2	hsa-miR-7-5p,hsa-miR-423-3p	1.697e-05	2.4218e-05
Neutrophil extracellular trap formation	205	2	hsa-miR-423-3p,hsa-miR-760	1.9381e-05	2.7374e-05
Measles	161	2	hsa-miR-7-5p,hsa-miR-1303	2.0208e-05	2.8251e-05
Platinum drug resistance	75	2	hsa-miR-7-5p,hsa-miR-423-3p	2.5183e-05	3.4849e-05
Type II diabetes mellitus	57	2	hsa-miR-125a-3p,hsa-miR-1908-5p	3.2599e-05	4.466e-05
Parathyroid hormone synthesis, secretion and action	118	2	hsa-miR-7-5p,hsa-miR-423-5p	4.0459e-05	5.488e-05
mTOR signaling pathway	177	2	hsa-miR-148a-3p,hsa-miR-7-5p	5.9689e-05	8.017e-05
C-type lectin receptor signaling pathway	116	2	hsa-miR-7-5p,hsa-miR-1908-5p	0.00010425	0.00013866
Apoptosis	151	2	hsa-miR-7-5p,hsa-miR-450b-5p	0.00011842	0.00015451
Glutamatergic synapse	117	1	hsa-miR-101-3p	0.00011752	0.00015451
Glucagon signaling pathway	114	2	hsa-miR-7-5p,hsa-miR-423-5p	0.00013569	0.00017538
GnRH secretion	74	1	hsa-miR-1908-5p	0.00020107	0.00025685
Arrhythmogenic right ventricular cardiomyopathy	79	1	hsa-miR-365b-5p	0.00020248	0.00025685
Various types of N-glycan biosynthesis	40	1	hsa-miR-423-5p	0.00023892	0.0003003
Hedgehog signaling pathway	59	1	hsa-miR-101-3p	0.00029799	0.00037113
Phosphatidylinositol signaling system	101	1	hsa-miR-877-5p	0.00035457	0.00043763
Endocrine and other factor-regulated calcium reabsorption	57	1	hsa-miR-574-5p	0.00043638	0.00053378
Nicotine addiction	42	1	hsa-miR-574-5p	0.00049363	0.00059847
Insulin resistance	124	1	hsa-miR-1908-5p	0.00055663	0.00066894
Biotin metabolism	3	1	hsa-miR-7-5p	0.00060223	0.00071744
Steroid biosynthesis	22	1	hsa-miR-148a-3p	0.00073006	0.00086223
Choline metabolism in cancer	106	1	hsa-miR-32-5p	0.00090044	0.00105436
Human cytomegalovirus infection	306	1	hsa-miR-148a-3p	0.00097494	0.00113192
Regulation of lipolysis in adipocytes	61	1	hsa-miR-148a-3p	0.00141195	0.00162552
Estrogen signaling pathway	167	1	hsa-miR-423-5p	0.00184755	0.00210928
Fc epsilon RI signaling pathway	79	1	hsa-miR-1908-5p	0.00213279	0.00241481
Chagas disease	116	1	hsa-miR-1908-5p	0.00218073	0.00244885
TNF signaling pathway	131	1	hsa-miR-32-5p	0.00258551	0.0028798
Amphetamine addiction	74	1	hsa-miR-101-3p	0.00276051	0.00304992
Platelet activation	136	1	hsa-miR-125a-3p	0.00336432	0.00368729
Adrenergic signaling in cardiomyocytes	161	1	hsa-miR-101-3p	0.00366171	0.00398139
Fanconi anemia pathway	56	1	hsa-miR-92b-3p	0.00369276	0.00398353
Mineral absorption	62	1	hsa-miR-32-5p	0.00382975	0.00409903
PD-L1 expression and PD-1 checkpoint pathway in cancer	101	1	hsa-miR-7-5p	0.00448443	0.00476253
Aldosterone-regulated sodium reabsorption	37	1	hsa-miR-148a-3p	0.00473215	0.00498696
Mitophagy - animal	76	1	hsa-miR-32-5p	0.00486528	0.00508812
Fc gamma R-mediated phagocytosis	101	1	hsa-miR-32-5p	0.00498627	0.00517514
Inflammatory mediator regulation of TRP channels	101	1	hsa-miR-1908-5p	0.00614141	0.00632611
Long-term depression	64	1	hsa-miR-7-5p	0.00666361	0.0068128
RNA degradation	101	1	hsa-miR-148a-3p	0.00681641	0.00691739
Kaposi sarcoma-associated herpesvirus infection	245	1	hsa-miR-7-5p	0.00866558	0.0087293
Leukocyte transendothelial migration	120	1	hsa-miR-7-5p	0.011758	0.011758

## Sheet: Table 3Downregulated miRNAs inv
Supplementary table 3: Pathways involving downregulated miRNAs in spheroid-derived cancer stem cells from the NCI-H1975 cancer cell line
Term Name	Term Genes	miRNAs (n)	miRNA Names	Merged P-value	Merged FDR
Cell cycle	129	36	hsa-let-7b-5p,hsa-let-7d-5p,hsa-miR-16-5p,hsa-miR-20a-5p,hsa-miR-25-3p,hsa-miR-29a-3p,hsa-miR-92a-3p,hsa-miR-93-5p,hsa-miR-107,hsa-miR-10b-5p,hsa-miR-182-5p,hsa-miR-183-5p,hsa-miR-203a-3p,hsa-miR-212-3p,hsa-miR-221-3p,hsa-miR-224-5p,hsa-miR-200b-3p,hsa-miR-23b-3p,hsa-miR-125b-5p,hsa-miR-130a-3p,hsa-miR-185-5p,hsa-miR-200c-3p,hsa-miR-34c-5p,hsa-miR-130b-3p,hsa-miR-375-3p,hsa-miR-378a-3p,hsa-miR-34…	3.5155e-130	5.8006e-128
Pathways in cancer	555	30	hsa-let-7b-5p,hsa-let-7d-5p,hsa-miR-16-5p,hsa-miR-20a-5p,hsa-miR-25-3p,hsa-miR-29a-3p,hsa-miR-31-5p,hsa-miR-92a-3p,hsa-miR-93-5p,hsa-miR-107,hsa-miR-10b-5p,hsa-miR-182-5p,hsa-miR-183-5p,hsa-miR-203a-3p,hsa-miR-212-3p,hsa-miR-221-3p,hsa-miR-224-5p,hsa-miR-200b-3p,hsa-miR-23b-3p,hsa-miR-125b-5p,hsa-miR-130a-3p,hsa-miR-141-3p,hsa-miR-200c-3p,hsa-miR-130b-3p,hsa-miR-361-5p,hsa-miR-378a-3p,hsa-miR-345…	2.0222e-99	1.66833e-97
Proteoglycans in cancer	220	31	hsa-let-7b-5p,hsa-let-7d-5p,hsa-miR-16-5p,hsa-miR-20a-5p,hsa-miR-25-3p,hsa-miR-29a-3p,hsa-miR-31-5p,hsa-miR-92a-3p,hsa-miR-93-5p,hsa-miR-100-5p,hsa-miR-107,hsa-miR-10b-5p,hsa-miR-183-5p,hsa-miR-203a-3p,hsa-miR-212-3p,hsa-miR-221-3p,hsa-miR-224-5p,hsa-miR-200b-3p,hsa-miR-23b-3p,hsa-miR-125b-5p,hsa-miR-130a-3p,hsa-miR-200c-3p,hsa-miR-34c-5p,hsa-miR-130b-3p,hsa-miR-361-5p,hsa-miR-378a-3p,hsa-miR-452…	2.95381e-88	1.62459e-86
p53 signaling pathway	75	28	hsa-let-7b-5p,hsa-let-7d-5p,hsa-miR-16-5p,hsa-miR-20a-5p,hsa-miR-25-3p,hsa-miR-29a-3p,hsa-miR-92a-3p,hsa-miR-93-5p,hsa-miR-107,hsa-miR-10b-5p,hsa-miR-181b-5p,hsa-miR-182-5p,hsa-miR-183-5p,hsa-miR-221-3p,hsa-miR-224-5p,hsa-miR-200b-3p,hsa-miR-23b-3p,hsa-miR-130a-3p,hsa-miR-141-3p,hsa-miR-200c-3p,hsa-miR-34c-5p,hsa-miR-378a-3p,hsa-miR-342-3p,hsa-miR-484,hsa-miR-181d-5p,hsa-miR-503-5p,hsa-miR-577,hs…	6.12432e-86	2.52628e-84
Prostate cancer	101	30	hsa-let-7b-5p,hsa-let-7d-5p,hsa-miR-16-5p,hsa-miR-20a-5p,hsa-miR-25-3p,hsa-miR-29a-3p,hsa-miR-92a-3p,hsa-miR-93-5p,hsa-miR-107,hsa-miR-10b-5p,hsa-miR-182-5p,hsa-miR-183-5p,hsa-miR-205-5p,hsa-miR-212-3p,hsa-miR-221-3p,hsa-miR-224-5p,hsa-miR-200b-3p,hsa-miR-23b-3p,hsa-miR-125b-5p,hsa-miR-130a-3p,hsa-miR-141-3p,hsa-miR-200c-3p,hsa-miR-130b-3p,hsa-miR-378a-3p,hsa-miR-345-5p,hsa-miR-452-5p,hsa-miR-503…	1.93527e-75	6.38638e-74
FoxO signaling pathway	139	24	hsa-let-7b-5p,hsa-let-7d-5p,hsa-miR-16-5p,hsa-miR-20a-5p,hsa-miR-25-3p,hsa-miR-29a-3p,hsa-miR-92a-3p,hsa-miR-93-5p,hsa-miR-107,hsa-miR-10b-5p,hsa-miR-182-5p,hsa-miR-183-5p,hsa-miR-203a-3p,hsa-miR-221-3p,hsa-miR-224-5p,hsa-miR-200b-3p,hsa-miR-23b-3p,hsa-miR-130a-3p,hsa-miR-141-3p,hsa-miR-200c-3p,hsa-miR-130b-3p,hsa-miR-375-3p,hsa-miR-378a-3p,hsa-miR-532-3p	2.69099e-75	7.40022e-74
Focal adhesion	213	27	hsa-let-7d-5p,hsa-miR-16-5p,hsa-miR-20a-5p,hsa-miR-25-3p,hsa-miR-29a-3p,hsa-miR-92a-3p,hsa-miR-93-5p,hsa-miR-107,hsa-miR-182-5p,hsa-miR-183-5p,hsa-miR-203a-3p,hsa-miR-221-3p,hsa-miR-224-5p,hsa-miR-200b-3p,hsa-miR-23b-3p,hsa-miR-125b-5p,hsa-miR-130a-3p,hsa-miR-200c-3p,hsa-miR-34c-5p,hsa-miR-378a-3p,hsa-miR-452-5p,hsa-miR-484,hsa-miR-21-3p,hsa-miR-27a-5p,hsa-miR-92a-1-5p,hsa-miR-221-5p,hsa-miR-532-…	2.41e-74	5.68072e-73
Protein processing in endoplasmic reticulum	194	28	hsa-let-7b-5p,hsa-let-7d-5p,hsa-miR-16-5p,hsa-miR-20a-5p,hsa-miR-25-3p,hsa-miR-29a-3p,hsa-miR-92a-3p,hsa-miR-93-5p,hsa-miR-107,hsa-miR-181b-5p,hsa-miR-182-5p,hsa-miR-203a-3p,hsa-miR-221-3p,hsa-miR-224-5p,hsa-miR-200b-3p,hsa-miR-23b-3p,hsa-miR-141-3p,hsa-miR-200c-3p,hsa-miR-361-5p,hsa-miR-375-3p,hsa-miR-378a-3p,hsa-miR-345-5p,hsa-miR-181d-5p,hsa-miR-503-5p,hsa-miR-21-3p,hsa-miR-27a-5p,hsa-miR-141-…	3.02873e-72	6.24675e-71
Chronic myeloid leukemia	79	25	hsa-let-7b-5p,hsa-let-7d-5p,hsa-miR-16-5p,hsa-miR-20a-5p,hsa-miR-25-3p,hsa-miR-29a-3p,hsa-miR-92a-3p,hsa-miR-93-5p,hsa-miR-107,hsa-miR-10b-5p,hsa-miR-182-5p,hsa-miR-183-5p,hsa-miR-212-3p,hsa-miR-221-3p,hsa-miR-224-5p,hsa-miR-200b-3p,hsa-miR-23b-3p,hsa-miR-130a-3p,hsa-miR-141-3p,hsa-miR-200c-3p,hsa-miR-34c-5p,hsa-miR-130b-3p,hsa-miR-378a-3p,hsa-miR-27a-5p,hsa-miR-532-3p	2.89582e-71	5.309e-70
Hippo signaling pathway	164	26	hsa-let-7b-5p,hsa-let-7d-5p,hsa-miR-16-5p,hsa-miR-20a-5p,hsa-miR-25-3p,hsa-miR-29a-3p,hsa-miR-31-5p,hsa-miR-92a-3p,hsa-miR-93-5p,hsa-miR-107,hsa-miR-182-5p,hsa-miR-183-5p,hsa-miR-203a-3p,hsa-miR-212-3p,hsa-miR-224-5p,hsa-miR-200b-3p,hsa-miR-125b-5p,hsa-miR-130a-3p,hsa-miR-185-5p,hsa-miR-200c-3p,hsa-miR-34c-5p,hsa-miR-130b-3p,hsa-miR-342-3p,hsa-miR-452-5p,hsa-miR-1260a,hsa-miR-1260b	3.94751e-71	6.51339e-70
Ubiquitin mediated proteolysis	142	22	hsa-let-7b-5p,hsa-let-7d-5p,hsa-miR-16-5p,hsa-miR-20a-5p,hsa-miR-92a-3p,hsa-miR-93-5p,hsa-miR-107,hsa-miR-10b-5p,hsa-miR-181b-5p,hsa-miR-203a-3p,hsa-miR-212-3p,hsa-miR-221-3p,hsa-miR-224-5p,hsa-miR-200b-3p,hsa-miR-23b-3p,hsa-miR-130a-3p,hsa-miR-141-3p,hsa-miR-200c-3p,hsa-miR-361-5p,hsa-miR-452-5p,hsa-miR-21-3p,hsa-miR-532-3p	4.58905e-66	6.88358e-65
Shigellosis	268	26	hsa-let-7b-5p,hsa-let-7d-5p,hsa-miR-16-5p,hsa-miR-20a-5p,hsa-miR-29a-3p,hsa-miR-31-5p,hsa-miR-92a-3p,hsa-miR-93-5p,hsa-miR-107,hsa-miR-182-5p,hsa-miR-183-5p,hsa-miR-203a-3p,hsa-miR-212-3p,hsa-miR-200b-3p,hsa-miR-23b-3p,hsa-miR-130a-3p,hsa-miR-141-3p,hsa-miR-200c-3p,hsa-miR-130b-3p,hsa-miR-361-5p,hsa-miR-378a-3p,hsa-miR-652-3p,hsa-miR-27a-5p,hsa-miR-92a-1-5p,hsa-miR-532-3p,hsa-miR-378c	5.59478e-64	7.69282e-63
Colorectal cancer	88	23	hsa-let-7b-5p,hsa-let-7d-5p,hsa-miR-16-5p,hsa-miR-20a-5p,hsa-miR-25-3p,hsa-miR-29a-3p,hsa-miR-92a-3p,hsa-miR-93-5p,hsa-miR-107,hsa-miR-181b-5p,hsa-miR-182-5p,hsa-miR-183-5p,hsa-miR-212-3p,hsa-miR-221-3p,hsa-miR-224-5p,hsa-miR-200b-3p,hsa-miR-125b-5p,hsa-miR-130a-3p,hsa-miR-200c-3p,hsa-miR-378a-3p,hsa-miR-345-5p,hsa-miR-181d-5p,hsa-miR-577	3.40636e-62	4.32346e-61
Adherens junction	79	24	hsa-let-7b-5p,hsa-let-7d-5p,hsa-miR-16-5p,hsa-miR-20a-5p,hsa-miR-25-3p,hsa-miR-29a-3p,hsa-miR-31-5p,hsa-miR-92a-3p,hsa-miR-93-5p,hsa-miR-107,hsa-miR-182-5p,hsa-miR-183-5p,hsa-miR-221-3p,hsa-miR-200b-3p,hsa-miR-23b-3p,hsa-miR-141-3p,hsa-miR-361-5p,hsa-miR-378a-3p,hsa-miR-484,hsa-miR-27a-5p,hsa-miR-28-3p,hsa-miR-221-5p,hsa-miR-502-3p,hsa-miR-532-3p	2.74373e-60	3.23368e-59
Hepatocellular carcinoma	177	23	hsa-let-7b-5p,hsa-let-7d-5p,hsa-miR-16-5p,hsa-miR-20a-5p,hsa-miR-25-3p,hsa-miR-29a-3p,hsa-miR-92a-3p,hsa-miR-93-5p,hsa-miR-107,hsa-miR-10b-5p,hsa-miR-182-5p,hsa-miR-183-5p,hsa-miR-221-3p,hsa-miR-224-5p,hsa-miR-125b-5p,hsa-miR-130a-3p,hsa-miR-130b-3p,hsa-miR-378a-3p,hsa-miR-345-5p,hsa-miR-27a-5p,hsa-miR-221-5p,hsa-miR-532-3p,hsa-miR-625-3p	1.96479e-58	2.16127e-57
Regulation of actin cytoskeleton	224	22	hsa-let-7b-5p,hsa-let-7d-5p,hsa-miR-16-5p,hsa-miR-20a-5p,hsa-miR-25-3p,hsa-miR-29a-3p,hsa-miR-92a-3p,hsa-miR-93-5p,hsa-miR-107,hsa-miR-183-5p,hsa-miR-224-5p,hsa-miR-200b-3p,hsa-miR-23b-3p,hsa-miR-125b-5p,hsa-miR-200c-3p,hsa-miR-361-5p,hsa-miR-378a-3p,hsa-miR-452-5p,hsa-miR-21-3p,hsa-miR-92a-1-5p,hsa-miR-221-5p,hsa-miR-532-3p	6.7454e-56	6.95619e-55
Bacterial invasion of epithelial cells	80	23	hsa-let-7b-5p,hsa-miR-16-5p,hsa-miR-29a-3p,hsa-miR-31-5p,hsa-miR-92a-3p,hsa-miR-93-5p,hsa-miR-107,hsa-miR-182-5p,hsa-miR-183-5p,hsa-miR-203a-3p,hsa-miR-221-3p,hsa-miR-224-5p,hsa-miR-200b-3p,hsa-miR-23b-3p,hsa-miR-125b-5p,hsa-miR-130a-3p,hsa-miR-141-3p,hsa-miR-200c-3p,hsa-miR-130b-3p,hsa-miR-361-5p,hsa-miR-378a-3p,hsa-miR-21-3p,hsa-miR-92a-1-5p	1.46852e-55	1.42533e-54
Cellular senescence	219	23	hsa-let-7d-5p,hsa-miR-16-5p,hsa-miR-20a-5p,hsa-miR-25-3p,hsa-miR-29a-3p,hsa-miR-31-5p,hsa-miR-92a-3p,hsa-miR-93-5p,hsa-miR-107,hsa-miR-10b-5p,hsa-miR-182-5p,hsa-miR-183-5p,hsa-miR-212-3p,hsa-miR-221-3p,hsa-miR-224-5p,hsa-miR-200b-3p,hsa-miR-23b-3p,hsa-miR-130a-3p,hsa-miR-200c-3p,hsa-miR-34c-5p,hsa-miR-378a-3p,hsa-miR-503-5p,hsa-miR-577	2.85317e-54	2.6154e-53
PI3K-Akt signaling pathway	372	20	hsa-let-7b-5p,hsa-let-7d-5p,hsa-miR-16-5p,hsa-miR-20a-5p,hsa-miR-25-3p,hsa-miR-29a-3p,hsa-miR-93-5p,hsa-miR-10b-5p,hsa-miR-182-5p,hsa-miR-183-5p,hsa-miR-203a-3p,hsa-miR-221-3p,hsa-miR-224-5p,hsa-miR-200b-3p,hsa-miR-23b-3p,hsa-miR-130a-3p,hsa-miR-141-3p,hsa-miR-200c-3p,hsa-miR-200a-3p,hsa-miR-375-3p	6.70131e-54	5.81955e-53
Autophagy - animal	146	16	hsa-let-7b-5p,hsa-let-7d-5p,hsa-miR-16-5p,hsa-miR-20a-5p,hsa-miR-29a-3p,hsa-miR-93-5p,hsa-miR-107,hsa-miR-182-5p,hsa-miR-183-5p,hsa-miR-200b-3p,hsa-miR-23b-3p,hsa-miR-130a-3p,hsa-miR-200c-3p,hsa-miR-130b-3p,hsa-miR-378a-3p,hsa-miR-21-3p	1.36563e-49	1.12664e-48
Salmonella infection	277	20	hsa-let-7b-5p,hsa-let-7d-5p,hsa-miR-16-5p,hsa-miR-20a-5p,hsa-miR-29a-3p,hsa-miR-92a-3p,hsa-miR-93-5p,hsa-miR-107,hsa-miR-182-5p,hsa-miR-183-5p,hsa-miR-23b-3p,hsa-miR-125b-5p,hsa-miR-130a-3p,hsa-miR-138-5p,hsa-miR-149-5p,hsa-miR-200c-3p,hsa-miR-378a-3p,hsa-miR-21-3p,hsa-miR-27a-5p,hsa-miR-221-5p	3.95067e-47	3.1041e-46
Small cell lung cancer	100	18	hsa-let-7b-5p,hsa-let-7d-5p,hsa-miR-16-5p,hsa-miR-20a-5p,hsa-miR-29a-3p,hsa-miR-92a-3p,hsa-miR-107,hsa-miR-182-5p,hsa-miR-221-3p,hsa-miR-200b-3p,hsa-miR-23b-3p,hsa-miR-130a-3p,hsa-miR-200c-3p,hsa-miR-34c-5p,hsa-miR-130b-3p,hsa-miR-452-5p,hsa-miR-503-5p,hsa-miR-532-3p	3.46861e-43	2.60146e-42
Neurotrophin signaling pathway	124	17	hsa-let-7b-5p,hsa-miR-16-5p,hsa-miR-20a-5p,hsa-miR-29a-3p,hsa-miR-31-5p,hsa-miR-93-5p,hsa-miR-107,hsa-miR-10b-5p,hsa-miR-182-5p,hsa-miR-212-3p,hsa-miR-200b-3p,hsa-miR-23b-3p,hsa-miR-125b-5p,hsa-miR-141-3p,hsa-miR-185-5p,hsa-miR-200c-3p,hsa-miR-27a-5p	5.09957e-43	3.65839e-42
Renal cell carcinoma	70	17	hsa-let-7d-5p,hsa-miR-16-5p,hsa-miR-20a-5p,hsa-miR-25-3p,hsa-miR-29a-3p,hsa-miR-92a-3p,hsa-miR-93-5p,hsa-miR-107,hsa-miR-181b-5p,hsa-miR-182-5p,hsa-miR-183-5p,hsa-miR-212-3p,hsa-miR-200b-3p,hsa-miR-130a-3p,hsa-miR-141-3p,hsa-miR-200c-3p,hsa-miR-378a-3p	1.72083e-41	1.18307e-40
Viral carcinogenesis	265	15	hsa-let-7d-5p,hsa-miR-16-5p,hsa-miR-25-3p,hsa-miR-29a-3p,hsa-miR-92a-3p,hsa-miR-93-5p,hsa-miR-107,hsa-miR-10b-5p,hsa-miR-182-5p,hsa-miR-183-5p,hsa-miR-221-3p,hsa-miR-125b-5p,hsa-miR-130a-3p,hsa-miR-375-3p,hsa-miR-577	6.24275e-39	4.12021e-38
Pancreatic cancer	78	15	hsa-let-7d-5p,hsa-miR-16-5p,hsa-miR-20a-5p,hsa-miR-29a-3p,hsa-miR-31-5p,hsa-miR-92a-3p,hsa-miR-93-5p,hsa-miR-107,hsa-miR-10b-5p,hsa-miR-182-5p,hsa-miR-224-5p,hsa-miR-200b-3p,hsa-miR-130a-3p,hsa-miR-200c-3p,hsa-miR-130b-3p	2.25648e-38	1.432e-37
Oocyte meiosis	134	15	hsa-let-7b-5p,hsa-let-7d-5p,hsa-miR-16-5p,hsa-miR-20a-5p,hsa-miR-92a-3p,hsa-miR-93-5p,hsa-miR-107,hsa-miR-183-5p,hsa-miR-212-3p,hsa-miR-200b-3p,hsa-miR-23b-3p,hsa-miR-185-5p,hsa-miR-200c-3p,hsa-miR-378a-3p,hsa-miR-141-5p	9.51876e-38	5.81702e-37
Glioma	79	18	hsa-let-7b-5p,hsa-let-7d-5p,hsa-miR-16-5p,hsa-miR-20a-5p,hsa-miR-25-3p,hsa-miR-29a-3p,hsa-miR-92a-3p,hsa-miR-93-5p,hsa-miR-107,hsa-miR-10b-5p,hsa-miR-183-5p,hsa-miR-221-3p,hsa-miR-224-5p,hsa-miR-130a-3p,hsa-miR-185-5p,hsa-miR-34c-5p,hsa-miR-378a-3p,hsa-miR-27a-5p	1.23495e-37	7.27738e-37
AMPK signaling pathway	130	17	hsa-let-7b-5p,hsa-let-7d-5p,hsa-miR-16-5p,hsa-miR-20a-5p,hsa-miR-29a-3p,hsa-miR-93-5p,hsa-miR-107,hsa-miR-182-5p,hsa-miR-183-5p,hsa-miR-224-5p,hsa-miR-125b-5p,hsa-miR-130a-3p,hsa-miR-141-3p,hsa-miR-185-5p,hsa-miR-130b-3p,hsa-miR-21-3p,hsa-miR-1271-5p	3.99935e-36	2.27549e-35
Hepatitis B	177	14	hsa-let-7b-5p,hsa-let-7d-5p,hsa-miR-16-5p,hsa-miR-20a-5p,hsa-miR-25-3p,hsa-miR-29a-3p,hsa-miR-92a-3p,hsa-miR-93-5p,hsa-miR-107,hsa-miR-10b-5p,hsa-miR-183-5p,hsa-miR-23b-3p,hsa-miR-130a-3p,hsa-miR-130b-3p	1.32654e-35	7.29596e-35
Bladder cancer	43	15	hsa-let-7b-5p,hsa-let-7d-5p,hsa-miR-16-5p,hsa-miR-20a-5p,hsa-miR-25-3p,hsa-miR-92a-3p,hsa-miR-93-5p,hsa-miR-107,hsa-miR-10b-5p,hsa-miR-183-5p,hsa-miR-205-5p,hsa-miR-224-5p,hsa-miR-130a-3p,hsa-miR-34c-5p,hsa-miR-92a-1-5p	1.30355e-34	6.93826e-34
Signaling pathways regulating pluripotency of stem cells	156	13	hsa-miR-16-5p,hsa-miR-29a-3p,hsa-miR-92a-3p,hsa-miR-93-5p,hsa-miR-107,hsa-miR-203a-3p,hsa-miR-224-5p,hsa-miR-125b-5p,hsa-miR-130a-3p,hsa-miR-141-3p,hsa-miR-130b-3p,hsa-miR-345-5p,hsa-miR-452-5p	3.01141e-34	1.5485e-33
Thyroid hormone signaling pathway	137	16	hsa-let-7b-5p,hsa-let-7d-5p,hsa-miR-16-5p,hsa-miR-20a-5p,hsa-miR-25-3p,hsa-miR-29a-3p,hsa-miR-31-5p,hsa-miR-92a-3p,hsa-miR-93-5p,hsa-miR-107,hsa-miR-182-5p,hsa-miR-200b-3p,hsa-miR-23b-3p,hsa-miR-130a-3p,hsa-miR-361-5p,hsa-miR-221-5p	3.097e-34	1.5485e-33
Endocrine resistance	118	16	hsa-let-7d-5p,hsa-miR-16-5p,hsa-miR-20a-5p,hsa-miR-29a-3p,hsa-miR-92a-3p,hsa-miR-93-5p,hsa-miR-107,hsa-miR-10b-5p,hsa-miR-182-5p,hsa-miR-224-5p,hsa-miR-200b-3p,hsa-miR-23b-3p,hsa-miR-130a-3p,hsa-miR-200c-3p,hsa-miR-378a-3p,hsa-miR-532-3p	5.52872e-34	2.68306e-33
TGF-beta signaling pathway	103	10	hsa-let-7b-5p,hsa-let-7d-5p,hsa-miR-16-5p,hsa-miR-20a-5p,hsa-miR-92a-3p,hsa-miR-93-5p,hsa-miR-203a-3p,hsa-miR-212-3p,hsa-miR-130a-3p,hsa-miR-130b-3p	2.68038e-32	1.26361e-31
Melanoma	76	16	hsa-let-7d-5p,hsa-miR-16-5p,hsa-miR-20a-5p,hsa-miR-25-3p,hsa-miR-29a-3p,hsa-miR-92a-3p,hsa-miR-93-5p,hsa-miR-107,hsa-miR-10b-5p,hsa-miR-183-5p,hsa-miR-221-3p,hsa-miR-224-5p,hsa-miR-130a-3p,hsa-miR-34c-5p,hsa-miR-378a-3p,hsa-miR-532-3p	4.26693e-32	1.95567e-31
MicroRNAs in cancer	334	11	hsa-miR-29a-3p,hsa-miR-10b-5p,hsa-miR-182-5p,hsa-miR-205-5p,hsa-miR-212-3p,hsa-miR-221-3p,hsa-miR-224-5p,hsa-miR-200b-3p,hsa-miR-130a-3p,hsa-miR-141-3p,hsa-miR-200c-3p	5.307e-32	2.36663e-31
MAPK signaling pathway	329	15	hsa-let-7b-5p,hsa-let-7d-5p,hsa-miR-16-5p,hsa-miR-20a-5p,hsa-miR-31-5p,hsa-miR-92a-3p,hsa-miR-93-5p,hsa-miR-107,hsa-miR-183-5p,hsa-miR-221-3p,hsa-miR-200b-3p,hsa-miR-125b-5p,hsa-miR-141-3p,hsa-miR-200c-3p,hsa-miR-21-3p	1.20672e-30	5.23972e-30
Non-small cell lung cancer	81	16	hsa-miR-16-5p,hsa-miR-20a-5p,hsa-miR-25-3p,hsa-miR-29a-3p,hsa-miR-92a-3p,hsa-miR-93-5p,hsa-miR-107,hsa-miR-10b-5p,hsa-miR-183-5p,hsa-miR-221-3p,hsa-miR-23b-3p,hsa-miR-125b-5p,hsa-miR-130a-3p,hsa-miR-130b-3p,hsa-miR-378a-3p,hsa-miR-502-3p	4.40692e-30	1.86447e-29
Human papillomavirus infection	406	13	hsa-let-7b-5p,hsa-miR-16-5p,hsa-miR-25-3p,hsa-miR-29a-3p,hsa-miR-93-5p,hsa-miR-183-5p,hsa-miR-221-3p,hsa-miR-224-5p,hsa-miR-23b-3p,hsa-miR-130a-3p,hsa-miR-34c-5p,hsa-miR-130b-3p,hsa-miR-452-5p	4.64176e-30	1.91473e-29
EGFR tyrosine kinase inhibitor resistance	82	15	hsa-miR-16-5p,hsa-miR-20a-5p,hsa-miR-29a-3p,hsa-miR-93-5p,hsa-miR-182-5p,hsa-miR-183-5p,hsa-miR-205-5p,hsa-miR-221-3p,hsa-miR-224-5p,hsa-miR-200b-3p,hsa-miR-130a-3p,hsa-miR-375-3p,hsa-miR-378a-3p,hsa-miR-27a-5p,hsa-miR-502-3p	1.03589e-29	4.16883e-29
ErbB signaling pathway	86	16	hsa-let-7b-5p,hsa-miR-20a-5p,hsa-miR-29a-3p,hsa-miR-92a-3p,hsa-miR-93-5p,hsa-miR-107,hsa-miR-182-5p,hsa-miR-183-5p,hsa-miR-212-3p,hsa-miR-221-3p,hsa-miR-200b-3p,hsa-miR-23b-3p,hsa-miR-125b-5p,hsa-miR-130a-3p,hsa-miR-200c-3p,hsa-miR-378a-3p	1.64428e-29	6.45966e-29
Breast cancer	163	15	hsa-let-7d-5p,hsa-miR-16-5p,hsa-miR-20a-5p,hsa-miR-29a-3p,hsa-miR-92a-3p,hsa-miR-93-5p,hsa-miR-107,hsa-miR-10b-5p,hsa-miR-183-5p,hsa-miR-212-3p,hsa-miR-224-5p,hsa-miR-200b-3p,hsa-miR-130a-3p,hsa-miR-200c-3p,hsa-miR-532-3p	1.80541e-28	6.92773e-28
Pathogenic Escherichia coli infection	222	14	hsa-let-7d-5p,hsa-miR-16-5p,hsa-miR-25-3p,hsa-miR-29a-3p,hsa-miR-31-5p,hsa-miR-92a-3p,hsa-miR-107,hsa-miR-183-5p,hsa-miR-221-3p,hsa-miR-23b-3p,hsa-miR-125b-5p,hsa-miR-130a-3p,hsa-miR-378a-3p,hsa-miR-221-5p	9.55936e-28	3.58476e-27
Fluid shear stress and atherosclerosis	149	11	hsa-let-7b-5p,hsa-miR-16-5p,hsa-miR-29a-3p,hsa-miR-31-5p,hsa-miR-93-5p,hsa-miR-107,hsa-miR-224-5p,hsa-miR-130a-3p,hsa-miR-130b-3p,hsa-miR-21-3p,hsa-miR-27a-5p	2.38153e-27	8.73227e-27
Transcriptional misregulation in cancer	206	13	hsa-let-7b-5p,hsa-let-7d-5p,hsa-miR-29a-3p,hsa-miR-92a-3p,hsa-miR-93-5p,hsa-miR-182-5p,hsa-miR-203a-3p,hsa-miR-200b-3p,hsa-miR-130a-3p,hsa-miR-200c-3p,hsa-miR-452-5p,hsa-miR-181d-5p,hsa-miR-1270	4.7438e-27	1.70158e-26
Spinocerebellar ataxia	145	14	hsa-let-7b-5p,hsa-miR-16-5p,hsa-miR-20a-5p,hsa-miR-25-3p,hsa-miR-29a-3p,hsa-miR-31-5p,hsa-miR-92a-3p,hsa-miR-93-5p,hsa-miR-107,hsa-miR-182-5p,hsa-miR-212-3p,hsa-miR-23b-3p,hsa-miR-130a-3p,hsa-miR-452-5p	1.53469e-26	5.38774e-26
Endometrial cancer	61	12	hsa-miR-16-5p,hsa-miR-20a-5p,hsa-miR-25-3p,hsa-miR-29a-3p,hsa-miR-92a-3p,hsa-miR-93-5p,hsa-miR-107,hsa-miR-10b-5p,hsa-miR-183-5p,hsa-miR-125b-5p,hsa-miR-130a-3p,hsa-miR-378a-3p	3.47469e-26	1.19442e-25
Endocytosis	311	14	hsa-let-7b-5p,hsa-let-7d-5p,hsa-miR-16-5p,hsa-miR-20a-5p,hsa-miR-29a-3p,hsa-miR-92a-3p,hsa-miR-93-5p,hsa-miR-107,hsa-miR-224-5p,hsa-miR-200b-3p,hsa-miR-23b-3p,hsa-miR-130a-3p,hsa-miR-130b-3p,hsa-miR-375-3p	1.17519e-25	3.95727e-25
Hepatitis C	173	11	hsa-let-7b-5p,hsa-miR-16-5p,hsa-miR-20a-5p,hsa-miR-29a-3p,hsa-miR-93-5p,hsa-miR-107,hsa-miR-212-3p,hsa-miR-221-3p,hsa-miR-130a-3p,hsa-miR-34c-5p,hsa-miR-130b-3p	4.99336e-25	1.64781e-24
AGE-RAGE signaling pathway in diabetic complications	115	12	hsa-let-7b-5p,hsa-let-7d-5p,hsa-miR-16-5p,hsa-miR-20a-5p,hsa-miR-29a-3p,hsa-miR-31-5p,hsa-miR-93-5p,hsa-miR-107,hsa-miR-182-5p,hsa-miR-183-5p,hsa-miR-224-5p,hsa-miR-452-5p	1.30539e-24	4.22331e-24
Longevity regulating pathway	105	11	hsa-let-7b-5p,hsa-let-7d-5p,hsa-miR-16-5p,hsa-miR-20a-5p,hsa-miR-29a-3p,hsa-miR-93-5p,hsa-miR-107,hsa-miR-182-5p,hsa-miR-183-5p,hsa-miR-221-3p,hsa-miR-130a-3p	3.70807e-24	1.1766e-23
Wnt signaling pathway	173	12	hsa-let-7b-5p,hsa-miR-16-5p,hsa-miR-20a-5p,hsa-miR-31-5p,hsa-miR-92a-3p,hsa-miR-93-5p,hsa-miR-182-5p,hsa-miR-183-5p,hsa-miR-221-3p,hsa-miR-200b-3p,hsa-miR-200c-3p,hsa-miR-1260b	4.12584e-23	1.28446e-22
HIF-1 signaling pathway	112	10	hsa-let-7b-5p,hsa-miR-20a-5p,hsa-miR-107,hsa-miR-182-5p,hsa-miR-125b-5p,hsa-miR-130a-3p,hsa-miR-141-3p,hsa-miR-130b-3p,hsa-miR-378a-3p,hsa-miR-27a-5p	5.44082e-23	1.66247e-22
Apoptosis - multiple species	32	12	hsa-let-7b-5p,hsa-let-7d-5p,hsa-miR-16-5p,hsa-miR-20a-5p,hsa-miR-29a-3p,hsa-miR-181b-5p,hsa-miR-221-3p,hsa-miR-200b-3p,hsa-miR-200c-3p,hsa-miR-452-5p,hsa-miR-181d-5p,hsa-miR-577	6.1022e-23	1.83066e-22
Tight junction	182	10	hsa-let-7b-5p,hsa-let-7d-5p,hsa-miR-16-5p,hsa-miR-31-5p,hsa-miR-93-5p,hsa-miR-183-5p,hsa-miR-200b-3p,hsa-miR-141-3p,hsa-miR-200c-3p,hsa-miR-221-5p	1.18558e-22	3.49323e-22
Kaposi sarcoma-associated herpesvirus infection	245	9	hsa-miR-16-5p,hsa-miR-20a-5p,hsa-miR-29a-3p,hsa-miR-31-5p,hsa-miR-93-5p,hsa-miR-107,hsa-miR-183-5p,hsa-miR-130a-3p,hsa-miR-29b-1-5p	1.87639e-22	5.43165e-22
Platinum drug resistance	75	10	hsa-let-7b-5p,hsa-let-7d-5p,hsa-miR-20a-5p,hsa-miR-29a-3p,hsa-miR-93-5p,hsa-miR-10b-5p,hsa-miR-212-3p,hsa-miR-345-5p,hsa-miR-452-5p,hsa-miR-577	2.13477e-22	6.07307e-22
Lysine degradation	69	10	hsa-miR-16-5p,hsa-miR-29a-3p,hsa-miR-92a-3p,hsa-miR-107,hsa-miR-224-5p,hsa-miR-23b-3p,hsa-miR-200c-3p,hsa-miR-577,hsa-miR-532-3p,hsa-miR-1260a	3.27932e-22	9.17099e-22
Yersinia infection	147	12	hsa-let-7b-5p,hsa-miR-16-5p,hsa-miR-92a-3p,hsa-miR-93-5p,hsa-miR-107,hsa-miR-183-5p,hsa-miR-203a-3p,hsa-miR-200b-3p,hsa-miR-125b-5p,hsa-miR-130a-3p,hsa-miR-200c-3p,hsa-miR-378a-3p	7.32623e-22	2.01471e-21
Axon guidance	186	11	hsa-miR-16-5p,hsa-miR-20a-5p,hsa-miR-31-5p,hsa-miR-93-5p,hsa-miR-107,hsa-miR-183-5p,hsa-miR-200b-3p,hsa-miR-125b-5p,hsa-miR-130a-3p,hsa-miR-130b-3p,hsa-miR-378a-3p	8.99832e-22	2.43397e-21
mTOR signaling pathway	177	10	hsa-let-7b-5p,hsa-let-7d-5p,hsa-miR-16-5p,hsa-miR-20a-5p,hsa-miR-29a-3p,hsa-miR-93-5p,hsa-miR-107,hsa-miR-183-5p,hsa-miR-130a-3p,hsa-miR-378a-3p	1.7302e-21	4.60456e-21
Rap1 signaling pathway	214	10	hsa-let-7b-5p,hsa-miR-16-5p,hsa-miR-29a-3p,hsa-miR-93-5p,hsa-miR-107,hsa-miR-183-5p,hsa-miR-221-3p,hsa-miR-224-5p,hsa-miR-23b-3p,hsa-miR-141-3p	1.79525e-20	4.70186e-20
Amyotrophic lateral sclerosis	408	10	hsa-let-7b-5p,hsa-let-7d-5p,hsa-miR-16-5p,hsa-miR-20a-5p,hsa-miR-93-5p,hsa-miR-100-5p,hsa-miR-107,hsa-miR-221-3p,hsa-miR-130a-3p,hsa-miR-378a-3p	3.75717e-20	9.68646e-20
Apoptosis	151	10	hsa-miR-16-5p,hsa-miR-29a-3p,hsa-miR-93-5p,hsa-miR-107,hsa-miR-10b-5p,hsa-miR-200b-3p,hsa-miR-130a-3p,hsa-miR-200c-3p,hsa-miR-452-5p,hsa-miR-577	3.94656e-20	1.00182e-19
Gastric cancer	162	11	hsa-miR-16-5p,hsa-miR-20a-5p,hsa-miR-29a-3p,hsa-miR-92a-3p,hsa-miR-93-5p,hsa-miR-107,hsa-miR-182-5p,hsa-miR-200b-3p,hsa-miR-130a-3p,hsa-miR-200c-3p,hsa-miR-532-3p	9.16975e-20	2.29244e-19
Insulin signaling pathway	153	9	hsa-miR-16-5p,hsa-miR-20a-5p,hsa-miR-93-5p,hsa-miR-107,hsa-miR-182-5p,hsa-miR-183-5p,hsa-miR-224-5p,hsa-miR-130a-3p,hsa-miR-484	6.00522e-19	1.4789e-18
RNA transport	199	8	hsa-let-7b-5p,hsa-miR-16-5p,hsa-miR-20a-5p,hsa-miR-93-5p,hsa-miR-182-5p,hsa-miR-125b-5p,hsa-miR-149-5p,hsa-miR-200c-3p	1.13802e-18	2.76138e-18
Alzheimer disease	426	8	hsa-let-7b-5p,hsa-miR-16-5p,hsa-miR-29a-3p,hsa-miR-31-5p,hsa-miR-107,hsa-miR-130a-3p,hsa-miR-130b-3p,hsa-miR-378a-3p	1.51542e-18	3.62383e-18
mRNA surveillance pathway	108	8	hsa-let-7b-5p,hsa-miR-20a-5p,hsa-miR-93-5p,hsa-miR-221-3p,hsa-miR-23b-3p,hsa-miR-125b-5p,hsa-miR-378a-3p,hsa-miR-221-5p	3.02979e-18	7.14164e-18
Pathways of neurodegeneration - multiple diseases	539	7	hsa-let-7b-5p,hsa-miR-20a-5p,hsa-miR-29a-3p,hsa-miR-31-5p,hsa-miR-107,hsa-miR-221-3p,hsa-miR-130a-3p	5.67366e-18	1.31853e-17
Sphingolipid signaling pathway	133	9	hsa-miR-16-5p,hsa-miR-20a-5p,hsa-miR-31-5p,hsa-miR-93-5p,hsa-miR-107,hsa-miR-183-5p,hsa-miR-200b-3p,hsa-miR-200c-3p,hsa-miR-378a-3p	1.2714e-17	2.91363e-17
Mitophagy - animal	76	7	hsa-miR-20a-5p,hsa-miR-29a-3p,hsa-miR-93-5p,hsa-miR-107,hsa-miR-10b-5p,hsa-miR-221-3p,hsa-miR-200c-3p	1.32798e-17	3.0016e-17
Herpes simplex virus 1 infection	673	3	hsa-miR-181b-5p,hsa-miR-23b-3p,hsa-miR-181d-5p	1.53056e-17	3.41274e-17
Cushing syndrome	176	11	hsa-let-7b-5p,hsa-miR-16-5p,hsa-miR-25-3p,hsa-miR-31-5p,hsa-miR-93-5p,hsa-miR-107,hsa-miR-224-5p,hsa-miR-200b-3p,hsa-miR-23b-3p,hsa-miR-130a-3p,hsa-miR-200c-3p	4.4784e-17	9.85249e-17
Prolactin signaling pathway	73	7	hsa-miR-16-5p,hsa-miR-20a-5p,hsa-miR-29a-3p,hsa-miR-93-5p,hsa-miR-182-5p,hsa-miR-221-3p,hsa-miR-130a-3p	2.85179e-16	6.19139e-16
Huntington disease	339	7	hsa-let-7b-5p,hsa-miR-16-5p,hsa-miR-20a-5p,hsa-miR-29a-3p,hsa-miR-130a-3p,hsa-miR-130b-3p,hsa-miR-378a-3p	6.58429e-16	1.41092e-15
Measles	161	9	hsa-miR-16-5p,hsa-miR-20a-5p,hsa-miR-29a-3p,hsa-miR-93-5p,hsa-miR-107,hsa-miR-182-5p,hsa-miR-130a-3p,hsa-miR-378a-3p,hsa-miR-577	1.00427e-15	2.12442e-15
Growth hormone synthesis, secretion and action	129	7	hsa-miR-16-5p,hsa-miR-25-3p,hsa-miR-29a-3p,hsa-miR-92a-3p,hsa-miR-182-5p,hsa-miR-183-5p,hsa-miR-221-3p	4.2484e-15	8.87324e-15
Central carbon metabolism in cancer	74	8	hsa-miR-16-5p,hsa-miR-125b-5p,hsa-miR-130a-3p,hsa-miR-141-3p,hsa-miR-34c-5p,hsa-miR-378a-3p,hsa-miR-92a-1-5p,hsa-miR-532-3p	5.58292e-15	1.15148e-14
Circadian rhythm	31	6	hsa-let-7b-5p,hsa-miR-16-5p,hsa-miR-20a-5p,hsa-miR-93-5p,hsa-miR-10b-5p,hsa-miR-182-5p	7.23006e-15	1.47279e-14
Ras signaling pathway	241	5	hsa-miR-16-5p,hsa-miR-200b-3p,hsa-miR-141-3p,hsa-miR-200c-3p,hsa-miR-27a-5p	8.31034e-15	1.6722e-14
Hedgehog signaling pathway	59	8	hsa-miR-20a-5p,hsa-miR-29a-3p,hsa-miR-93-5p,hsa-miR-200b-3p,hsa-miR-23b-3p,hsa-miR-185-5p,hsa-miR-200c-3p,hsa-miR-532-3p	1.0313e-14	2.05018e-14
Human cytomegalovirus infection	306	8	hsa-let-7b-5p,hsa-miR-16-5p,hsa-miR-25-3p,hsa-miR-31-5p,hsa-miR-10b-5p,hsa-miR-183-5p,hsa-miR-130a-3p,hsa-miR-378a-3p	1.34787e-14	2.64759e-14
Alcoholism	195	6	hsa-miR-16-5p,hsa-miR-29a-3p,hsa-miR-107,hsa-miR-10b-5p,hsa-miR-183-5p,hsa-miR-652-3p	1.39239e-14	2.70288e-14
Insulin resistance	124	6	hsa-miR-20a-5p,hsa-miR-93-5p,hsa-miR-181b-5p,hsa-miR-182-5p,hsa-miR-130a-3p,hsa-miR-484	8.82959e-14	1.69405e-13
Oxytocin signaling pathway	161	6	hsa-let-7b-5p,hsa-miR-107,hsa-miR-10b-5p,hsa-miR-361-5p,hsa-miR-378a-3p,hsa-miR-484	6.2272e-13	1.18102e-12
Fc gamma R-mediated phagocytosis	101	7	hsa-let-7d-5p,hsa-miR-16-5p,hsa-miR-182-5p,hsa-miR-183-5p,hsa-miR-200b-3p,hsa-miR-200c-3p,hsa-miR-221-5p	1.04769e-12	1.96442e-12
Acute myeloid leukemia	69	6	hsa-let-7d-5p,hsa-miR-16-5p,hsa-miR-20a-5p,hsa-miR-93-5p,hsa-miR-182-5p,hsa-miR-130a-3p	5.63832e-12	1.04531e-11
Thermogenesis	252	4	hsa-let-7b-5p,hsa-miR-93-5p,hsa-miR-130a-3p,hsa-miR-130b-3p	1.31928e-11	2.41867e-11
Phosphatidylinositol signaling system	101	5	hsa-miR-16-5p,hsa-miR-107,hsa-miR-23b-3p,hsa-miR-130a-3p,hsa-miR-130b-3p	1.76463e-11	3.1996e-11
Thyroid cancer	43	5	hsa-miR-20a-5p,hsa-miR-92a-3p,hsa-miR-93-5p,hsa-miR-183-5p,hsa-miR-130a-3p	2.27996e-11	4.08905e-11
Progesterone-mediated oocyte maturation	104	6	hsa-miR-16-5p,hsa-miR-29a-3p,hsa-miR-92a-3p,hsa-miR-93-5p,hsa-miR-107,hsa-miR-182-5p	2.65661e-11	4.71333e-11
Long-term potentiation	71	6	hsa-let-7b-5p,hsa-miR-20a-5p,hsa-miR-31-5p,hsa-miR-92a-3p,hsa-miR-107,hsa-miR-23b-3p	1.62371e-10	2.85013e-10
Dopaminergic synapse	143	6	hsa-let-7b-5p,hsa-miR-16-5p,hsa-miR-29a-3p,hsa-miR-31-5p,hsa-miR-183-5p,hsa-miR-221-3p	4.17702e-10	7.25482e-10
Epithelial cell signaling in Helicobacter pylori infection	79	4	hsa-miR-16-5p,hsa-miR-31-5p,hsa-miR-23b-3p,hsa-miR-21-3p	4.72502e-10	8.12114e-10
Apelin signaling pathway	140	6	hsa-let-7b-5p,hsa-let-7d-5p,hsa-miR-16-5p,hsa-miR-29a-3p,hsa-miR-107,hsa-miR-183-5p	5.2861e-10	8.99183e-10
TNF signaling pathway	131	5	hsa-miR-16-5p,hsa-miR-29a-3p,hsa-miR-31-5p,hsa-miR-93-5p,hsa-miR-130a-3p	1.2973e-09	2.18422e-09
Relaxin signaling pathway	138	3	hsa-let-7b-5p,hsa-let-7d-5p,hsa-miR-29a-3p	1.73991e-09	2.89985e-09
C-type lectin receptor signaling pathway	116	4	hsa-miR-16-5p,hsa-miR-31-5p,hsa-miR-10b-5p,hsa-miR-27a-5p	3.69115e-09	6.09039e-09
Vasopressin-regulated water reabsorption	47	4	hsa-miR-16-5p,hsa-miR-107,hsa-miR-92a-1-5p,hsa-miR-221-5p	8.0056e-09	1.30785e-08
Vibrio cholerae infection	60	4	hsa-let-7d-5p,hsa-miR-16-5p,hsa-miR-23b-3p,hsa-miR-21-3p	1.13966e-08	1.84357e-08
cGMP-PKG signaling pathway	175	4	hsa-miR-16-5p,hsa-miR-31-5p,hsa-miR-107,hsa-miR-182-5p	1.45233e-08	2.32655e-08
Long-term depression	64	4	hsa-let-7b-5p,hsa-miR-16-5p,hsa-miR-92a-3p,hsa-miR-183-5p	1.65308e-08	2.62268e-08
RNA degradation	101	4	hsa-miR-20a-5p,hsa-miR-93-5p,hsa-miR-130a-3p,hsa-miR-378a-3p	5.98614e-08	9.4068e-08
Choline metabolism in cancer	106	4	hsa-miR-29a-3p,hsa-miR-93-5p,hsa-miR-182-5p,hsa-miR-130a-3p	9.55174e-08	1.48683e-07
Parkinson disease	282	3	hsa-let-7b-5p,hsa-miR-29a-3p,hsa-miR-130a-3p	3.94452e-07	6.02635e-07
Human immunodeficiency virus 1 infection	277	4	hsa-miR-16-5p,hsa-miR-31-5p,hsa-miR-107,hsa-miR-378a-3p	3.94312e-07	6.02635e-07
Parathyroid hormone synthesis, secretion and action	118	4	hsa-let-7b-5p,hsa-miR-16-5p,hsa-miR-29a-3p,hsa-miR-183-5p	5.39227e-07	8.1626e-07
Endocrine and other factor-regulated calcium reabsorption	57	4	hsa-let-7b-5p,hsa-let-7d-5p,hsa-miR-16-5p,hsa-miR-29a-3p	6.72026e-07	1.00804e-06
Glucagon signaling pathway	114	3	hsa-let-7b-5p,hsa-miR-31-5p,hsa-miR-182-5p	8.14593e-07	1.21088e-06
Platelet activation	136	3	hsa-miR-107,hsa-miR-23b-3p,hsa-miR-378a-3p	1.02548e-06	1.51076e-06
Autophagy - other	33	2	hsa-miR-130a-3p,hsa-miR-130b-3p	1.32331e-06	1.91531e-06
Non-alcoholic fatty liver disease	177	3	hsa-miR-29a-3p,hsa-miR-182-5p,hsa-miR-130a-3p	1.31708e-06	1.91531e-06
Human T-cell leukemia virus 1 infection	352	3	hsa-miR-25-3p,hsa-miR-31-5p,hsa-miR-130a-3p	2.54313e-06	3.64883e-06
Aldosterone synthesis and secretion	110	3	hsa-let-7b-5p,hsa-miR-31-5p,hsa-miR-185-5p	3.39475e-06	4.82873e-06
Chagas disease	116	3	hsa-miR-16-5p,hsa-miR-29a-3p,hsa-miR-107	3.67788e-06	5.18676e-06
Spliceosome	193	2	hsa-miR-21-3p,hsa-miR-1260b	3.85197e-06	5.38623e-06
N-Glycan biosynthesis	51	3	hsa-let-7d-5p,hsa-miR-16-5p,hsa-miR-29a-3p	8.89402e-06	1.2332e-05
Hippo signaling pathway - multiple species	30	2	hsa-miR-182-5p,hsa-miR-183-5p	1.07071e-05	1.47222e-05
Cysteine and methionine metabolism	53	2	hsa-miR-107,hsa-miR-21-3p	1.17882e-05	1.60749e-05
Inflammatory mediator regulation of TRP channels	101	1	hsa-miR-31-5p	1.80343e-05	2.43907e-05
Longevity regulating pathway - multiple species	79	1	hsa-miR-182-5p	2.034e-05	2.72853e-05
Protein digestion and absorption	114	1	hsa-miR-29a-3p	2.09715e-05	2.79056e-05
Lysosome	145	2	hsa-miR-16-5p,hsa-miR-107	2.38964e-05	3.15432e-05
Ferroptosis	41	2	hsa-miR-92a-3p,hsa-miR-125b-5p	2.54472e-05	3.33237e-05
T cell receptor signaling pathway	115	3	hsa-miR-93-5p,hsa-miR-130a-3p,hsa-miR-378a-3p	4.59813e-05	5.97394e-05
Adrenergic signaling in cardiomyocytes	161	2	hsa-let-7b-5p,hsa-miR-16-5p	6.3119e-05	8.13643e-05
Gastric acid secretion	80	2	hsa-let-7b-5p,hsa-miR-31-5p	8.17107e-05	0.000104514
Various types of N-glycan biosynthesis	40	2	hsa-miR-16-5p,hsa-miR-29a-3p	0.000117657	0.000149334
Inositol phosphate metabolism	78	1	hsa-miR-107	0.0001216	0.00015316
GnRH signaling pathway	97	2	hsa-miR-16-5p,hsa-miR-23b-3p	0.000137192	0.00017149
Renin secretion	72	2	hsa-miR-16-5p,hsa-miR-31-5p	0.000160559	0.000199189
Basal cell carcinoma	66	1	hsa-miR-125b-5p	0.000170774	0.000210282
Carbon metabolism	122	1	hsa-miR-107	0.000208543	0.000254886
PD-L1 expression and PD-1 checkpoint pathway in cancer	101	1	hsa-miR-130a-3p	0.000307087	0.000372568
Notch signaling pathway	63	1	hsa-miR-16-5p	0.000314598	0.000378895
Aminoacyl-tRNA biosynthesis	57	1	hsa-miR-1260b	0.000331561	0.000396432
Oxidative phosphorylation	157	1	hsa-miR-130a-3p	0.000381326	0.000452653
Neutrophil extracellular trap formation	205	2	hsa-miR-29a-3p,hsa-miR-107	0.000415445	0.000489632
Melanogenesis	107	2	hsa-let-7b-5p,hsa-miR-16-5p	0.00043288	0.000506562
ECM-receptor interaction	104	1	hsa-miR-29a-3p	0.000477892	0.000555297
Gap junction	99	1	hsa-miR-23b-3p	0.000793256	0.000915295
Amoebiasis	113	1	hsa-miR-29a-3p	0.00130899	0.00149988
Fatty acid degradation	43	1	hsa-miR-107	0.00243548	0.00277141
NOD-like receptor signaling pathway	221	1	hsa-miR-16-5p	0.00282366	0.00319112
Cholinergic synapse	122	1	hsa-miR-29a-3p	0.00313827	0.00352255
Valine, leucine and isoleucine degradation	50	1	hsa-miR-107	0.00324808	0.00362117
Adipocytokine signaling pathway	88	1	hsa-miR-31-5p	0.00392029	0.00434126
Leukocyte transendothelial migration	120	1	hsa-miR-221-3p	0.00399119	0.0043903
IL-17 signaling pathway	106	1	hsa-miR-23b-3p	0.00438249	0.00478881
Fatty acid metabolism	70	1	hsa-miR-107	0.00473511	0.00514009
Propanoate metabolism	36	1	hsa-miR-378a-3p	0.00510669	0.00550722
DNA replication	38	1	hsa-miR-20a-5p	0.00535172	0.00573398
Pyrimidine metabolism	57	1	hsa-miR-16-5p	0.00563477	0.00595889
cAMP signaling pathway	226	1	hsa-miR-31-5p	0.00566998	0.00595889
Regulation of lipolysis in adipocytes	61	1	hsa-miR-182-5p	0.00562197	0.00595889
Citrate cycle (TCA cycle)	31	1	hsa-miR-107	0.00625243	0.00652944
Terpenoid backbone biosynthesis	22	1	hsa-miR-23b-3p	0.00638892	0.00663001
Other types of O-glycan biosynthesis	49	1	hsa-miR-16-5p	0.00896573	0.00924591
Mannose type O-glycan biosynthesis	24	1	hsa-miR-16-5p	0.00915622	0.00938371
VEGF signaling pathway	61	1	hsa-miR-16-5p	0.0108869	0.0110885
RNA polymerase	40	1	hsa-miR-16-5p	0.0118691	0.0120147
Antifolate resistance	41	1	hsa-miR-16-5p	0.014346	0.0144334
Glycosaminoglycan biosynthesis - chondroitin sulfate / dermatan sulfate	21	1	hsa-miR-16-5p	0.0145354	0.0145354

## Sheet: Table 4 Upregulated miRNA
Supplementary table 4 List of upregulated miRNAs from CSC vs adherent cells identified in each study.
Lung cancer NCI H1975: Illumina	Ovarian cancer Kuramochi cell l: Microarray	Ovarian cancer SKOV-3: Microarray	Breast Cancer MCF-7: Microarray	Breast cancer (2) MCF7:Illumina	Colorectal cancer HCT116: illumina			Line cell	GEO ID	Log2Fold Change of hsa-miR 1246
hsa-miR-5684	hsa-miR-328-3p	hsa-miR-328-3p	hsa-miR-654-5p	hsa-miR-4492	hsa-miR-122-5p			Ovarian cancer Kuramochi cell l	GSE107155	2.47
hsa-miR-9901	hsa-miR-630	hsa-miR-4284	hsa-miR-3197	hsa-miR-1290	hsa-miR-4492			Ovarian cancer SKOV-3	GSE107155	4.015
hsa-miR-3648	hsa-miR-575	hsa-miR-630	hsa-miR-148a-3p	hsa-miR-127-3p	hsa-miR-338-5p			Breast Cancer MCF-7	GSE68031	1.107
hsa-miR-3648.1	hsa-miR-4284	hsa-miR-1246	hsa-miR-148b-3p	hsa-miR-1246	hsa-miR-4488			Breast cancer Illumina (2) MCF7	GSE68246	6.084
hsa-miR-1973	hsa-miR-1915-3p	hsa-miR-146b-5p	hsa-miR-9-3p	hsa-miR-6089	hsa-miR-155-5p			Colorectal cancer illumina HCT116	GSE125904	3.725
hsa-miR-4492	hsa-miR-4488	hsa-miR-3195	hsa-miR-21-5p	hsa-miR-6089,1	hsa-miR-6784-3p			Lung cancer NCI H1975	Our results	3.809
hsa-miR-4516	hsa-miR-1268a	hsa-miR-4516	hsa-miR-301a-3p	hsa-miR-411-5p	hsa-miR-6735-5p
hsa-miR-10400-5p	hsa-miR-1973	hsa-miR-4485-3p	hsa-miR-139-5p	hsa-miR-10400-5p	hsa-miR-125b-2-3p
hsa-miR-1908-3p	hsa-miR-320e	hsa-miR-575	hsa-miR-126-3p	hsa-miR-1248	hsa-miR-4682
hsa-miR-1290	hsa-miR-4516	hsa-miR-1915-3p	hsa-miR-6132	hsa-miR-410-3p	hsa-miR-3960
hsa-miR-6721-5p	hsa-miR-204-5p	hsa-miR-222-3p	hsa-miR-4492	hsa-miR-143-3p	hsa-miR-9898
hsa-miR-6763-5p	hsa-miR-576-3p	hsa-miR-320e	hsa-miR-1587	hsa-miR-381-3p	hsa-miR-363-3p
hsa-miR-1246	hsa-miR-146b-5p	hsa-miR-4488	hsa-miR-4505	hsa-miR-4508	hsa-miR-6803-3p
hsa-miR-122-5p	hsa-miR-4532	hsa-miR-26b-5p	hsa-let-7g-5p	hsa-miR-409-3p	hsa-miR-3605-3p
hsa-miR-4709-5p	hsa-miR-888-5p	hsa-miR-483-3p	hsa-miR-6779-5p	hsa-miR-126-5p	hsa-miR-4485-3p
hsa-miR-574-5p	hsa-miR-890	hsa-miR-1268a	hsa-miR-6879-5p	hsa-miR-1291	hsa-miR-12136
hsa-miR-1908-5p	hsa-miR-1246	hsa-miR-1973	hsa-miR-4484	hsa-miR-4485-3p	hsa-miR-3173-5p
hsa-miR-188-5p	hsa-miR-135b-5p	hsa-miR-1290	hsa-miR-3135b	hsa-miR-10394-5p	hsa-miR-423-5p
hsa-miR-671-5p	hsa-miR-663a	hsa-miR-31-5p	hsa-miR-29b-3p	hsa-miR-211-5p	hsa-miR-3648
hsa-miR-4488	hsa-miR-210-3p	hsa-miR-361-3p	hsa-miR-92b-5p	hsa-miR-136-3p	hsa-miR-3648,1
hsa-miR-6726-3p	hsa-miR-203a-3p	hsa-miR-601	hsa-miR-8075	hsa-miR-378e	hsa-miR-10395-3p
hsa-miR-7704	hsa-miR-505-3p	hsa-miR-542-5p	hsa-miR-181a-3p	hsa-miR-654-3p	hsa-miR-338-3p
hsa-miR-4449	hsa-miR-132-3p	hsa-miR-34a-5p	hsa-miR-7641	hsa-miR-12136	hsa-miR-1246
hsa-miR-199a-3p.1	hsa-miR-221-5p	hsa-miR-642a-3p	hsa-let-7f-5p	hsa-miR-493-5p	hsa-miR-485-5p
hsa-miR-199a-3p	hsa-miR-222-3p	hsa-miR-30d-5p	hsa-miR-30b-5p	hsa-miR-199a-3p	hsa-miR-7704
hsa-miR-199b-3p	hsa-miR-218-5p	hsa-miR-186-5p	hsa-miR-885-5p	hsa-miR-199b-3p	hsa-miR-6852-5p
hsa-miR-499a-5p	hsa-miR-425-5p	hsa-miR-30e-5p	hsa-miR-183-5p	hsa-miR-145-5p	hsa-miR-6820-5p
hsa-miR-193a-3p	hsa-miR-3195	hsa-miR-30a-5p	hsa-miR-181c-5p	hsa-miR-199a-3p,1	hsa-miR-6847-5p
hsa-miR-935	hsa-miR-877-5p	hsa-miR-708-5p	hsa-miR-10a-5p	hsa-miR-145-3p	hsa-miR-1908-3p
hsa-miR-6860	hsa-miR-28-5p	hsa-miR-1307-3p	hsa-miR-3620-5p	hsa-miR-199a-5p	hsa-miR-205-5p
hsa-miR-1268b	hsa-miR-373-3p	hsa-miR-489-3p	hsa-miR-31-3p	hsa-miR-199a-5p,1	hsa-miR-3609
hsa-miR-1268a	hsa-miR-200b-3p	hsa-miR-21-5p	hsa-miR-181d-5p	hsa-miR-139-5p	hsa-miR-144-3p
hsa-miR-760	hsa-miR-29c-3p	hsa-miR-219a-2-3p	hsa-miR-30c-5p	hsa-miR-204-5p	hsa-miR-615-5p
hsa-miR-197-5p	hsa-miR-26b-5p	hsa-miR-183-5p	hsa-miR-1908-5p	hsa-miR-126-3p	hsa-miR-451a
hsa-miR-210-3p	hsa-miR-891b	hsa-miR-885-5p	hsa-miR-6813-5p	hsa-miR-301a-3p	hsa-miR-937-3p
hsa-miR-6510-3p	hsa-miR-330-5p	hsa-miR-194-5p	hsa-miR-4508	hsa-miR-7705	hsa-miR-127-3p
hsa-miR-6842-3p	hsa-miR-148a-3p	hsa-miR-195-5p	hsa-miR-1246	hsa-miR-301b-3p	hsa-miR-320b
hsa-miR-1248	hsa-miR-885-5p	hsa-miR-151a-5p	hsa-miR-342-3p	hsa-miR-21-3p	hsa-miR-320b,1
hsa-miR-6511b-3p.1	hsa-miR-28-3p	hsa-miR-342-3p	hsa-miR-122-5p	hsa-miR-34c-5p	hsa-miR-3651
hsa-miR-4508	hsa-miR-30d-5p	hsa-miR-26a-5p	hsa-miR-4750-5p	hsa-miR-1277-5p	hsa-miR-193b-5p
hsa-miR-199b-5p	hsa-miR-510-3p	hsa-miR-1269a	hsa-miR-19a-3p	hsa-miR-545-3p	hsa-miR-25-5p
hsa-miR-7974	hsa-miR-625-5p	hsa-miR-182-5p	hsa-miR-3679-5p	hsa-miR-193a-3p	hsa-miR-2116-3p
hsa-miR-1910-5p	hsa-miR-151a-5p	hsa-miR-181a-5p	hsa-miR-151b	hsa-miR-378d	hsa-miR-219a-1-3p
hsa-miR-365b-5p	hsa-miR-31-5p	hsa-miR-574-3p	hsa-miR-196a-5p	hsa-miR-33a-5p	hsa-miR-365a-5p
hsa-miR-522-3p	hsa-miR-302f	hsa-miR-425-5p	hsa-miR-4530	hsa-miR-215-5p	hsa-miR-6511b-3p,1
hsa-miR-1303	hsa-miR-185-5p	hsa-miR-126-3p	hsa-miR-23c	hsa-miR-33b-5p	hsa-miR-342-5p
hsa-miR-340-3p	hsa-miR-891a-5p		hsa-let-7i-5p	hsa-miR-29b-3p,1	hsa-miR-5701
hsa-miR-486-3p	hsa-miR-542-5p		hsa-miR-152-3p	hsa-miR-378d,1	hsa-miR-5701,1
hsa-miR-1843	hsa-miR-22-3p		hsa-miR-20b-5p	hsa-miR-196a-3p	hsa-miR-5701,2
hsa-miR-210-5p	hsa-miR-30b-5p		hsa-miR-29a-3p	hsa-miR-29b-3p	hsa-miR-30a-5p
hsa-miR-147b-3p	hsa-miR-574-3p		hsa-miR-30e-3p	hsa-miR-142-5p	hsa-miR-1910-5p
hsa-miR-877-5p	hsa-miR-30e-5p		hsa-miR-30a-5p	hsa-miR-194-5p	hsa-miR-143-3p
hsa-miR-4521	hsa-miR-483-3p		hsa-miR-1184	hsa-miR-210-3p	hsa-miR-486-3p
hsa-miR-3187-3p	hsa-miR-107		hsa-miR-4443	hsa-miR-545-5p	hsa-miR-6511a-3p
hsa-let-7b-3p	hsa-miR-1261		hsa-miR-28-5p	hsa-miR-101-3p	hsa-miR-6511a-3p,1
hsa-miR-574-3p	hsa-miR-374b-5p		hsa-miR-6750-5p	hsa-miR-194-5p,1	hsa-miR-6511a-3p,2
hsa-miR-7-5p	hsa-miR-21-5p		hsa-miR-30d-5p	hsa-miR-101-3p,1	hsa-miR-6511a-3p,3
hsa-miR-92b-5p	hsa-miR-596		hsa-miR-222-3p	hsa-miR-542-3p	hsa-miR-3127-5p
hsa-miR-125a-3p	hsa-miR-664a-3p		hsa-miR-182-5p	hsa-miR-30e-5p	hsa-miR-744-5p
hsa-miR-1343-3p	hsa-miR-26a-5p		hsa-miR-27b-3p	hsa-miR-32-5p	hsa-miR-2110
hsa-miR-6511b-3p	hsa-miR-193a-3p		hsa-miR-181b-5p	hsa-miR-10b-5p	hsa-miR-328-3p
hsa-miR-101-3p.1	hsa-miR-361-5p		hsa-miR-221-3p	hsa-miR-18a-5p	hsa-miR-877-5p
hsa-miR-101-3p	hsa-miR-24-3p		hsa-miR-221-3p	hsa-miR-19a-3p	hsa-miR-320c
hsa-miR-15b-3p	hsa-miR-302c-3p			hsa-miR-30b-5p	hsa-miR-92b-3p
hsa-miR-2277-5p	hsa-miR-361-3p			hsa-miR-361-5p	hsa-miR-92b-5p
hsa-miR-486-5p.1	hsa-miR-642a-5p			hsa-miR-362-5p	hsa-miR-6511a-5p
hsa-miR-455-5p	hsa-miR-195-5p			hsa-miR-146b-5p	hsa-miR-6511a-5p,1
hsa-miR-32-5p	hsa-miR-1298-5p			hsa-miR-328-3p	hsa-miR-6511a-5p,2
hsa-miR-548o-3p	hsa-miR-23a-3p			hsa-miR-374a-5p	hsa-miR-6511a-5p,3
hsa-miR-548o-3p.1	hsa-miR-135a-5p			hsa-miR-21-5p	hsa-miR-483-5p
hsa-miR-146a-5p	hsa-miR-30a-5p			hsa-miR-532-5p	hsa-miR-320c,1
hsa-miR-744-5p	hsa-miR-2117			hsa-miR-374b-5p	hsa-miR-1249-3p
hsa-miR-516a-5p	hsa-miR-126-3p			hsa-miR-183-5p	hsa-miR-760
hsa-miR-516a-5p.1	hsa-miR-6724-5p			hsa-miR-192-5p	hsa-miR-6511b-3p
hsa-miR-1292-5p	hsa-miR-598-3p			hsa-miR-182-5p	hsa-miR-191-3p
hsa-miR-151a-3p	hsa-miR-194-5p			hsa-miR-486-5p,1	hsa-miR-215-5p
hsa-miR-1307-3p	hsa-miR-6721-5p			hsa-miR-455-5p	hsa-miR-483-3p
hsa-miR-21-5p	hsa-miR-892b			hsa-miR-486-5p	hsa-miR-1468-5p
hsa-let-7a-3p	hsa-miR-1290			hsa-miR-181c-5p	hsa-miR-671-3p
hsa-let-7a-3p.1	hsa-miR-151a-3p			hsa-miR-24-2-5p	hsa-miR-197-3p
hsa-miR-342-5p	hsa-miR-140-5p			hsa-miR-132-3p	hsa-miR-375-3p
hsa-miR-7-5p.2	hsa-miR-219a-5p			hsa-miR-378c	hsa-miR-130b-5p
hsa-miR-7-5p.1	hsa-let-7g-5p			hsa-miR-148a-3p	hsa-miR-423-3p
hsa-miR-486-5p	hsa-miR-939-5p			hsa-miR-98-5p	hsa-miR-935
hsa-miR-2110	hsa-miR-191-5p			hsa-miR-424-5p	hsa-miR-222-3p
hsa-miR-4787-3p	hsa-miR-601			hsa-miR-33a-3p	hsa-miR-330-3p
hsa-miR-148a-3p	hsa-miR-16-5p			hsa-miR-340-5p	hsa-miR-3615
hsa-miR-615-3p	hsa-let-7d-5p			hsa-miR-34a-5p	hsa-miR-92a-3p
hsa-miR-4326	hsa-miR-1537-3p			hsa-miR-30a-5p	hsa-miR-92a-3p,1
hsa-miR-3615	hsa-miR-452-5p			hsa-miR-660-5p	hsa-miR-1247-5p
hsa-miR-197-3p	hsa-miR-29b-3p			hsa-miR-19b-3p	hsa-miR-18a-3p
hsa-miR-193b-5p	hsa-miR-25-3p			hsa-miR-29c-3p	hsa-miR-1260a
hsa-miR-423-5p	hsa-miR-375			hsa-miR-106b-5p	hsa-miR-7977
hsa-miR-193a-5p	hsa-miR-642a-3p			hsa-miR-19b-3p,1	hsa-miR-625-3p
hsa-miR-92b-3p	hsa-miR-155-5p			hsa-miR-24-3p,1	hsa-miR-149-5p
hsa-miR-450b-5p	hsa-miR-29a-3p			hsa-miR-96-5p	hsa-miR-224-5p
hsa-miR-328-3p	hsa-miR-130a-3p			hsa-miR-24-3p	hsa-let-7d-3p
hsa-miR-423-3p	hsa-miR-125a-3p			hsa-miR-125b-2-3p	hsa-miR-181b-5p
	hsa-miR-182-5p			hsa-miR-338-3p	hsa-miR-1260b
	hsa-miR-374a-5p			hsa-miR-195-5p	hsa-miR-320a-3p
	hsa-miR-3074-3p			hsa-miR-28-5p	hsa-miR-181b-5p,1
	hsa-miR-574-5p			hsa-miR-345-3p	hsa-miR-200b-5p
	hsa-miR-593-3p			hsa-miR-23b-3p	hsa-miR-486-5p
	hsa-miR-10a-5p			hsa-miR-26a-5p,1	hsa-miR-486-5p,1
	hsa-let-7f-5p			hsa-miR-26a-5p	hsa-miR-361-3p
	hsa-miR-1285-5p			hsa-miR-769-5p	hsa-miR-28-3p
	hsa-let-7a-5p			hsa-miR-20a-5p	hsa-miR-106b-3p
	hsa-miR-221-3p			hsa-miR-342-3p
	hsa-miR-369-3p			hsa-miR-574-5p
	hsa-miR-362-3p			hsa-miR-181a-5p
	hsa-miR-95-3p			hsa-miR-181a-5p,1
	hsa-miR-186-5p			hsa-miR-378a-5p
	hsa-let-7b-5p			hsa-miR-374a-3p
	hsa-miR-590-5p			hsa-miR-9-3p,2
	hsa-miR-23c			hsa-miR-500a-3p
	hsa-miR-423-5p			hsa-miR-26b-5p
	hsa-miR-32-5p			hsa-miR-378i
	hsa-miR-455-5p			hsa-miR-9-3p
	hsa-miR-19a-3p			hsa-miR-9-3p,1
	hsa-miR-19b-3p			hsa-miR-17-5p
	hsa-miR-27a-3p			hsa-miR-9-5p,1
	hsa-let-7c-5p			hsa-miR-9-5p,2
	hsa-miR-106b-5p			hsa-miR-9-5p
	hsa-miR-342-3p			hsa-miR-196a-5p,1
	hsa-miR-4286			hsa-miR-140-3p
	hsa-miR-98-5p			hsa-miR-1307-5p
	hsa-miR-23b-3p			hsa-miR-196a-5p
	hsa-miR-551b-3p			hsa-miR-151a-3p
	hsa-miR-148b-3p			hsa-let-7g-5p
	hsa-let-7e-5p			hsa-miR-130a-3p
	hsa-miR-100-5p			hsa-miR-148b-3p
	hsa-miR-93-5p			hsa-miR-23a-3p
	hsa-miR-196b-5p			hsa-miR-30d-5p
	hsa-miR-10b-5p			hsa-miR-193b-3p
	hsa-miR-183-5p			hsa-miR-151a-5p
	hsa-miR-874-5p
	hsa-miR-340-5p

## Sheet: Table 5 Downregulated miRNAs
Supplementary table 5: List of downregulated miRNAs from CSC Vs adherent cell identified in each study.
Lung Cancer NCI H1975: Illumina	Ovarian cancer Kuramochi cell l: Microarray	Ovarian cancer SKOV-3: Microarray	Breast Cancer MCF-7, Microarray	Glioma Cells MGG4, MGG8, MGG11: Microarray	Breast cancer (2) MCF-7: Illumina	Colorectal cancer HCT116: illumina
hsa-miR-1247-5p	hsa-miR-205-5p	hsa-miR-145-5p	hsa-miR-3195	hsa-miR-21-3p	hsa-miR-222-5p	hsa-miR-31-3p
hsa-miR-489-3p		hsa-miR-143-3p	hsa-miR-3911	hsa-miR-1273g-3p	hsa-miR-27a-5p	hsa-miR-29b-3p,1
hsa-miR-129-1-3p		hsa-miR-409-3p	hsa-miR-504-5p		hsa-miR-92a-1-5p	hsa-miR-29b-3p
hsa-miR-212-3p		hsa-miR-455-3p	hsa-miR-6831-5p		hsa-miR-25-5p	hsa-miR-542-3p
hsa-miR-548q		hsa-miR-382-5p	hsa-miR-4669		hsa-miR-33b-3p	hsa-miR-34a-3p
hsa-miR-1247-3p		hsa-miR-376a-3p	hsa-miR-6824-5p		hsa-miR-128-1-5p	hsa-miR-374a-5p
hsa-miR-203b-3p		hsa-miR-376c-3p	hsa-miR-3663-3p		hsa-miR-195-3p	hsa-miR-19a-3p
hsa-miR-514a-3p		hsa-miR-495-3p	hsa-miR-8063		hsa-miR-29b-1-5p	hsa-miR-19b-3p
hsa-miR-514a-3p,1		hsa-miR-433-3p	hsa-miR-7162-3p		hsa-miR-219a-1-3p	hsa-miR-19b-3p,1
hsa-miR-514a-3p,2		hsa-miR-127-3p	hsa-miR-3178		hsa-miR-26a-1-3p	hsa-miR-374b-3p
hsa-miR-141-5p		hsa-miR-377-3p	hsa-miR-4298		hsa-miR-27b-5p	hsa-miR-20a-5p
hsa-miR-205-5p		hsa-miR-221-3p	hsa-miR-6812-5p		hsa-miR-125b-1-3p	hsa-miR-551a
hsa-miR-506-3p		hsa-miR-487a-3p	hsa-miR-1909-3p		hsa-miR-4448	hsa-miR-5683
hsa-miR-509-3p		hsa-miR-487b-3p	hsa-miR-7847-3p		hsa-miR-365a-5p	hsa-miR-340-5p
hsa-miR-509-3p,1		hsa-miR-381-3p	hsa-miR-542-5p		hsa-miR-760	hsa-miR-590-3p
hsa-miR-509-3p,2		hsa-miR-889-3p	hsa-miR-503-5p		hsa-let-7f-1-3p	hsa-miR-18a-5p
hsa-miR-577		hsa-miR-432-5p	hsa-miR-6850-5p		hsa-miR-1296-5p	hsa-miR-21-3p
hsa-miR-4454		hsa-miR-543	hsa-miR-424-3p		hsa-miR-301a-5p	hsa-miR-32-3p
hsa-miR-200b-5p		hsa-miR-431-5p	hsa-miR-7107-5p		hsa-miR-671-3p	hsa-miR-561-5p
hsa-miR-200c-3p		hsa-miR-323a-3p	hsa-miR-4689		hsa-miR-181a-2-3p	hsa-miR-15b-3p
hsa-miR-4697-3p		hsa-miR-485-3p	hsa-miR-874-3p		hsa-miR-615-5p	hsa-miR-153-3p
hsa-miR-504-5p		hsa-miR-337-5p	hsa-miR-1307-3p		hsa-miR-4286	hsa-miR-153-3p,1
hsa-miR-4443		hsa-miR-27b-3p	hsa-miR-184		hsa-miR-26b-3p	hsa-miR-100-3p
hsa-miR-203a-3p		hsa-miR-92b-3p	hsa-miR-6765-5p		hsa-miR-130a-5p	hsa-miR-374a-3p
hsa-miR-500b-3p		hsa-miR-379-5p	hsa-miR-346		hsa-miR-30c-1-3p	hsa-let-7g-3p
hsa-miR-224-5p		hsa-miR-199a-5p	hsa-miR-4516		hsa-miR-193b-5p	hsa-miR-1307-5p
hsa-miR-452-5p		hsa-miR-409-5p	hsa-miR-6858-5p		hsa-miR-221-5p	hsa-miR-548e-3p
hsa-miR-3173-5p		hsa-miR-410-3p	hsa-miR-4497		hsa-miR-130b-5p	hsa-miR-101-3p,1
hsa-miR-194-3p		hsa-miR-18a-5p	hsa-miR-149-5p		hsa-miR-6529-3p	hsa-miR-101-3p
hsa-miR-371a-5p		hsa-miR-34c-5p	hsa-miR-200b-5p		hsa-let-7b-3p	hsa-miR-140-5p
hsa-miR-642a-5p		hsa-miR-154-5p	hsa-miR-3141		hsa-miR-744-3p	hsa-miR-106b-5p
hsa-miR-200b-3p		hsa-miR-9-5p	hsa-miR-6126		hsa-miR-454-5p	hsa-miR-188-5p
hsa-miR-200a-5p		hsa-miR-548l	hsa-miR-1225-5p		hsa-miR-26a-2-3p	hsa-miR-331-3p
hsa-miR-130a-3p		hsa-miR-421	hsa-miR-4253		hsa-miR-423-3p	hsa-miR-651-5p
hsa-miR-200a-3p		hsa-miR-1908-5p	hsa-miR-762		hsa-miR-628-5p	hsa-let-7f-1-3p
hsa-miR-1266-5p		hsa-miR-337-3p	hsa-miR-6800-5p		hsa-miR-424-3p	hsa-miR-9-3p
hsa-miR-372-3p		hsa-miR-548a-3p	hsa-miR-6768-5p		hsa-miR-16-2-3p	hsa-miR-9-3p,1
hsa-miR-335-3p		hsa-miR-593-3p	hsa-miR-744-5p		hsa-miR-92b-3p	hsa-miR-141-3p
hsa-miR-642b-5p		hsa-miR-299-5p	hsa-miR-331-5p		hsa-miR-4454	hsa-miR-660-5p
hsa-miR-3661		hsa-miR-149-5p	hsa-miR-663a		hsa-miR-3074-3p	hsa-miR-17-5p
hsa-miR-29b-1-5p		hsa-miR-940	hsa-miR-1469		hsa-miR-1468-5p	hsa-miR-9-3p,2
hsa-miR-1291		hsa-miR-19b-3p	hsa-miR-6816-5p		hsa-miR-330-5p	hsa-miR-30b-5p
hsa-miR-424-3p		hsa-miR-301a-3p	hsa-miR-328-5p		hsa-miR-18a-3p	hsa-miR-455-5p
hsa-miR-362-5p		hsa-miR-30a-3p	hsa-miR-4459		hsa-miR-34a-3p	hsa-miR-30e-5p
hsa-miR-3614-5p		hsa-miR-155-5p	hsa-miR-423-3p		hsa-miR-100-3p	hsa-miR-141-5p
hsa-miR-31-5p			hsa-miR-324-3p		hsa-miR-99b-5p	hsa-miR-185-5p
hsa-miR-1293			hsa-miR-4687-3p		hsa-miR-346	hsa-miR-135b-5p
hsa-miR-339-5p			hsa-miR-423-5p		hsa-miR-7977	hsa-miR-378d,1
hsa-miR-5100			hsa-miR-6775-5p		hsa-miR-152-5p	hsa-miR-577
hsa-miR-4286			hsa-miR-4534		hsa-miR-92a-3p,1	hsa-miR-378d
hsa-miR-378i			hsa-miR-4745-5p		hsa-miR-1307-3p	hsa-miR-200a-3p
hsa-miR-1270			hsa-miR-6871-5p		hsa-miR-193a-5p	hsa-miR-429
hsa-miR-339-3p			hsa-miR-1237-5p		hsa-miR-331-3p	hsa-miR-29a-5p
hsa-miR-138-5p			hsa-miR-193a-5p		hsa-miR-93-3p	hsa-miR-324-5p
hsa-miR-653-5p			hsa-miR-6749-5p		hsa-miR-224-5p	hsa-miR-181c-5p
hsa-miR-141-3p			hsa-miR-940		hsa-miR-484	hsa-miR-30d-3p
hsa-miR-1271-5p			hsa-miR-4270		hsa-miR-149-5p	hsa-miR-32-5p
hsa-miR-3940-3p			hsa-miR-92b-3p		hsa-miR-128-3p,1	hsa-miR-7-1-3p
hsa-miR-502-3p			hsa-miR-320a		hsa-miR-148a-5p	hsa-let-7f-2-3p
hsa-miR-642a-3p			hsa-miR-6722-3p		hsa-miR-3613-3p	hsa-miR-10b-5p
hsa-miR-130b-3p			hsa-miR-6127		hsa-miR-128-3p	hsa-miR-7-5p
hsa-miR-132-5p			hsa-miR-3940-5p		hsa-miR-191-3p	hsa-miR-7-5p,1
hsa-miR-34c-5p			hsa-miR-4634		hsa-miR-125a-3p	hsa-let-7a-3p
hsa-miR-375-3p			hsa-miR-3665		hsa-miR-210-5p	hsa-miR-7-5p,2
hsa-miR-29a-3p			hsa-miR-1915-3p		hsa-miR-92a-3p	hsa-let-7a-3p,1
hsa-miR-181c-3p			hsa-miR-4758-5p		hsa-miR-22-5p	hsa-miR-335-5p
hsa-miR-20a-5p			hsa-miR-339-5p		hsa-miR-99b-3p	hsa-miR-26b-5p
hsa-miR-625-3p			hsa-miR-6125		hsa-miR-106b-3p	hsa-miR-301a-3p
hsa-miR-378c			hsa-miR-486-5p		hsa-miR-100-5p	hsa-miR-190a-5p
hsa-miR-181a-3p			hsa-miR-320b		hsa-miR-125b-5p,1	hsa-miR-24-3p
hsa-miR-10b-5p			hsa-miR-378a-3p		hsa-miR-125b-5p	hsa-miR-24-3p,1
hsa-miR-125b-5p			hsa-miR-6794-5p		hsa-miR-338-5p	hsa-miR-326
hsa-miR-181d-5p			hsa-miR-106b-3p		hsa-miR-30c-2-3p	hsa-miR-146b-5p
hsa-miR-425-3p			hsa-miR-4281		hsa-miR-30d-3p	hsa-miR-378c
hsa-miR-5010-3p			hsa-miR-99b-5p		hsa-miR-423-5p	hsa-miR-29a-3p
hsa-miR-7977			hsa-miR-4488		hsa-miR-1343-3p	hsa-miR-24-2-5p
hsa-miR-345-5p			hsa-miR-3196		hsa-miR-425-3p	hsa-miR-335-3p
hsa-miR-125b-5p,1			hsa-miR-320c		hsa-miR-504-5p	hsa-miR-148b-5p
hsa-miR-1260b			hsa-miR-5787		hsa-miR-1306-5p	hsa-miR-203a-3p
hsa-miR-92a-1-5p			hsa-miR-92a-3p		hsa-miR-1260b	hsa-miR-183-5p
hsa-miR-500a-3p			hsa-miR-6088		hsa-let-7d-3p	hsa-miR-17-3p
hsa-miR-1260a			hsa-miR-4463		hsa-miR-15b-5p	hsa-miR-96-5p
hsa-miR-149-5p					hsa-miR-181a-3p	hsa-miR-301b-3p
hsa-miR-93-5p					hsa-miR-155-5p	hsa-miR-21-5p
hsa-miR-27a-5p					hsa-miR-1260a	hsa-miR-100-5p
hsa-miR-16-5p					hsa-miR-1249-3p	hsa-miR-29c-3p
hsa-miR-125b-1-3p					hsa-let-7c-5p	hsa-miR-374b-5p
hsa-miR-378a-5p					hsa-miR-197-3p	hsa-miR-10a-5p
hsa-miR-361-3p					hsa-miR-331-5p	hsa-miR-148a-5p
hsa-miR-221-3p					hsa-miR-361-3p	hsa-miR-27a-3p
hsa-miR-107					hsa-miR-7-5p	hsa-miR-126-5p
hsa-miR-378a-3p					hsa-miR-455-3p	hsa-miR-454-3p
hsa-miR-550a-5p					hsa-miR-7-5p,1	hsa-miR-148b-3p
hsa-miR-550a-5p,1					hsa-miR-7-5p,2	hsa-miR-23a-3p
hsa-miR-16-5p,1					hsa-miR-22-3p	hsa-miR-200a-5p
hsa-miR-550a-3-5p					hsa-miR-29a-3p	hsa-miR-148a-3p
hsa-miR-550a-3-5p,1					hsa-miR-877-5p	hsa-miR-9-5p
hsa-miR-361-5p					hsa-miR-148b-5p	hsa-miR-9-5p,1
hsa-miR-25-5p					hsa-miR-505-3p	hsa-miR-9-5p,2
hsa-miR-484					hsa-miR-15b-3p	hsa-miR-93-5p
hsa-miR-501-3p					hsa-miR-186-5p	hsa-miR-15b-5p
hsa-miR-532-3p					hsa-miR-25-3p	hsa-miR-30e-3p
hsa-miR-28-3p					hsa-miR-30e-3p	hsa-miR-140-3p
hsa-miR-874-3p					hsa-miR-222-3p	hsa-miR-98-5p
hsa-miR-221-5p					hsa-miR-125a-5p	hsa-miR-769-5p
hsa-miR-185-5p					hsa-miR-30a-3p	hsa-miR-126-3p
hsa-miR-192-5p					hsa-let-7d-5p
hsa-miR-21-3p					hsa-miR-365b-3p
hsa-miR-652-3p					hsa-miR-365a-3p
hsa-miR-140-3p					hsa-let-7a-3p,1
hsa-miR-181b-5p,1					hsa-let-7a-3p
hsa-let-7d-5p					hsa-miR-378a-3p
hsa-miR-181b-5p					hsa-miR-27a-3p
hsa-miR-100-5p					hsa-miR-28-3p
hsa-miR-92a-3p					hsa-let-7f-5p
hsa-let-7b-5p					hsa-miR-30c-5p,1
hsa-miR-503-5p					hsa-miR-30c-5p
hsa-miR-342-3p					hsa-miR-574-3p
hsa-miR-23b-3p					hsa-miR-615-3p
hsa-miR-629-5p					hsa-miR-421
hsa-miR-183-5p					hsa-miR-196b-5p
hsa-miR-182-5p					hsa-miR-320a-3p
hsa-miR-1275					hsa-miR-107
hsa-miR-92a-3p,1					hsa-let-7a-5p,1
hsa-miR-25-3p					hsa-let-7a-5p,2
					hsa-let-7a-5p
					hsa-let-7f-5p,1
					hsa-let-7b-5p
					hsa-miR-425-5p
					hsa-miR-16-5p,1
					hsa-miR-16-5p

## Sheet: Table 6 Gene regulated miR 1246
Supplementary table 6: All genes reported to be regulated by hsa-miR 1246
gene_name	gene_id	mirna_name	mirna_id	experiments	publications	cell_lines	micro_tscore
MT-ND5	ENSG00000198786	hsa-miR-1246	MIMAT0005898	7	4	7	0.43
GOLPH3	ENSG00000113384	hsa-miR-1246	MIMAT0005898	6	4	6	0.63
KLK8	ENSG00000129455	hsa-miR-1246	MIMAT0005898	6	4	6	-1.00
MAP3K5	ENSG00000197442	hsa-miR-1246	MIMAT0005898	6	2	6	0.47
UBE2D2	ENSG00000131508	hsa-miR-1246	MIMAT0005898	6	2	6	0.71
CALM2	ENSG00000143933	hsa-miR-1246	MIMAT0005898	5	6	5	0.66
CHD1	ENSG00000153922	hsa-miR-1246	MIMAT0005898	5	5	5	0.52
FNDC3A	ENSG00000102531	hsa-miR-1246	MIMAT0005898	5	2	5	0.85
LRRC8A	ENSG00000136802	hsa-miR-1246	MIMAT0005898	5	3	3	0.43
RBM12	ENSG00000244462	hsa-miR-1246	MIMAT0005898	5	3	5	0.53
YWHAE	ENSG00000108953	hsa-miR-1246	MIMAT0005898	5	2	5	-1.00
AL662899.1	ENSG00000204422	hsa-miR-1246	MIMAT0005898	4	2	4	-1.00
BTG2	ENSG00000159388	hsa-miR-1246	MIMAT0005898	4	4	4	-1.00
C5ORF24	ENSG00000181904	hsa-miR-1246	MIMAT0005898	4	2	4	0.47
DR1	ENSG00000117505	hsa-miR-1246	MIMAT0005898	4	3	4	0.68
GCLM	ENSG00000023909	hsa-miR-1246	MIMAT0005898	4	1	1	0.61
MOAP1	ENSG00000165943	hsa-miR-1246	MIMAT0005898	4	3	4	-1.00
NOTCH2	ENSG00000134250	hsa-miR-1246	MIMAT0005898	4	3	4	0.61
PPP1R12A	ENSG00000058272	hsa-miR-1246	MIMAT0005898	4	2	4	-1.00
SCAMP1	ENSG00000085365	hsa-miR-1246	MIMAT0005898	4	2	4	0.48
SLC38A2	ENSG00000134294	hsa-miR-1246	MIMAT0005898	4	2	4	0.95
UBE2V2	ENSG00000169139	hsa-miR-1246	MIMAT0005898	4	2	4	0.47
AFF1	ENSG00000172493	hsa-miR-1246	MIMAT0005898	3	2	2	-1.00
ANKRD17	ENSG00000132466	hsa-miR-1246	MIMAT0005898	3	2	3	0.48
AP3M2	ENSG00000070718	hsa-miR-1246	MIMAT0005898	3	1	3	0.38
CAPZA1	ENSG00000116489	hsa-miR-1246	MIMAT0005898	3	2	3	0.67
CCNI	ENSG00000118816	hsa-miR-1246	MIMAT0005898	3	2	3	0.39
CDK6	ENSG00000105810	hsa-miR-1246	MIMAT0005898	3	2	3	0.59
CLOCK	ENSG00000134852	hsa-miR-1246	MIMAT0005898	3	1	3	0.58
CNOT4	ENSG00000080802	hsa-miR-1246	MIMAT0005898	3	2	3	0.42
CNOT8	ENSG00000155508	hsa-miR-1246	MIMAT0005898	3	2	3	0.55
DHX15	ENSG00000109606	hsa-miR-1246	MIMAT0005898	3	2	3	0.54
EIF4G2	ENSG00000110321	hsa-miR-1246	MIMAT0005898	3	3	3	0.66
EPM2AIP1	ENSG00000178567	hsa-miR-1246	MIMAT0005898	3	1	3	0.92
FCHO2	ENSG00000157107	hsa-miR-1246	MIMAT0005898	3	2	3	0.44
GIGYF2	ENSG00000204120	hsa-miR-1246	MIMAT0005898	3	2	3	0.89
KHDC4	ENSG00000132680	hsa-miR-1246	MIMAT0005898	3	2	3	-1.00
LSM14A	ENSG00000257103	hsa-miR-1246	MIMAT0005898	3	2	3	0.42
MBNL1	ENSG00000152601	hsa-miR-1246	MIMAT0005898	3	2	3	0.59
MCL1	ENSG00000143384	hsa-miR-1246	MIMAT0005898	3	2	3	0.48
MEF2A	ENSG00000068305	hsa-miR-1246	MIMAT0005898	3	2	3	0.49
MOSMO	ENSG00000185716	hsa-miR-1246	MIMAT0005898	3	3	3	0.65
POU2F1	ENSG00000143190	hsa-miR-1246	MIMAT0005898	3	2	3	0.66
PRRC2C	ENSG00000117523	hsa-miR-1246	MIMAT0005898	3	2	3	0.59
SLAIN1	ENSG00000139737	hsa-miR-1246	MIMAT0005898	3	2	3	0.87
SNX19	ENSG00000120451	hsa-miR-1246	MIMAT0005898	3	2	2	0.75
TRUB1	ENSG00000165832	hsa-miR-1246	MIMAT0005898	3	2	3	0.38
UBE3A	ENSG00000114062	hsa-miR-1246	MIMAT0005898	3	2	3	0.69
VAPB	ENSG00000124164	hsa-miR-1246	MIMAT0005898	3	4	3	0.57
VTA1	ENSG00000009844	hsa-miR-1246	MIMAT0005898	3	2	3	0.72
YWHAQ	ENSG00000134308	hsa-miR-1246	MIMAT0005898	3	2	3	0.53
ZNF146	ENSG00000167635	hsa-miR-1246	MIMAT0005898	3	4	3	0.45
ZNF431	ENSG00000196705	hsa-miR-1246	MIMAT0005898	3	2	3	0.84
ADRB1	ENSG00000043591	hsa-miR-1246	MIMAT0005898	2	2	2	0.53
2002-08-01	ENSG00000123908	hsa-miR-1246	MIMAT0005898	2	2	2	0.51
2004-08-01	ENSG00000134698	hsa-miR-1246	MIMAT0005898	2	2	2	-1.00
ALDH9A1	ENSG00000143149	hsa-miR-1246	MIMAT0005898	2	1	2	0.43
ARL6IP5	ENSG00000144746	hsa-miR-1246	MIMAT0005898	2	2	2	-1.00
ASH1L	ENSG00000116539	hsa-miR-1246	MIMAT0005898	2	2	2	0.55
BBX	ENSG00000114439	hsa-miR-1246	MIMAT0005898	2	1	2	0.49
BZW1	ENSG00000082153	hsa-miR-1246	MIMAT0005898	2	2	2	0.69
CCND2	ENSG00000118971	hsa-miR-1246	MIMAT0005898	2	3	2	0.62
DDX24	ENSG00000089737	hsa-miR-1246	MIMAT0005898	2	1	2	0.40
DNAJA2	ENSG00000069345	hsa-miR-1246	MIMAT0005898	2	2	2	0.56
DYNLL2	ENSG00000264364	hsa-miR-1246	MIMAT0005898	2	1	2	-1.00
EDRF1	ENSG00000107938	hsa-miR-1246	MIMAT0005898	2	2	2	0.57
ELAVL1	ENSG00000066044	hsa-miR-1246	MIMAT0005898	2	1	2	0.37
ENY2	ENSG00000120533	hsa-miR-1246	MIMAT0005898	2	1	2	-1.00
FAM214A	ENSG00000047346	hsa-miR-1246	MIMAT0005898	2	1	2	0.67
FEM1C	ENSG00000145780	hsa-miR-1246	MIMAT0005898	2	1	2	-1.00
FOS	ENSG00000170345	hsa-miR-1246	MIMAT0005898	2	2	2	0.60
FRMD4B	ENSG00000114541	hsa-miR-1246	MIMAT0005898	2	1	2	0.44
GNAI2	ENSG00000114353	hsa-miR-1246	MIMAT0005898	2	2	2	-1.00
GTF2A2	ENSG00000140307	hsa-miR-1246	MIMAT0005898	2	1	2	-1.00
HECTD1	ENSG00000092148	hsa-miR-1246	MIMAT0005898	2	2	2	0.39
HUWE1	ENSG00000086758	hsa-miR-1246	MIMAT0005898	2	1	1	0.57
IKZF1	ENSG00000185811	hsa-miR-1246	MIMAT0005898	2	1	2	0.43
KIF18A	ENSG00000121621	hsa-miR-1246	MIMAT0005898	2	1	2	-1.00
LAMP2	ENSG00000005893	hsa-miR-1246	MIMAT0005898	2	1	2	0.37
LIG4	ENSG00000174405	hsa-miR-1246	MIMAT0005898	2	2	2	0.50
MARF1	ENSG00000166783	hsa-miR-1246	MIMAT0005898	2	1	2	0.60
MFAP1	ENSG00000140259	hsa-miR-1246	MIMAT0005898	2	2	2	0.50
MINK1	ENSG00000141503	hsa-miR-1246	MIMAT0005898	2	2	2	0.42
MRPS16	ENSG00000182180	hsa-miR-1246	MIMAT0005898	2	1	2	-1.00
MTO1	ENSG00000135297	hsa-miR-1246	MIMAT0005898	2	1	2	0.40
NDUFA8	ENSG00000119421	hsa-miR-1246	MIMAT0005898	2	1	2	0.46
NOL7	ENSG00000225921	hsa-miR-1246	MIMAT0005898	2	2	2	-1.00
NPTN	ENSG00000156642	hsa-miR-1246	MIMAT0005898	2	2	2	-1.00
OAS3	ENSG00000111331	hsa-miR-1246	MIMAT0005898	2	1	2	0.44
OR4A15	ENSG00000181958	hsa-miR-1246	MIMAT0005898	2	1	2	0.51
PLPP3	ENSG00000162407	hsa-miR-1246	MIMAT0005898	2	2	2	0.45
PPHLN1	ENSG00000134283	hsa-miR-1246	MIMAT0005898	2	1	2	0.84
PPP2CB	ENSG00000104695	hsa-miR-1246	MIMAT0005898	2	2	2	0.77
PSIP1	ENSG00000164985	hsa-miR-1246	MIMAT0005898	2	2	2	0.83
PSMB7	ENSG00000136930	hsa-miR-1246	MIMAT0005898	2	2	2	-1.00
PURB	ENSG00000146676	hsa-miR-1246	MIMAT0005898	2	3	2	0.90
RAB8A	ENSG00000167461	hsa-miR-1246	MIMAT0005898	2	2	2	-1.00
RPRD2	ENSG00000163125	hsa-miR-1246	MIMAT0005898	2	1	2	-1.00
RREB1	ENSG00000124782	hsa-miR-1246	MIMAT0005898	2	1	2	0.44
SAV1	ENSG00000151748	hsa-miR-1246	MIMAT0005898	2	2	2	0.46
SEL1L	ENSG00000071537	hsa-miR-1246	MIMAT0005898	2	1	2	0.45
SIRT1	ENSG00000096717	hsa-miR-1246	MIMAT0005898	2	2	2	0.56
STX16	ENSG00000124222	hsa-miR-1246	MIMAT0005898	2	2	2	0.66
STYX	ENSG00000198252	hsa-miR-1246	MIMAT0005898	2	1	2	0.86
TAB2	ENSG00000055208	hsa-miR-1246	MIMAT0005898	2	1	2	-1.00
THAP5	ENSG00000177683	hsa-miR-1246	MIMAT0005898	2	1	2	0.44
TMEM164	ENSG00000157600	hsa-miR-1246	MIMAT0005898	2	1	2	0.42
TPD52	ENSG00000076554	hsa-miR-1246	MIMAT0005898	2	2	2	0.55
TRIP12	ENSG00000153827	hsa-miR-1246	MIMAT0005898	2	2	2	0.78
UBA2	ENSG00000126261	hsa-miR-1246	MIMAT0005898	2	2	2	-1.00
UBE2D3	ENSG00000109332	hsa-miR-1246	MIMAT0005898	2	1	2	0.74
UBR5	ENSG00000104517	hsa-miR-1246	MIMAT0005898	2	2	2	0.57
VGLL4	ENSG00000144560	hsa-miR-1246	MIMAT0005898	2	2	2	-1.00
VPS39	ENSG00000166887	hsa-miR-1246	MIMAT0005898	2	2	2	0.52
WEE1	ENSG00000166483	hsa-miR-1246	MIMAT0005898	2	2	2	-1.00
WNK1	ENSG00000060237	hsa-miR-1246	MIMAT0005898	2	1	2	0.56
XRCC4	ENSG00000152422	hsa-miR-1246	MIMAT0005898	2	1	2	-1.00
ZBED6	ENSG00000257315	hsa-miR-1246	MIMAT0005898	2	2	2	0.61
ZNF253	ENSG00000256771	hsa-miR-1246	MIMAT0005898	2	1	2	-1.00
ZNF623	ENSG00000183309	hsa-miR-1246	MIMAT0005898	2	1	2	0.47
ZNF652	ENSG00000198740	hsa-miR-1246	MIMAT0005898	2	2	2	0.47
ZNF714	ENSG00000160352	hsa-miR-1246	MIMAT0005898	2	2	2	0.71
ZNF90	ENSG00000213988	hsa-miR-1246	MIMAT0005898	2	1	2	0.41
AC080038.1	ENSG00000011028	hsa-miR-1246	MIMAT0005898	1	1	1	0.38
ACAP2	ENSG00000114331	hsa-miR-1246	MIMAT0005898	1	1	1	0.40
ACO2	ENSG00000100412	hsa-miR-1246	MIMAT0005898	1	1	1	0.39
ADAM10	ENSG00000137845	hsa-miR-1246	MIMAT0005898	1	1	1	0.58
ADD3	ENSG00000148700	hsa-miR-1246	MIMAT0005898	1	1	1	-1.00
AKAP13	ENSG00000170776	hsa-miR-1246	MIMAT0005898	1	1	1	0.45
ALG10B	ENSG00000175548	hsa-miR-1246	MIMAT0005898	1	1	1	0.79
ALG13	ENSG00000101901	hsa-miR-1246	MIMAT0005898	1	1	1	0.46
ALKBH4	ENSG00000160993	hsa-miR-1246	MIMAT0005898	1	1	1	-1.00
ANKRA2	ENSG00000164331	hsa-miR-1246	MIMAT0005898	1	1	1	-1.00
ANKRD12	ENSG00000101745	hsa-miR-1246	MIMAT0005898	1	1	1	0.67
ANXA1	ENSG00000135046	hsa-miR-1246	MIMAT0005898	1	1	1	0.38
AP1G1	ENSG00000166747	hsa-miR-1246	MIMAT0005898	1	1	1	0.48
ARHGEF9	ENSG00000131089	hsa-miR-1246	MIMAT0005898	1	1	1	0.45
ARPC2	ENSG00000163466	hsa-miR-1246	MIMAT0005898	1	1	1	0.52
ASCC3	ENSG00000112249	hsa-miR-1246	MIMAT0005898	1	1	1	0.52
ASF1A	ENSG00000111875	hsa-miR-1246	MIMAT0005898	1	1	1	0.51
ATL1	ENSG00000198513	hsa-miR-1246	MIMAT0005898	1	1	1	0.69
ATP2B1	ENSG00000070961	hsa-miR-1246	MIMAT0005898	1	1	1	0.75
ATP5F1B	ENSG00000110955	hsa-miR-1246	MIMAT0005898	1	1	1	-1.00
ATP6V0E1	ENSG00000113732	hsa-miR-1246	MIMAT0005898	1	1	1	-1.00
ATXN1L	ENSG00000224470	hsa-miR-1246	MIMAT0005898	1	1	1	0.43
ATXN7L3B	ENSG00000253719	hsa-miR-1246	MIMAT0005898	1	1	1	0.72
AVL9	ENSG00000105778	hsa-miR-1246	MIMAT0005898	1	1	1	0.42
BCL9	ENSG00000116128	hsa-miR-1246	MIMAT0005898	1	1	1	0.77
BPTF	ENSG00000171634	hsa-miR-1246	MIMAT0005898	1	1	1	0.38
BRD8	ENSG00000112983	hsa-miR-1246	MIMAT0005898	1	1	1	-1.00
BRI3BP	ENSG00000184992	hsa-miR-1246	MIMAT0005898	1	1	1	0.87
BRIX1	ENSG00000113460	hsa-miR-1246	MIMAT0005898	1	1	1	-1.00
BUB3	ENSG00000154473	hsa-miR-1246	MIMAT0005898	1	1	1	0.68
C4ORF46	ENSG00000205208	hsa-miR-1246	MIMAT0005898	1	1	1	0.40
C8ORF76	ENSG00000189376	hsa-miR-1246	MIMAT0005898	1	1	1	0.43
CACNA2D3	ENSG00000157445	hsa-miR-1246	MIMAT0005898	1	1	1	0.44
CAPZA2	ENSG00000198898	hsa-miR-1246	MIMAT0005898	1	1	1	0.43
CASP7	ENSG00000165806	hsa-miR-1246	MIMAT0005898	1	1	1	0.51
CAST	ENSG00000153113	hsa-miR-1246	MIMAT0005898	1	1	1	0.39
CCNE2	ENSG00000175305	hsa-miR-1246	MIMAT0005898	1	1	1	0.37
CD274	ENSG00000120217	hsa-miR-1246	MIMAT0005898	1	1	1	0.70
CDC123	ENSG00000151465	hsa-miR-1246	MIMAT0005898	1	1	1	0.57
CDC42SE2	ENSG00000158985	hsa-miR-1246	MIMAT0005898	1	1	1	0.40
CDC73	ENSG00000134371	hsa-miR-1246	MIMAT0005898	1	1	1	0.88
CDK1	ENSG00000170312	hsa-miR-1246	MIMAT0005898	1	1	1	-1.00
CDKN3	ENSG00000100526	hsa-miR-1246	MIMAT0005898	1	1	1	0.41
CDV3	ENSG00000091527	hsa-miR-1246	MIMAT0005898	1	1	1	0.49
CEBPB	ENSG00000172216	hsa-miR-1246	MIMAT0005898	1	1	1	0.41
CHD2	ENSG00000173575	hsa-miR-1246	MIMAT0005898	1	1	1	0.46
CHMP3	ENSG00000115561	hsa-miR-1246	MIMAT0005898	1	1	1	0.84
CHTF8	ENSG00000168802	hsa-miR-1246	MIMAT0005898	1	1	1	0.60
CIDEB	ENSG00000136305	hsa-miR-1246	MIMAT0005898	1	1	1	-1.00
CISD2	ENSG00000145354	hsa-miR-1246	MIMAT0005898	1	1	1	0.51
CKAP2	ENSG00000136108	hsa-miR-1246	MIMAT0005898	1	1	1	-1.00
CLCN5	ENSG00000171365	hsa-miR-1246	MIMAT0005898	1	1	1	0.55
CLTC	ENSG00000141367	hsa-miR-1246	MIMAT0005898	1	1	1	0.43
CPEB4	ENSG00000113742	hsa-miR-1246	MIMAT0005898	1	1	1	0.56
CPSF2	ENSG00000165934	hsa-miR-1246	MIMAT0005898	1	1	1	0.92
CPT1C	ENSG00000169169	hsa-miR-1246	MIMAT0005898	1	1	1	-1.00
CRYBG1	ENSG00000112297	hsa-miR-1246	MIMAT0005898	1	1	1	0.50
CSNK2A2	ENSG00000070770	hsa-miR-1246	MIMAT0005898	1	1	1	-1.00
CTDSPL2	ENSG00000137770	hsa-miR-1246	MIMAT0005898	1	1	1	0.38
CYRIB	ENSG00000153310	hsa-miR-1246	MIMAT0005898	1	1	1	0.57
DAAM1	ENSG00000100592	hsa-miR-1246	MIMAT0005898	1	1	1	0.57
DCAF13	ENSG00000164934	hsa-miR-1246	MIMAT0005898	1	1	1	-1.00
DCAF6	ENSG00000143164	hsa-miR-1246	MIMAT0005898	1	1	1	-1.00
DENND4C	ENSG00000137145	hsa-miR-1246	MIMAT0005898	1	1	1	0.46
DENND6A	ENSG00000174839	hsa-miR-1246	MIMAT0005898	1	1	1	0.40
DERPC	ENSG00000286140	hsa-miR-1246	MIMAT0005898	1	1	1	0.42
EEF1G	ENSG00000254772	hsa-miR-1246	MIMAT0005898	1	1	1	-1.00
EGLN1	ENSG00000135766	hsa-miR-1246	MIMAT0005898	1	1	1	0.54
EHD4	ENSG00000103966	hsa-miR-1246	MIMAT0005898	1	1	1	0.38
EIF2AK4	ENSG00000128829	hsa-miR-1246	MIMAT0005898	1	1	1	0.47
EIF4A1	ENSG00000161960	hsa-miR-1246	MIMAT0005898	1	1	1	0.53
EIF5	ENSG00000100664	hsa-miR-1246	MIMAT0005898	1	1	1	0.45
ENO2	ENSG00000111674	hsa-miR-1246	MIMAT0005898	1	1	1	0.41
ETNK1	ENSG00000139163	hsa-miR-1246	MIMAT0005898	1	1	1	0.56
EXOC1	ENSG00000090989	hsa-miR-1246	MIMAT0005898	1	1	1	-1.00
FAM135A	ENSG00000082269	hsa-miR-1246	MIMAT0005898	1	1	1	0.49
FAM161A	ENSG00000170264	hsa-miR-1246	MIMAT0005898	1	1	1	-1.00
FAM169A	ENSG00000198780	hsa-miR-1246	MIMAT0005898	1	1	1	0.49
FAM8A1	ENSG00000137414	hsa-miR-1246	MIMAT0005898	1	1	1	0.54
FBXO8	ENSG00000164117	hsa-miR-1246	MIMAT0005898	1	1	1	0.63
FCF1	ENSG00000119616	hsa-miR-1246	MIMAT0005898	1	1	1	0.54
FEM1B	ENSG00000169018	hsa-miR-1246	MIMAT0005898	1	1	1	0.77
FOXC1	ENSG00000054598	hsa-miR-1246	MIMAT0005898	1	1	1	-1.00
FOXN2	ENSG00000170802	hsa-miR-1246	MIMAT0005898	1	1	1	0.42
FOXP2	ENSG00000128573	hsa-miR-1246	MIMAT0005898	1	1	1	0.83
FREM2	ENSG00000150893	hsa-miR-1246	MIMAT0005898	1	1	1	0.37
FRK	ENSG00000111816	hsa-miR-1246	MIMAT0005898	1	1	1	0.90
FYCO1	ENSG00000163820	hsa-miR-1246	MIMAT0005898	1	1	1	0.46
G3BP2	ENSG00000138757	hsa-miR-1246	MIMAT0005898	1	1	1	0.47
GAB1	ENSG00000109458	hsa-miR-1246	MIMAT0005898	1	1	1	0.51
GIMAP4	ENSG00000133574	hsa-miR-1246	MIMAT0005898	1	1	1	0.47
GIT1	ENSG00000108262	hsa-miR-1246	MIMAT0005898	1	1	1	-1.00
GOLGA1	ENSG00000136935	hsa-miR-1246	MIMAT0005898	1	1	1	0.95
GORASP2	ENSG00000115806	hsa-miR-1246	MIMAT0005898	1	1	1	-1.00
GPATCH8	ENSG00000186566	hsa-miR-1246	MIMAT0005898	1	1	1	-1.00
GPR174	ENSG00000147138	hsa-miR-1246	MIMAT0005898	1	1	1	0.43
GRM5	ENSG00000168959	hsa-miR-1246	MIMAT0005898	1	1	1	0.47
GRPR	ENSG00000126010	hsa-miR-1246	MIMAT0005898	1	1	1	0.52
GSK3B	ENSG00000082701	hsa-miR-1246	MIMAT0005898	1	1	1	0.79
GTPBP1	ENSG00000100226	hsa-miR-1246	MIMAT0005898	1	1	1	0.49
H1-0	ENSG00000189060	hsa-miR-1246	MIMAT0005898	1	1	1	-1.00
HEATR5A	ENSG00000129493	hsa-miR-1246	MIMAT0005898	1	1	1	-1.00
HIBCH	ENSG00000198130	hsa-miR-1246	MIMAT0005898	1	1	1	-1.00
HIST1H2BD	ENSG00000158373	hsa-miR-1246	MIMAT0005898	1	1	1	-1.00
HMCES	ENSG00000183624	hsa-miR-1246	MIMAT0005898	1	1	1	-1.00
HNRNPA2B1	ENSG00000122566	hsa-miR-1246	MIMAT0005898	1	1	1	-1.00
HNRNPF	ENSG00000169813	hsa-miR-1246	MIMAT0005898	1	1	1	-1.00
HS2ST1	ENSG00000153936	hsa-miR-1246	MIMAT0005898	1	1	1	0.59
ICK	ENSG00000112144	hsa-miR-1246	MIMAT0005898	1	1	1	0.52
IL6ST	ENSG00000134352	hsa-miR-1246	MIMAT0005898	1	1	1	0.58
ILF3	ENSG00000129351	hsa-miR-1246	MIMAT0005898	1	1	1	0.39
INSIG1	ENSG00000186480	hsa-miR-1246	MIMAT0005898	1	1	1	0.59
IQSEC1	ENSG00000144711	hsa-miR-1246	MIMAT0005898	1	1	1	0.42
IQSEC2	ENSG00000124313	hsa-miR-1246	MIMAT0005898	1	1	1	0.36
ISCA1	ENSG00000135070	hsa-miR-1246	MIMAT0005898	1	1	1	0.79
ISOC1	ENSG00000066583	hsa-miR-1246	MIMAT0005898	1	1	1	-1.00
ITCH	ENSG00000078747	hsa-miR-1246	MIMAT0005898	1	1	1	0.68
KDM2A	ENSG00000173120	hsa-miR-1246	MIMAT0005898	1	1	1	0.41
KIAA2026	ENSG00000183354	hsa-miR-1246	MIMAT0005898	1	1	1	0.51
KIF2C	ENSG00000142945	hsa-miR-1246	MIMAT0005898	1	1	1	-1.00
KLHL15	ENSG00000174010	hsa-miR-1246	MIMAT0005898	1	2	1	0.76
KLHL36	ENSG00000135686	hsa-miR-1246	MIMAT0005898	1	1	1	0.37
KMT2D	ENSG00000167548	hsa-miR-1246	MIMAT0005898	1	1	1	0.78
KMT5B	ENSG00000110066	hsa-miR-1246	MIMAT0005898	1	1	1	-1.00
KPNA1	ENSG00000114030	hsa-miR-1246	MIMAT0005898	1	1	1	0.48
KPNA4	ENSG00000186432	hsa-miR-1246	MIMAT0005898	1	1	1	0.53
KREMEN1	ENSG00000183762	hsa-miR-1246	MIMAT0005898	1	1	1	0.65
LAMTOR3	ENSG00000109270	hsa-miR-1246	MIMAT0005898	1	1	1	0.47
LARP1	ENSG00000155506	hsa-miR-1246	MIMAT0005898	1	1	1	0.41
LCOR	ENSG00000196233	hsa-miR-1246	MIMAT0005898	1	1	1	0.60
LIN7A	ENSG00000111052	hsa-miR-1246	MIMAT0005898	1	1	1	0.90
LINS1	ENSG00000140471	hsa-miR-1246	MIMAT0005898	1	1	1	-1.00
LMAN1	ENSG00000074695	hsa-miR-1246	MIMAT0005898	1	1	1	0.53
LNPEP	ENSG00000113441	hsa-miR-1246	MIMAT0005898	1	1	1	0.74
LSM11	ENSG00000155858	hsa-miR-1246	MIMAT0005898	1	1	1	0.45
LYSMD3	ENSG00000176018	hsa-miR-1246	MIMAT0005898	1	1	1	0.47
LZIC	ENSG00000162441	hsa-miR-1246	MIMAT0005898	1	1	1	0.37
MACC1	ENSG00000183742	hsa-miR-1246	MIMAT0005898	1	1	1	0.56
MACF1	ENSG00000127603	hsa-miR-1246	MIMAT0005898	1	1	1	0.51
MAD2L1	ENSG00000164109	hsa-miR-1246	MIMAT0005898	1	1	1	0.37
MALT1	ENSG00000172175	hsa-miR-1246	MIMAT0005898	1	1	1	0.64
MAP3K2	ENSG00000169967	hsa-miR-1246	MIMAT0005898	1	1	1	0.51
MAP4	ENSG00000047849	hsa-miR-1246	MIMAT0005898	1	1	1	0.40
MAP4K3	ENSG00000011566	hsa-miR-1246	MIMAT0005898	1	1	1	-1.00
MARCHF6	ENSG00000145495	hsa-miR-1246	MIMAT0005898	1	1	1	0.80
MAT2B	ENSG00000038274	hsa-miR-1246	MIMAT0005898	1	1	1	0.58
MBLAC2	ENSG00000176055	hsa-miR-1246	MIMAT0005898	1	1	1	0.42
MDH1	ENSG00000014641	hsa-miR-1246	MIMAT0005898	1	1	1	-1.00
MDM2	ENSG00000135679	hsa-miR-1246	MIMAT0005898	1	1	1	0.38
MED8	ENSG00000159479	hsa-miR-1246	MIMAT0005898	1	1	1	-1.00
MIER3	ENSG00000155545	hsa-miR-1246	MIMAT0005898	1	1	1	0.67
MLLT3	ENSG00000171843	hsa-miR-1246	MIMAT0005898	1	1	1	0.80
MOB1A	ENSG00000114978	hsa-miR-1246	MIMAT0005898	1	1	1	0.43
MTA3	ENSG00000057935	hsa-miR-1246	MIMAT0005898	1	1	1	0.39
MT-CO1	ENSG00000198804	hsa-miR-1246	MIMAT0005898	1	1	1	0.46
MT-CO3	ENSG00000198938	hsa-miR-1246	MIMAT0005898	1	1	1	-1.00
MTF2	ENSG00000143033	hsa-miR-1246	MIMAT0005898	1	1	1	0.59
MT-ND2	ENSG00000198763	hsa-miR-1246	MIMAT0005898	1	1	1	-1.00
MT-ND3	ENSG00000198840	hsa-miR-1246	MIMAT0005898	1	1	1	-1.00
MT-ND4	ENSG00000198886	hsa-miR-1246	MIMAT0005898	1	1	1	-1.00
MYEF2	ENSG00000104177	hsa-miR-1246	MIMAT0005898	1	1	1	0.75
NA	ENSG00000203546	hsa-miR-1246	MIMAT0005898	1	1	1	0.53
NAB1	ENSG00000138386	hsa-miR-1246	MIMAT0005898	1	1	1	0.46
NANP	ENSG00000170191	hsa-miR-1246	MIMAT0005898	1	1	1	0.57
NCAM2	ENSG00000154654	hsa-miR-1246	MIMAT0005898	1	1	1	0.80
NCBP2	ENSG00000114503	hsa-miR-1246	MIMAT0005898	1	1	1	-1.00
NCKAP1	ENSG00000061676	hsa-miR-1246	MIMAT0005898	1	1	1	0.81
NCOA1	ENSG00000084676	hsa-miR-1246	MIMAT0005898	1	1	1	0.43
NEO1	ENSG00000067141	hsa-miR-1246	MIMAT0005898	1	1	1	0.52
NET1	ENSG00000173848	hsa-miR-1246	MIMAT0005898	1	1	1	-1.00
NFIA	ENSG00000162599	hsa-miR-1246	MIMAT0005898	1	1	1	0.79
NIPAL1	ENSG00000163293	hsa-miR-1246	MIMAT0005898	1	1	1	0.45
NIPBL	ENSG00000164190	hsa-miR-1246	MIMAT0005898	1	1	1	0.89
NME1	ENSG00000239672	hsa-miR-1246	MIMAT0005898	1	1	1	0.45
NR1D2	ENSG00000174738	hsa-miR-1246	MIMAT0005898	1	1	1	-1.00
NUFIP2	ENSG00000108256	hsa-miR-1246	MIMAT0005898	1	1	1	0.67
NUP155	ENSG00000113569	hsa-miR-1246	MIMAT0005898	1	1	1	0.60
OGT	ENSG00000147162	hsa-miR-1246	MIMAT0005898	1	1	1	0.40
PAN3	ENSG00000152520	hsa-miR-1246	MIMAT0005898	1	1	1	0.51
PAPOLA	ENSG00000090060	hsa-miR-1246	MIMAT0005898	1	1	1	0.75
PARP16	ENSG00000138617	hsa-miR-1246	MIMAT0005898	1	1	1	0.51
PCBP1	ENSG00000169564	hsa-miR-1246	MIMAT0005898	1	1	1	0.51
PCBP2	ENSG00000197111	hsa-miR-1246	MIMAT0005898	1	1	1	0.55
PCNA	ENSG00000132646	hsa-miR-1246	MIMAT0005898	1	1	1	-1.00
PDHB	ENSG00000168291	hsa-miR-1246	MIMAT0005898	1	1	1	-1.00
PEAK1	ENSG00000173517	hsa-miR-1246	MIMAT0005898	1	1	1	0.91
PGBD1	ENSG00000137338	hsa-miR-1246	MIMAT0005898	1	3	1	-1.00
PHB	ENSG00000167085	hsa-miR-1246	MIMAT0005898	1	1	1	0.42
PHF12	ENSG00000109118	hsa-miR-1246	MIMAT0005898	1	1	1	-1.00
PHLPP1	ENSG00000081913	hsa-miR-1246	MIMAT0005898	1	1	1	0.39
PIK3C2B	ENSG00000133056	hsa-miR-1246	MIMAT0005898	1	1	1	0.48
PIK3R4	ENSG00000196455	hsa-miR-1246	MIMAT0005898	1	1	1	0.42
PIKFYVE	ENSG00000115020	hsa-miR-1246	MIMAT0005898	1	1	1	0.43
PIP4K2B	ENSG00000276293	hsa-miR-1246	MIMAT0005898	1	1	1	0.46
PLAG1	ENSG00000181690	hsa-miR-1246	MIMAT0005898	1	1	1	0.80
POLL	ENSG00000166169	hsa-miR-1246	MIMAT0005898	1	1	1	-1.00
PPFIA2	ENSG00000139220	hsa-miR-1246	MIMAT0005898	1	1	1	0.38
PPM1K	ENSG00000163644	hsa-miR-1246	MIMAT0005898	1	1	1	0.47
PPP1CB	ENSG00000213639	hsa-miR-1246	MIMAT0005898	1	1	1	0.79
PPP1CC	ENSG00000186298	hsa-miR-1246	MIMAT0005898	1	1	1	0.42
PRKAR1A	ENSG00000108946	hsa-miR-1246	MIMAT0005898	1	1	1	0.40
PRKCB	ENSG00000166501	hsa-miR-1246	MIMAT0005898	1	1	1	0.57
PROSER1	ENSG00000120685	hsa-miR-1246	MIMAT0005898	1	1	1	0.44
PSMA1	ENSG00000129084	hsa-miR-1246	MIMAT0005898	1	1	1	-1.00
PSMG2	ENSG00000128789	hsa-miR-1246	MIMAT0005898	1	1	1	0.43
PTAR1	ENSG00000188647	hsa-miR-1246	MIMAT0005898	1	1	1	0.88
RAB10	ENSG00000084733	hsa-miR-1246	MIMAT0005898	1	1	1	0.61
RAB18	ENSG00000099246	hsa-miR-1246	MIMAT0005898	1	1	1	0.85
RAB2A	ENSG00000104388	hsa-miR-1246	MIMAT0005898	1	1	1	-1.00
RAB36	ENSG00000100228	hsa-miR-1246	MIMAT0005898	1	1	1	0.42
RAB7A	ENSG00000075785	hsa-miR-1246	MIMAT0005898	1	1	1	0.44
RABGEF1	ENSG00000154710	hsa-miR-1246	MIMAT0005898	1	1	1	0.42
RAP2A	ENSG00000125249	hsa-miR-1246	MIMAT0005898	1	3	1	0.37
RAP2C	ENSG00000123728	hsa-miR-1246	MIMAT0005898	1	1	1	0.72
RASA1	ENSG00000145715	hsa-miR-1246	MIMAT0005898	1	1	1	0.92
RASGEF1A	ENSG00000198915	hsa-miR-1246	MIMAT0005898	1	1	1	0.55
RB1CC1	ENSG00000023287	hsa-miR-1246	MIMAT0005898	1	1	1	-1.00
RBFOX2	ENSG00000100320	hsa-miR-1246	MIMAT0005898	1	1	1	0.40
RBL1	ENSG00000080839	hsa-miR-1246	MIMAT0005898	1	1	1	0.80
RC3H2	ENSG00000056586	hsa-miR-1246	MIMAT0005898	1	1	1	0.90
RGL1	ENSG00000143344	hsa-miR-1246	MIMAT0005898	1	1	1	-1.00
RHEBL1	ENSG00000167550	hsa-miR-1246	MIMAT0005898	1	1	1	-1.00
RORA	ENSG00000069667	hsa-miR-1246	MIMAT0005898	1	1	1	0.91
RPL15	ENSG00000174748	hsa-miR-1246	MIMAT0005898	1	1	1	-1.00
RPL35	ENSG00000136942	hsa-miR-1246	MIMAT0005898	1	1	1	0.37
RPS10	ENSG00000124614	hsa-miR-1246	MIMAT0005898	1	1	1	-1.00
RPS21	ENSG00000171858	hsa-miR-1246	MIMAT0005898	1	1	1	0.50
RRM2B	ENSG00000048392	hsa-miR-1246	MIMAT0005898	1	1	1	0.52
RSPRY1	ENSG00000159579	hsa-miR-1246	MIMAT0005898	1	1	1	-1.00
SAMD9L	ENSG00000177409	hsa-miR-1246	MIMAT0005898	1	1	1	0.46
SAR1A	ENSG00000079332	hsa-miR-1246	MIMAT0005898	1	1	1	0.51
SATB1	ENSG00000182568	hsa-miR-1246	MIMAT0005898	1	1	1	0.44
SDHB	ENSG00000117118	hsa-miR-1246	MIMAT0005898	1	1	1	0.44
SDHC	ENSG00000143252	hsa-miR-1246	MIMAT0005898	1	1	1	-1.00
SEC31A	ENSG00000138674	hsa-miR-1246	MIMAT0005898	1	1	1	-1.00
SEPHS1	ENSG00000086475	hsa-miR-1246	MIMAT0005898	1	1	1	0.72
SERTAD2	ENSG00000179833	hsa-miR-1246	MIMAT0005898	1	1	1	0.64
SLC20A1	ENSG00000144136	hsa-miR-1246	MIMAT0005898	1	1	1	-1.00
SLC44A1	ENSG00000070214	hsa-miR-1246	MIMAT0005898	1	1	1	0.63
SLIT2	ENSG00000145147	hsa-miR-1246	MIMAT0005898	1	1	1	0.37
SMAD5	ENSG00000113658	hsa-miR-1246	MIMAT0005898	1	1	1	0.43
SPCS3	ENSG00000129128	hsa-miR-1246	MIMAT0005898	1	1	1	0.61
SPECC1L	ENSG00000100014	hsa-miR-1246	MIMAT0005898	1	1	1	0.38
SPRED1	ENSG00000166068	hsa-miR-1246	MIMAT0005898	1	1	1	0.42
SPRED2	ENSG00000198369	hsa-miR-1246	MIMAT0005898	1	1	1	0.51
SPTBN1	ENSG00000115306	hsa-miR-1246	MIMAT0005898	1	1	1	0.42
SRI	ENSG00000075142	hsa-miR-1246	MIMAT0005898	1	1	1	0.50
SRPK1	ENSG00000096063	hsa-miR-1246	MIMAT0005898	1	2	1	0.48
SS18	ENSG00000141380	hsa-miR-1246	MIMAT0005898	1	1	1	0.45
STAG2	ENSG00000101972	hsa-miR-1246	MIMAT0005898	1	1	1	-1.00
STARD3NL	ENSG00000010270	hsa-miR-1246	MIMAT0005898	1	1	1	0.40
STAU1	ENSG00000124214	hsa-miR-1246	MIMAT0005898	1	1	1	0.65
STRN	ENSG00000115808	hsa-miR-1246	MIMAT0005898	1	1	1	0.59
SUGT1	ENSG00000165416	hsa-miR-1246	MIMAT0005898	1	1	1	0.61
SYAP1	ENSG00000169895	hsa-miR-1246	MIMAT0005898	1	1	1	0.43
SYNE1	ENSG00000131018	hsa-miR-1246	MIMAT0005898	1	1	1	0.38
SYT3	ENSG00000213023	hsa-miR-1246	MIMAT0005898	1	1	1	-1.00
TAOK1	ENSG00000160551	hsa-miR-1246	MIMAT0005898	1	1	1	0.93
TATDN3	ENSG00000203705	hsa-miR-1246	MIMAT0005898	1	1	1	-1.00
TCERG1	ENSG00000113649	hsa-miR-1246	MIMAT0005898	1	1	1	-1.00
TCF4	ENSG00000196628	hsa-miR-1246	MIMAT0005898	1	1	1	0.48
TEAD1	ENSG00000187079	hsa-miR-1246	MIMAT0005898	1	1	1	0.90
TET2	ENSG00000168769	hsa-miR-1246	MIMAT0005898	1	1	1	0.64
THRA	ENSG00000126351	hsa-miR-1246	MIMAT0005898	1	1	1	-1.00
TLN2	ENSG00000171914	hsa-miR-1246	MIMAT0005898	1	1	1	0.54
TMPO	ENSG00000120802	hsa-miR-1246	MIMAT0005898	1	1	1	0.44
TMTC3	ENSG00000139324	hsa-miR-1246	MIMAT0005898	1	1	1	0.58
TNPO1	ENSG00000083312	hsa-miR-1246	MIMAT0005898	1	1	1	0.54
TNRC6B	ENSG00000100354	hsa-miR-1246	MIMAT0005898	1	1	1	0.71
TOB1	ENSG00000141232	hsa-miR-1246	MIMAT0005898	1	1	1	0.49
TOPBP1	ENSG00000163781	hsa-miR-1246	MIMAT0005898	1	1	1	0.41
TOR3A	ENSG00000186283	hsa-miR-1246	MIMAT0005898	1	1	1	-1.00
TP53INP1	ENSG00000164938	hsa-miR-1246	MIMAT0005898	1	1	1	0.40
TRAPPC10	ENSG00000160218	hsa-miR-1246	MIMAT0005898	1	1	1	0.52
TRDMT1	ENSG00000107614	hsa-miR-1246	MIMAT0005898	1	1	1	0.83
TUBA1B	ENSG00000123416	hsa-miR-1246	MIMAT0005898	1	1	1	0.54
TXNRD1	ENSG00000198431	hsa-miR-1246	MIMAT0005898	1	1	1	0.46
U2SURP	ENSG00000163714	hsa-miR-1246	MIMAT0005898	1	1	1	0.39
UBE2E1	ENSG00000170142	hsa-miR-1246	MIMAT0005898	1	1	1	-1.00
UBE2L6	ENSG00000156587	hsa-miR-1246	MIMAT0005898	1	1	1	-1.00
UBE2R2	ENSG00000107341	hsa-miR-1246	MIMAT0005898	1	1	1	0.35
UEVLD	ENSG00000151116	hsa-miR-1246	MIMAT0005898	1	1	1	0.40
UPF2	ENSG00000151461	hsa-miR-1246	MIMAT0005898	1	1	1	0.51
USP10	ENSG00000103194	hsa-miR-1246	MIMAT0005898	1	1	1	0.62
UTP4	ENSG00000141076	hsa-miR-1246	MIMAT0005898	1	1	1	0.49
VAMP3	ENSG00000049245	hsa-miR-1246	MIMAT0005898	1	1	1	0.40
VHL	ENSG00000134086	hsa-miR-1246	MIMAT0005898	1	1	1	0.45
VKORC1	ENSG00000167397	hsa-miR-1246	MIMAT0005898	1	1	1	0.37
VPS53	ENSG00000141252	hsa-miR-1246	MIMAT0005898	1	1	1	0.87
VPS54	ENSG00000143952	hsa-miR-1246	MIMAT0005898	1	1	1	0.40
WDR59	ENSG00000103091	hsa-miR-1246	MIMAT0005898	1	1	1	0.40
WDR74	ENSG00000133316	hsa-miR-1246	MIMAT0005898	1	1	1	0.64
WRN	ENSG00000165392	hsa-miR-1246	MIMAT0005898	1	1	1	0.42
WWTR1	ENSG00000018408	hsa-miR-1246	MIMAT0005898	1	1	1	0.46
XRCC5	ENSG00000079246	hsa-miR-1246	MIMAT0005898	1	1	1	-1.00
YARS	ENSG00000134684	hsa-miR-1246	MIMAT0005898	1	1	1	0.40
YTHDF3	ENSG00000185728	hsa-miR-1246	MIMAT0005898	1	1	1	0.44
ZBED4	ENSG00000100426	hsa-miR-1246	MIMAT0005898	1	1	1	0.37
ZBTB21	ENSG00000173276	hsa-miR-1246	MIMAT0005898	1	1	1	0.82
ZBTB41	ENSG00000177888	hsa-miR-1246	MIMAT0005898	1	1	1	0.62
ZBTB7A	ENSG00000178951	hsa-miR-1246	MIMAT0005898	1	1	1	0.38
ZBTB7B	ENSG00000160685	hsa-miR-1246	MIMAT0005898	1	1	1	-1.00
ZC3HAV1L	ENSG00000146858	hsa-miR-1246	MIMAT0005898	1	1	1	-1.00
ZCCHC12	ENSG00000174460	hsa-miR-1246	MIMAT0005898	1	1	1	-1.00
ZCCHC8	ENSG00000033030	hsa-miR-1246	MIMAT0005898	1	1	1	-1.00
ZFHX4	ENSG00000091656	hsa-miR-1246	MIMAT0005898	1	1	1	0.47
ZFP1	ENSG00000184517	hsa-miR-1246	MIMAT0005898	1	1	1	0.39
ZFP36L2	ENSG00000152518	hsa-miR-1246	MIMAT0005898	1	1	1	-1.00
ZFP69	ENSG00000187815	hsa-miR-1246	MIMAT0005898	1	1	1	0.43
ZKSCAN1	ENSG00000106261	hsa-miR-1246	MIMAT0005898	1	1	1	0.50
ZMAT3	ENSG00000172667	hsa-miR-1246	MIMAT0005898	1	1	1	0.65
ZMYM3	ENSG00000147130	hsa-miR-1246	MIMAT0005898	1	1	1	-1.00
ZNF12	ENSG00000164631	hsa-miR-1246	MIMAT0005898	1	1	1	0.55
ZNF124	ENSG00000196418	hsa-miR-1246	MIMAT0005898	1	1	1	0.90
ZNF227	ENSG00000131115	hsa-miR-1246	MIMAT0005898	1	1	1	0.80
ZNF254	ENSG00000213096	hsa-miR-1246	MIMAT0005898	1	1	1	0.73
ZNF260	ENSG00000254004	hsa-miR-1246	MIMAT0005898	1	1	1	0.43
ZNF292	ENSG00000188994	hsa-miR-1246	MIMAT0005898	1	1	1	0.53
ZNF420	ENSG00000197050	hsa-miR-1246	MIMAT0005898	1	1	1	0.80
ZNF462	ENSG00000148143	hsa-miR-1246	MIMAT0005898	1	1	1	1.00
ZNF484	ENSG00000127081	hsa-miR-1246	MIMAT0005898	1	1	1	0.52
ZNF507	ENSG00000168813	hsa-miR-1246	MIMAT0005898	1	1	1	0.78
ZNF551	ENSG00000204519	hsa-miR-1246	MIMAT0005898	1	1	1	0.41
ZNF557	ENSG00000130544	hsa-miR-1246	MIMAT0005898	1	1	1	0.46
ZNF644	ENSG00000122482	hsa-miR-1246	MIMAT0005898	1	1	1	0.44
ZNF780B	ENSG00000128000	hsa-miR-1246	MIMAT0005898	1	1	1	0.69
ZNF850	ENSG00000267041	hsa-miR-1246	MIMAT0005898	1	1	1	0.48
ZUP1	ENSG00000153975	hsa-miR-1246	MIMAT0005898	1	1	1	-1.00
ZWILCH	ENSG00000174442	hsa-miR-1246	MIMAT0005898	1	1	1	-1.00
ZNF644	ENSG00000122482	hsa-miR-1246	MIMAT0005898	1	1	1	0.44
ZNF780B	ENSG00000128000	hsa-miR-1246	MIMAT0005898	1	1	1	0.69
ZNF850	ENSG00000267041	hsa-miR-1246	MIMAT0005898	1	1	1	0.48
ZUP1	ENSG00000153975	hsa-miR-1246	MIMAT0005898	1	1	1	-1.00
ZWILCH	ENSG00000174442	hsa-miR-1246	MIMAT0005898	1	1	1	-1.00

## Sheet: Table 7 KEGG
Supplementary table 7: Enrichment analysis identified by KEGG from genes regulated by hsa-miR 1246
Category	Term	Count	%	P-Value	Fold Enrichment	Benjamini	FDR
KEGG_PATHWAY	Cell cycle	16	3.5	3.3e-05	3.6	0.0088	0.0084
KEGG_PATHWAY	Ubiquitin mediated proteolysis	13	2.9	0.00063	3.2	0.084	0.081
KEGG_PATHWAY	Diabetic cardiomyopathy	15	3.3	0.0017	2.6	0.12	0.12
KEGG_PATHWAY	Pathways of neurodegeneration - multiple diseases	26	5.8	0.0018	1.9	0.12	0.12
KEGG_PATHWAY	Alzheimer disease	22	4.9	0.0026	2	0.14	0.13
KEGG_PATHWAY	Parkinson disease	17	3.8	0.0033	2.3	0.15	0.14
KEGG_PATHWAY	Oxidative phosphorylation	11	2.4	0.0044	2.9	0.15	0.14
KEGG_PATHWAY	Endocytosis	16	3.5	0.0045	2.3	0.15	0.14
KEGG_PATHWAY	Non-homologous end-joining	4	0.9	0.0051	10.9	0.15	0.14
KEGG_PATHWAY	Huntington disease	18	4	0.0056	2.1	0.15	0.14
KEGG_PATHWAY	Amyotrophic lateral sclerosis	20	4.4	0.0067	2	0.16	0.16
KEGG_PATHWAY	Citrate cycle (TCA cycle)	5	1.1	0.0093	5.9	0.2	0.19
KEGG_PATHWAY	Prion disease	16	3.5	0.0094	2.1	0.2	0.19
KEGG_PATHWAY	Oocyte meiosis	10	2.2	0.011	2.7	0.22	0.21
KEGG_PATHWAY	Cellular senescence	11	2.4	0.012	2.5	0.22	0.21
KEGG_PATHWAY	Hippo signaling pathway	11	2.4	0.013	2.5	0.22	0.21
KEGG_PATHWAY	Herpes simplex virus 1 infection	24	5.3	0.017	1.7	0.26	0.25
KEGG_PATHWAY	p53 signaling pathway	7	1.5	0.017	3.4	0.26	0.25
KEGG_PATHWAY	Viral carcinogenesis	12	2.7	0.028	2.1	0.4	0.39
KEGG_PATHWAY	Non-alcoholic fatty liver disease	10	2.2	0.03	2.3	0.41	0.39
KEGG_PATHWAY	Dopaminergic synapse	9	2	0.032	2.4	0.41	0.4
KEGG_PATHWAY	Gap junction	7	1.5	0.037	2.8	0.45	0.43
KEGG_PATHWAY	Measles	9	2	0.04	2.3	0.47	0.45
KEGG_PATHWAY	Amphetamine addiction	6	1.3	0.044	3.1	0.49	0.47
KEGG_PATHWAY	Hippo signaling pathway - multiple species	4	0.9	0.047	4.9	0.49	0.47
KEGG_PATHWAY	Salmonella infection	13	2.9	0.048	1.9	0.49	0.47
KEGG_PATHWAY	Chemical carcinogenesis - reactive oxygen species	12	2.7	0.049	1.9	0.49	0.47
KEGG_PATHWAY	mRNA surveillance pathway	7	1.5	0.055	2.6	0.53	0.51
KEGG_PATHWAY	Thermogenesis	12	2.7	0.062	1.8	0.58	0.55
KEGG_PATHWAY	RNA degradation	6	1.3	0.071	2.7	0.64	0.61
KEGG_PATHWAY	Polycomb repressive complex	6	1.3	0.087	2.5	0.75	0.72
KEGG_PATHWAY	Autophagy - animal	9	2	0.093	1.9	0.78	0.75

## Sheet: Table 8 GO BP
Supplementary table 8: Gene ontology analysis for the hsa-miR-1246 target genes, biological process
Category	Term	Count	%	P-Value	Fold Enrichment	Benjamini	FDR
GOTERM_BP_DIRECT	proteasome-mediated ubiquitin-dependent protein catabolic process	19	4.2	3e-06	3.8	0.0064	0.0063
GOTERM_BP_DIRECT	positive regulation of transcription from RNA polymerase II promoter	52	11.5	9.3e-06	1.9	0.0084	0.0083
GOTERM_BP_DIRECT	negative regulation of transcription from RNA polymerase II promoter	45	10	1.2e-05	2	0.0084	0.0083
GOTERM_BP_DIRECT	regulation of transcription from RNA polymerase II promoter	62	13.7	1.6e-05	1.8	0.0084	0.0083
GOTERM_BP_DIRECT	regulation of transcription, DNA-templated	43	9.5	2.3e-05	2	0.01	0.01
GOTERM_BP_DIRECT	ubiquitin-dependent protein catabolic process	17	3.8	5.9e-05	3.3	0.021	0.021
GOTERM_BP_DIRECT	protein polyubiquitination	13	2.9	0.00027	3.6	0.081	0.081
GOTERM_BP_DIRECT	mitochondrial ATP synthesis coupled proton transport	8	1.8	0.00055	5.6	0.15	0.15
GOTERM_BP_DIRECT	regulation of circadian rhythm	8	1.8	0.00066	5.4	0.16	0.16
GOTERM_BP_DIRECT	circadian regulation of gene expression	8	1.8	0.00093	5.1	0.19	0.19
GOTERM_BP_DIRECT	cell division	20	4.4	0.00097	2.4	0.19	0.19
GOTERM_BP_DIRECT	protein K48-linked ubiquitination	8	1.8	0.0015	4.7	0.26	0.26
GOTERM_BP_DIRECT	chromatin organization	14	3.1	0.0016	2.8	0.26	0.26
GOTERM_BP_DIRECT	positive regulation of nuclear-transcribed mRNA poly(A) tail shortening	4	0.9	0.0026	14	0.39	0.39
GOTERM_BP_DIRECT	DNA repair	16	3.5	0.0029	2.4	0.39	0.39
GOTERM_BP_DIRECT	retrograde transport, endosome to Golgi	8	1.8	0.0034	4.1	0.39	0.39
GOTERM_BP_DIRECT	cellular response to hydrogen peroxide	7	1.5	0.0035	4.7	0.39	0.39
GOTERM_BP_DIRECT	aerobic respiration	7	1.5	0.0038	4.7	0.39	0.39
GOTERM_BP_DIRECT	protein ubiquitination	21	4.6	0.0038	2	0.39	0.39
GOTERM_BP_DIRECT	positive regulation of nuclear-transcribed mRNA catabolic process, deadenylation-dependent decay	4	0.9	0.0039	12.1	0.39	0.39
GOTERM_BP_DIRECT	Golgi to plasma membrane protein transport	5	1.1	0.004	7.6	0.39	0.39
GOTERM_BP_DIRECT	negative regulation of transcription, DNA-templated	24	5.3	0.0042	1.9	0.39	0.39
GOTERM_BP_DIRECT	regulation of translational initiation	5	1.1	0.0045	7.3	0.39	0.39
GOTERM_BP_DIRECT	protein phosphorylation	18	4	0.0045	2.2	0.39	0.39
GOTERM_BP_DIRECT	electron transport coupled proton transport	3	0.7	0.0046	27.2	0.39	0.39
GOTERM_BP_DIRECT	positive regulation of transcription, DNA-templated	28	6.2	0.0048	1.8	0.39	0.39
GOTERM_BP_DIRECT	phosphorylation	25	5.5	0.0058	1.8	0.46	0.46
GOTERM_BP_DIRECT	cellular response to DNA damage stimulus	15	3.3	0.0061	2.3	0.47	0.46
GOTERM_BP_DIRECT	protein transport	20	4.4	0.0065	2	0.48	0.48
GOTERM_BP_DIRECT	hippo signaling	4	0.9	0.0067	10.1	0.48	0.48
GOTERM_BP_DIRECT	chromatin remodeling	16	3.5	0.0075	2.2	0.5	0.5
GOTERM_BP_DIRECT	double-strand break repair via nonhomologous end joining	5	1.1	0.0078	6.3	0.5	0.5
GOTERM_BP_DIRECT	tricarboxylic acid cycle	5	1.1	0.0078	6.3	0.5	0.5
GOTERM_BP_DIRECT	positive regulation of protein export from nucleus	4	0.9	0.0091	9.1	0.57	0.57
GOTERM_BP_DIRECT	RIG-I signaling pathway	3	0.7	0.0094	19.5	0.57	0.57
GOTERM_BP_DIRECT	regulation of gene expression	12	2.7	0.0096	2.5	0.57	0.57
GOTERM_BP_DIRECT	hematopoietic stem cell differentiation	4	0.9	0.01	8.7	0.57	0.57
GOTERM_BP_DIRECT	regulation of ARF protein signal transduction	4	0.9	0.01	8.7	0.57	0.57
GOTERM_BP_DIRECT	negative regulation of translational initiation	4	0.9	0.01	8.7	0.57	0.57
GOTERM_BP_DIRECT	cell cycle	16	3.5	0.011	2.1	0.6	0.6
GOTERM_BP_DIRECT	apoptotic process	23	5.1	0.012	1.8	0.63	0.63
GOTERM_BP_DIRECT	positive regulation of adaptive immune response	3	0.7	0.012	17	0.63	0.63
GOTERM_BP_DIRECT	MAPK cascade	8	1.8	0.014	3.1	0.7	0.7
GOTERM_BP_DIRECT	double-strand break repair via classical nonhomologous end joining	3	0.7	0.016	15.1	0.76	0.76
GOTERM_BP_DIRECT	endocytic recycling	6	1.3	0.017	4	0.8	0.8
GOTERM_BP_DIRECT	Golgi organization	8	1.8	0.017	3	0.81	0.81
GOTERM_BP_DIRECT	heart development	11	2.4	0.018	2.4	0.81	0.81
GOTERM_BP_DIRECT	mitochondrial electron transport, NADH to ubiquinone	5	1.1	0.018	4.9	0.81	0.81
GOTERM_BP_DIRECT	mRNA 3'-end processing	4	0.9	0.019	7	0.81	0.81
GOTERM_BP_DIRECT	response to oxidative stress	8	1.8	0.019	3	0.81	0.81
GOTERM_BP_DIRECT	cellular response to X-ray	3	0.7	0.019	13.6	0.81	0.81
GOTERM_BP_DIRECT	protein targeting to lysosome	4	0.9	0.023	6.5	0.91	0.91
GOTERM_BP_DIRECT	stress granule assembly	4	0.9	0.023	6.5	0.91	0.91
GOTERM_BP_DIRECT	protein localization to kinetochore	3	0.7	0.023	12.4	0.91	0.91
GOTERM_BP_DIRECT	proteolysis involved in cellular protein catabolic process	5	1.1	0.024	4.5	0.91	0.91
GOTERM_BP_DIRECT	protein monoubiquitination	5	1.1	0.024	4.5	0.91	0.91
GOTERM_BP_DIRECT	positive regulation of viral genome replication	4	0.9	0.025	6.3	0.92	0.92
GOTERM_BP_DIRECT	protein modification by small protein conjugation	4	0.9	0.025	6.3	0.92	0.92
GOTERM_BP_DIRECT	protein autoubiquitination	6	1.3	0.026	3.6	0.92	0.92
GOTERM_BP_DIRECT	positive regulation of G1/S transition of mitotic cell cycle	5	1.1	0.027	4.4	0.92	0.92
GOTERM_BP_DIRECT	double-strand break repair	6	1.3	0.027	3.5	0.92	0.92
GOTERM_BP_DIRECT	progesterone receptor signaling pathway	3	0.7	0.027	11.4	0.92	0.92
GOTERM_BP_DIRECT	regulation of chromatin organization	3	0.7	0.027	11.4	0.92	0.92
GOTERM_BP_DIRECT	mitotic spindle assembly checkpoint	4	0.9	0.028	6.1	0.92	0.92
GOTERM_BP_DIRECT	negative regulation of apoptotic process	19	4.2	0.032	1.7	1	1
GOTERM_BP_DIRECT	regulation of apoptotic process	11	2.4	0.034	2.1	1	1
GOTERM_BP_DIRECT	negative regulation of fat cell differentiation	5	1.1	0.036	4	1	1
GOTERM_BP_DIRECT	posttranscriptional gene silencing by RNA	3	0.7	0.037	9.7	1	1
GOTERM_BP_DIRECT	positive regulation of translation	6	1.3	0.038	3.2	1	1
GOTERM_BP_DIRECT	glycogen metabolic process	4	0.9	0.038	5.3	1	1
GOTERM_BP_DIRECT	DNA synthesis involved in DNA repair	3	0.7	0.042	9.1	1	1
GOTERM_BP_DIRECT	production of miRNAs involved in gene silencing by miRNA	3	0.7	0.042	9.1	1	1
GOTERM_BP_DIRECT	negative regulation of androgen receptor signaling pathway	3	0.7	0.042	9.1	1	1
GOTERM_BP_DIRECT	cargo loading into COPII-coated vesicle	3	0.7	0.042	9.1	1	1
GOTERM_BP_DIRECT	neuron projection morphogenesis	5	1.1	0.043	3.8	1	1
GOTERM_BP_DIRECT	positive regulation of female receptivity	2	0.4	0.043	45.4	1	1
GOTERM_BP_DIRECT	viral RNA genome replication	2	0.4	0.043	45.4	1	1
GOTERM_BP_DIRECT	regulation of SMAD protein import into nucleus	2	0.4	0.043	45.4	1	1
GOTERM_BP_DIRECT	negative regulation of extent of heterochromatin assembly	2	0.4	0.043	45.4	1	1
GOTERM_BP_DIRECT	negative regulation of gene expression	13	2.9	0.044	1.9	1	1
GOTERM_BP_DIRECT	positive regulation of protein targeting to mitochondrion	4	0.9	0.044	5	1	1
GOTERM_BP_DIRECT	vesicle-mediated transport	10	2.2	0.044	2.2	1	1
GOTERM_BP_DIRECT	negative regulation of autophagy	5	1.1	0.045	3.7	1	1
GOTERM_BP_DIRECT	negative regulation of neuron apoptotic process	8	1.8	0.045	2.5	1	1
GOTERM_BP_DIRECT	muscle cell differentiation	3	0.7	0.047	8.5	1	1
GOTERM_BP_DIRECT	DNA duplex unwinding	5	1.1	0.047	3.7	1	1
GOTERM_BP_DIRECT	mRNA export from nucleus	5	1.1	0.05	3.6	1	1
GOTERM_BP_DIRECT	DNA replication	7	1.5	0.051	2.6	1	1
GOTERM_BP_DIRECT	actin cytoskeleton organization	10	2.2	0.052	2.1	1	1
GOTERM_BP_DIRECT	response to hydrogen peroxide	4	0.9	0.054	4.7	1	1
GOTERM_BP_DIRECT	cellular response to ionizing radiation	4	0.9	0.057	4.5	1	1
GOTERM_BP_DIRECT	RNA metabolic process	3	0.7	0.058	7.6	1	1
GOTERM_BP_DIRECT	response to X-ray	3	0.7	0.058	7.6	1	1
GOTERM_BP_DIRECT	G1/S transition of mitotic cell cycle	5	1.1	0.06	3.4	1	1
GOTERM_BP_DIRECT	protein localization to nucleus	4	0.9	0.061	4.4	1	1
GOTERM_BP_DIRECT	endoplasmic reticulum organization	4	0.9	0.061	4.4	1	1
GOTERM_BP_DIRECT	osteoblast differentiation	7	1.5	0.061	2.5	1	1
GOTERM_BP_DIRECT	negative regulation of translation	6	1.3	0.063	2.8	1	1
GOTERM_BP_DIRECT	autophagy	8	1.8	0.063	2.3	1	1
GOTERM_BP_DIRECT	viral release from host cell	3	0.7	0.064	7.2	1	1
GOTERM_BP_DIRECT	cellular response to rapamycin	2	0.4	0.064	30.3	1	1
GOTERM_BP_DIRECT	cellular response to sterol	2	0.4	0.064	30.3	1	1
GOTERM_BP_DIRECT	regulation of protein deacetylation	2	0.4	0.064	30.3	1	1
GOTERM_BP_DIRECT	protein localization to plasma membrane	8	1.8	0.067	2.2	1	1
GOTERM_BP_DIRECT	regulation of autophagy	5	1.1	0.068	3.2	1	1
GOTERM_BP_DIRECT	negative regulation of peptidyl-threonine phosphorylation	3	0.7	0.071	6.8	1	1
GOTERM_BP_DIRECT	barbed-end actin filament capping	3	0.7	0.071	6.8	1	1
GOTERM_BP_DIRECT	cellular response to epidermal growth factor stimulus	4	0.9	0.072	4.1	1	1
GOTERM_BP_DIRECT	positive regulation of cysteine-type endopeptidase activity involved in apoptotic process	4	0.9	0.076	4	1	1
GOTERM_BP_DIRECT	positive regulation of insulin receptor signaling pathway	3	0.7	0.077	6.5	1	1
GOTERM_BP_DIRECT	mRNA destabilization	3	0.7	0.077	6.5	1	1
GOTERM_BP_DIRECT	response to antibiotic	3	0.7	0.077	6.5	1	1
GOTERM_BP_DIRECT	positive regulation of translational initiation	3	0.7	0.077	6.5	1	1
GOTERM_BP_DIRECT	SMAD protein signal transduction	4	0.9	0.08	3.9	1	1
GOTERM_BP_DIRECT	response to insulin	5	1.1	0.083	3	1	1
GOTERM_BP_DIRECT	phosphatidylinositol-3-phosphate biosynthetic process	3	0.7	0.083	6.2	1	1
GOTERM_BP_DIRECT	regulation of dendrite morphogenesis	3	0.7	0.083	6.2	1	1
GOTERM_BP_DIRECT	nuclear-transcribed mRNA poly(A) tail shortening	3	0.7	0.083	6.2	1	1
GOTERM_BP_DIRECT	regulation of embryonic development	4	0.9	0.084	3.9	1	1
GOTERM_BP_DIRECT	DNA ligation involved in DNA repair	2	0.4	0.085	22.7	1	1
GOTERM_BP_DIRECT	oocyte growth	2	0.4	0.085	22.7	1	1
GOTERM_BP_DIRECT	transcription from RNA polymerase II promoter	10	2.2	0.085	1.9	1	1
GOTERM_BP_DIRECT	cerebellum development	4	0.9	0.088	3.8	1	1
GOTERM_BP_DIRECT	skeletal muscle cell differentiation	4	0.9	0.088	3.8	1	1
GOTERM_BP_DIRECT	regulation of cyclin-dependent protein serine/threonine kinase activity	4	0.9	0.088	3.8	1	1
GOTERM_BP_DIRECT	execution phase of apoptosis	3	0.7	0.09	5.9	1	1
GOTERM_BP_DIRECT	macromolecular complex assembly	7	1.5	0.091	2.3	1	1
GOTERM_BP_DIRECT	cellular response to amino acid starvation	4	0.9	0.093	3.7	1	1
GOTERM_BP_DIRECT	gene expression	7	1.5	0.096	2.2	1	1
GOTERM_BP_DIRECT	cellular response to glucocorticoid stimulus	3	0.7	0.097	5.7	1	1
GOTERM_BP_DIRECT	positive regulation of protein autophosphorylation	3	0.7	0.097	5.7	1	1
GOTERM_BP_DIRECT	negative regulation of type I interferon-mediated signaling pathway	3	0.7	0.097	5.7	1	1
GOTERM_BP_DIRECT	G2/M transition of mitotic cell cycle	4	0.9	0.097	3.6	1	1
GOTERM_BP_DIRECT	positive regulation of transcription elongation from RNA polymerase II promoter	4	0.9	0.097	3.6	1	1
GOTERM_BP_DIRECT	positive regulation of apoptotic process	12	2.7	0.098	1.7	1	1
GOTERM_BP_DIRECT	cerebral cortex development	5	1.1	0.099	2.8	1	1

## Sheet: Table 9 GO CC
Supplementary table 9: Gene ontology analysis for the hsa-miR-1246 target genes, cellular component
Category	Term	Count	%	P-Value	Fold Enrichment	Benjamini	FDR
GOTERM_CC_DIRECT	cytosol	213	47.1	4.8e-22	1.8	2.4e-19	2.4e-19
GOTERM_CC_DIRECT	nucleoplasm	171	37.8	1.3e-21	2	3.2e-19	3.1e-19
GOTERM_CC_DIRECT	nucleus	212	46.9	4.2e-17	1.6	7e-15	6.9e-15
GOTERM_CC_DIRECT	cytoplasm	175	38.7	2e-08	1.4	2.5e-06	2.4e-06
GOTERM_CC_DIRECT	cytoplasmic stress granule	11	2.4	4.4e-05	5.3	0.0044	0.0043
GOTERM_CC_DIRECT	extracellular exosome	74	16.4	0.00018	1.5	0.015	0.014
GOTERM_CC_DIRECT	P-body	10	2.2	0.0003	4.7	0.021	0.021
GOTERM_CC_DIRECT	endosome membrane	17	3.8	0.00049	2.8	0.03	0.03
GOTERM_CC_DIRECT	respiratory chain	6	1.3	0.00055	8.7	0.031	0.03
GOTERM_CC_DIRECT	postsynaptic density	15	3.3	0.00069	2.9	0.034	0.034
GOTERM_CC_DIRECT	intracellular membrane-bounded organelle	35	7.7	0.0013	1.8	0.06	0.059
GOTERM_CC_DIRECT	phagocytic vesicle membrane	8	1.8	0.0022	4.4	0.091	0.089
GOTERM_CC_DIRECT	focal adhesion	20	4.4	0.0024	2.2	0.093	0.091
GOTERM_CC_DIRECT	ribonucleoprotein complex	15	3.3	0.0033	2.5	0.12	0.12
GOTERM_CC_DIRECT	centrosome	26	5.8	0.0038	1.9	0.12	0.12
GOTERM_CC_DIRECT	glutamatergic synapse	19	4.2	0.0039	2.1	0.12	0.12
GOTERM_CC_DIRECT	macromolecular complex	27	6	0.0042	1.8	0.12	0.12
GOTERM_CC_DIRECT	chromatin	38	8.4	0.0045	1.6	0.12	0.12
GOTERM_CC_DIRECT	DNA-dependent protein kinase-DNA ligase 4 complex	3	0.7	0.009	19.9	0.21	0.21
GOTERM_CC_DIRECT	PTW/PP1 phosphatase complex	3	0.7	0.009	19.9	0.21	0.21
GOTERM_CC_DIRECT	trans-Golgi network membrane	8	1.8	0.0095	3.4	0.21	0.21
GOTERM_CC_DIRECT	endoplasmic reticulum tubular network	4	0.9	0.0098	8.9	0.21	0.21
GOTERM_CC_DIRECT	chromosome	13	2.9	0.0098	2.4	0.21	0.21
GOTERM_CC_DIRECT	ubiquitin ligase complex	8	1.8	0.011	3.3	0.22	0.22
GOTERM_CC_DIRECT	recycling endosome membrane	8	1.8	0.011	3.3	0.22	0.22
GOTERM_CC_DIRECT	nonhomologous end joining complex	3	0.7	0.012	17.4	0.22	0.22
GOTERM_CC_DIRECT	mitotic spindle	9	2	0.012	2.9	0.22	0.22
GOTERM_CC_DIRECT	Golgi apparatus	36	8	0.012	1.5	0.22	0.22
GOTERM_CC_DIRECT	cyclin-dependent protein kinase holoenzyme complex	5	1.1	0.013	5.4	0.23	0.22
GOTERM_CC_DIRECT	cytosolic ribosome	7	1.5	0.015	3.5	0.25	0.24
GOTERM_CC_DIRECT	mitochondrion	44	9.7	0.015	1.4	0.25	0.24
GOTERM_CC_DIRECT	clathrin-coated vesicle	6	1.3	0.017	4	0.27	0.26
GOTERM_CC_DIRECT	perinuclear region of cytoplasm	26	5.8	0.019	1.6	0.28	0.27
GOTERM_CC_DIRECT	ruffle	7	1.5	0.019	3.3	0.28	0.27
GOTERM_CC_DIRECT	kinetochore	9	2	0.019	2.7	0.28	0.27
GOTERM_CC_DIRECT	mitochondrial respiratory chain complex I	5	1.1	0.025	4.5	0.35	0.34
GOTERM_CC_DIRECT	actin cytoskeleton	12	2.7	0.026	2.1	0.35	0.34
GOTERM_CC_DIRECT	mitochondrial membrane	9	2	0.026	2.5	0.35	0.34
GOTERM_CC_DIRECT	recycling endosome	8	1.8	0.03	2.7	0.39	0.38
GOTERM_CC_DIRECT	cytoplasmic ribonucleoprotein granule	6	1.3	0.033	3.4	0.41	0.4
GOTERM_CC_DIRECT	chromosome, telomeric region	9	2	0.033	2.4	0.41	0.4
GOTERM_CC_DIRECT	early endosome	13	2.9	0.038	1.9	0.45	0.44
GOTERM_CC_DIRECT	CCR4-NOT complex	3	0.7	0.045	8.7	0.51	0.5
GOTERM_CC_DIRECT	COPII vesicle coat	3	0.7	0.045	8.7	0.51	0.5
GOTERM_CC_DIRECT	membrane	137	30.3	0.048	1.1	0.53	0.52
GOTERM_CC_DIRECT	site of double-strand break	6	1.3	0.05	3	0.54	0.53
GOTERM_CC_DIRECT	polysome	4	0.9	0.051	4.8	0.54	0.53
GOTERM_CC_DIRECT	dendrite	16	3.5	0.055	1.7	0.58	0.56
GOTERM_CC_DIRECT	DNA ligase IV complex	2	0.4	0.063	31	0.64	0.63
GOTERM_CC_DIRECT	nuclear body	13	2.9	0.07	1.8	0.7	0.68
GOTERM_CC_DIRECT	small-subunit processome	5	1.1	0.077	3.1	0.76	0.74
GOTERM_CC_DIRECT	mitotic checkpoint complex	2	0.4	0.083	23.3	0.77	0.75
GOTERM_CC_DIRECT	Hrd1p ubiquitin ligase complex	2	0.4	0.083	23.3	0.77	0.75
GOTERM_CC_DIRECT	mitochondrial respiratory chain complex II, succinate dehydrogenase complex (ubiquinone)	2	0.4	0.083	23.3	0.77	0.75
GOTERM_CC_DIRECT	kinetochore microtubule	3	0.7	0.086	6.1	0.79	0.77
GOTERM_CC_DIRECT	lysosomal membrane	14	3.1	0.089	1.6	0.79	0.77
GOTERM_CC_DIRECT	trans-Golgi network	8	1.8	0.1	2	0.86	0.84

## Sheet: Table 10 GO MF
Supplementary table 10: Gene ontology analysis for the hsa-miR-1246 target genes, Molecular function
Category	Term	Count	%	P-Value	Fold Enrichment	Benjamini	FDR
GOTERM_MF_DIRECT	protein binding	367	81.2	6.3e-16	1.3	3.6e-13	3.6e-13
GOTERM_MF_DIRECT	RNA binding	86	19	1.9e-15	2.5	5.6e-13	5.4e-13
GOTERM_MF_DIRECT	double-stranded RNA binding	13	2.9	9.9e-08	7.7	1.9e-05	1.9e-05
GOTERM_MF_DIRECT	metal ion binding	97	21.5	1.7e-05	1.5	0.0024	0.0024
GOTERM_MF_DIRECT	DNA binding	51	11.3	0.00059	1.6	0.068	0.066
GOTERM_MF_DIRECT	ubiquitin-protein transferase activity	15	3.3	0.0011	2.8	0.1	0.1
GOTERM_MF_DIRECT	RNA polymerase II transcription factor activity, sequence-specific DNA binding	47	10.4	0.0012	1.6	0.1	0.1
GOTERM_MF_DIRECT	RNA polymerase II core promoter proximal region sequence-specific DNA binding	44	9.7	0.0017	1.6	0.11	0.1
GOTERM_MF_DIRECT	mRNA binding	15	3.3	0.0017	2.7	0.11	0.1
GOTERM_MF_DIRECT	GDP binding	8	1.8	0.0018	4.6	0.11	0.1
GOTERM_MF_DIRECT	transcription corepressor activity	13	2.9	0.0026	2.8	0.12	0.12
GOTERM_MF_DIRECT	NADH dehydrogenase (ubiquinone) activity	6	1.3	0.003	6	0.12	0.12
GOTERM_MF_DIRECT	histone deacetylase binding	10	2.2	0.003	3.4	0.12	0.12
GOTERM_MF_DIRECT	GTP binding	20	4.4	0.0032	2.1	0.12	0.12
GOTERM_MF_DIRECT	cadherin binding	17	3.8	0.0032	2.3	0.12	0.12
GOTERM_MF_DIRECT	transcription coactivator activity	15	3.3	0.0037	2.4	0.13	0.13
GOTERM_MF_DIRECT	chromatin binding	22	4.9	0.0047	2	0.16	0.16
GOTERM_MF_DIRECT	transcription corepressor binding	6	1.3	0.0053	5.3	0.16	0.16
GOTERM_MF_DIRECT	ubiquitin-like protein transferase activity	5	1.1	0.0053	7	0.16	0.16
GOTERM_MF_DIRECT	ubiquitin conjugating enzyme activity	5	1.1	0.0083	6.2	0.24	0.23
GOTERM_MF_DIRECT	ATP binding	51	11.3	0.0086	1.4	0.24	0.23
GOTERM_MF_DIRECT	kinase activity	13	2.9	0.0094	2.4	0.25	0.24
GOTERM_MF_DIRECT	ligand-dependent nuclear receptor transcription coactivator activity	6	1.3	0.011	4.5	0.27	0.26
GOTERM_MF_DIRECT	protein serine/threonine phosphatase activity	6	1.3	0.011	4.4	0.27	0.27
GOTERM_MF_DIRECT	ubiquitin-specific protease binding	4	0.9	0.012	8.2	0.27	0.27
GOTERM_MF_DIRECT	binding, bridging	11	2.4	0.014	2.5	0.31	0.3
GOTERM_MF_DIRECT	estrogen receptor binding	5	1.1	0.014	5.3	0.31	0.3
GOTERM_MF_DIRECT	histone acetyltransferase binding	4	0.9	0.017	7.2	0.35	0.35
GOTERM_MF_DIRECT	guanyl-nucleotide exchange factor activity	12	2.7	0.019	2.2	0.38	0.37
GOTERM_MF_DIRECT	single-stranded RNA binding	5	1.1	0.021	4.7	0.41	0.4
GOTERM_MF_DIRECT	magnesium ion binding	12	2.7	0.022	2.2	0.41	0.4
GOTERM_MF_DIRECT	kinase activator activity	3	0.7	0.025	11.8	0.45	0.44
GOTERM_MF_DIRECT	mRNA 3'-UTR AU-rich region binding	4	0.9	0.026	6.2	0.45	0.44
GOTERM_MF_DIRECT	RNA 7-methylguanosine cap binding	3	0.7	0.03	10.8	0.5	0.49
GOTERM_MF_DIRECT	RNA polymerase II regulatory region sequence-specific DNA binding	15	3.3	0.03	1.9	0.5	0.49
GOTERM_MF_DIRECT	protein kinase binding	19	4.2	0.032	1.7	0.51	0.5
GOTERM_MF_DIRECT	RNA cap binding	3	0.7	0.035	10	0.54	0.53
GOTERM_MF_DIRECT	GTPase activity	15	3.3	0.036	1.8	0.54	0.53
GOTERM_MF_DIRECT	protein binding, bridging involved in substrate recognition for ubiquitination	5	1.1	0.04	3.9	0.59	0.58
GOTERM_MF_DIRECT	myosin phosphatase activity	6	1.3	0.051	3	0.71	0.69
GOTERM_MF_DIRECT	lamin binding	3	0.7	0.051	8.1	0.71	0.69
GOTERM_MF_DIRECT	signaling adaptor activity	5	1.1	0.052	3.5	0.71	0.69
GOTERM_MF_DIRECT	miRNA binding	4	0.9	0.053	4.7	0.71	0.69
GOTERM_MF_DIRECT	enzyme binding	15	3.3	0.054	1.7	0.71	0.69
GOTERM_MF_DIRECT	nucleic acid binding	13	2.9	0.056	1.8	0.72	0.7
GOTERM_MF_DIRECT	ubiquitin protein ligase binding	13	2.9	0.058	1.8	0.73	0.72
GOTERM_MF_DIRECT	transferase activity	8	1.8	0.061	2.3	0.74	0.72
GOTERM_MF_DIRECT	protein kinase activity	15	3.3	0.063	1.7	0.74	0.72
GOTERM_MF_DIRECT	protein domain specific binding	10	2.2	0.065	2	0.74	0.72
GOTERM_MF_DIRECT	transcriptional activator activity, RNA polymerase II transcription regulatory region sequence-specific binding	18	4	0.065	1.6	0.74	0.72
GOTERM_MF_DIRECT	ubiquitin protein ligase activity	14	3.1	0.066	1.7	0.74	0.72
GOTERM_MF_DIRECT	protein serine/threonine kinase activity	15	3.3	0.067	1.7	0.74	0.72
GOTERM_MF_DIRECT	3 iron, 4 sulfur cluster binding	2	0.4	0.068	28.9	0.74	0.72
GOTERM_MF_DIRECT	helicase activity	6	1.3	0.073	2.7	0.79	0.77
GOTERM_MF_DIRECT	ubiquitin binding	6	1.3	0.076	2.7	0.79	0.77
GOTERM_MF_DIRECT	nuclear import signal receptor activity	3	0.7	0.077	6.5	0.79	0.77
GOTERM_MF_DIRECT	phosphoprotein phosphatase activity	4	0.9	0.08	3.9	0.82	0.8
GOTERM_MF_DIRECT	RNA polymerase II core promoter sequence-specific DNA binding	3	0.7	0.083	6.2	0.83	0.81
GOTERM_MF_DIRECT	sequence-specific DNA binding	13	2.9	0.087	1.7	0.83	0.81
GOTERM_MF_DIRECT	ISG15 transferase activity	2	0.4	0.089	21.7	0.83	0.81
GOTERM_MF_DIRECT	stem cell factor receptor binding	2	0.4	0.089	21.7	0.83	0.81
GOTERM_MF_DIRECT	POZ domain binding	2	0.4	0.089	21.7	0.83	0.81
GOTERM_MF_DIRECT	translation factor activity, RNA binding	3	0.7	0.09	5.9	0.83	0.81
GOTERM_MF_DIRECT	ligase activity	4	0.9	0.094	3.7	0.85	0.83

[truncated: 4 more sheets: Table 11 BC vs Meta, Table 12 Ensemble ID 9 genes, Table 13 GO BP , Table 14 GO CC ]
